# Supplementary material
Source: publisher figshare collection journal article supplement (https://acs.figshare.com/ndownloader/files/8664151)
Supplement: Supplementary file 1 [file 8664151]

 
data_ic17676 
  
_audit_creation_method            'SHELXL-2014/7' 
_shelx_SHELXL_version_number      '2014/7' 
_chemical_name_systematic         ? 
_chemical_name_common             ? 
_chemical_melting_point           ? 
_chemical_formula_moiety          ? 
_chemical_formula_sum 
 'C11 H12 O4' 
_chemical_formula_weight          208.21 
  
loop_ 
 _atom_type_symbol 
 _atom_type_description 
 _atom_type_scat_dispersion_real 
 _atom_type_scat_dispersion_imag 
 _atom_type_scat_source 
 'C'  'C'   0.0181   0.0091 
 'International Tables Vol C Tables 4.2.6.8 and 6.1.1.4' 
 'H'  'H'   0.0000   0.0000 
 'International Tables Vol C Tables 4.2.6.8 and 6.1.1.4' 
 'O'  'O'   0.0492   0.0322 
 'International Tables Vol C Tables 4.2.6.8 and 6.1.1.4' 
  
_space_group_crystal_system       orthorhombic 
_space_group_IT_number            19 
_space_group_name_H-M_alt         'P 21 21 21' 
_space_group_name_Hall            'P 2ac 2ab' 
  
_shelx_space_group_comment 
; 
The symmetry employed for this shelxl refinement is uniquely defined 
by the following loop, which should always be used as a source of 
symmetry information in preference to the above space-group names. 
They are only intended as comments. 
; 
  
loop_ 
 _space_group_symop_operation_xyz 
 'x, y, z' 
 '-x+1/2, -y, z+1/2' 
 '-x, y+1/2, -z+1/2' 
 'x+1/2, -y+1/2, -z' 
  
_cell_length_a                    7.0397(2) 
_cell_length_b                    9.0581(3) 
_cell_length_c                    15.2974(5) 
_cell_angle_alpha                 90 
_cell_angle_beta                  90 
_cell_angle_gamma                 90 
_cell_volume                      975.46(5) 
_cell_formula_units_Z             4 
_cell_measurement_temperature     200(2) 
_cell_measurement_reflns_used     6891 
_cell_measurement_theta_min       5.68 
_cell_measurement_theta_max       70.04 
  
_exptl_crystal_description        block 
_exptl_crystal_colour             colourless 
_exptl_crystal_density_meas       ? 
_exptl_crystal_density_method     ? 
_exptl_crystal_density_diffrn     1.418 
_exptl_crystal_F_000              440 
_exptl_transmission_factor_min    ? 
_exptl_transmission_factor_max    ? 
_exptl_crystal_size_max           0.240 
_exptl_crystal_size_mid           0.220 
_exptl_crystal_size_min           0.150 
_exptl_absorpt_coefficient_mu     0.907 
_shelx_estimated_absorpt_T_min    0.812 
_shelx_estimated_absorpt_T_max    0.876 
_exptl_absorpt_correction_type    multi-scan 
_exptl_absorpt_correction_T_min   0.6470 
_exptl_absorpt_correction_T_max   0.7533 
_exptl_absorpt_process_details    'SADABS (Bruker, 2014)'
_exptl_absorpt_special_details    ? 
_diffrn_ambient_temperature       200(2) 
_diffrn_radiation_wavelength      1.54178 
_diffrn_radiation_type            CuK\a 
_diffrn_source                    ? 
_diffrn_measurement_device_type   'Bruker D8 VENTURE' 
_diffrn_measurement_method        '\f and \w scans' 
_diffrn_detector_area_resol_mean  ? 
_diffrn_reflns_number             5299 
_diffrn_reflns_av_unetI/netI      0.0331 
_diffrn_reflns_av_R_equivalents   0.0265 
_diffrn_reflns_limit_h_min        -8 
_diffrn_reflns_limit_h_max        8 
_diffrn_reflns_limit_k_min        -11 
_diffrn_reflns_limit_k_max        9 
_diffrn_reflns_limit_l_min        -18 
_diffrn_reflns_limit_l_max        18 
_diffrn_reflns_theta_min          5.676 
_diffrn_reflns_theta_max          69.890 
_diffrn_reflns_theta_full         67.679 
_diffrn_measured_fraction_theta_max   0.997 
_diffrn_measured_fraction_theta_full  0.997 
_diffrn_reflns_Laue_measured_fraction_max    0.997 
_diffrn_reflns_Laue_measured_fraction_full   0.997 
_diffrn_reflns_point_group_measured_fraction_max   0.996 
_diffrn_reflns_point_group_measured_fraction_full  0.997 
_reflns_number_total              1841 
_reflns_number_gt                 1800 
_reflns_threshold_expression      'I > 2\s(I)' 
_reflns_Friedel_coverage          0.687 
_reflns_Friedel_fraction_max      0.993 
_reflns_Friedel_fraction_full     0.996 
  
_reflns_special_details 
; 
 Reflections were merged by SHELXL according to the crystal 
 class for the calculation of statistics and refinement. 
  
 _reflns_Friedel_fraction is defined as the number of unique 
 Friedel pairs measured divided by the number that would be 
 possible theoretically, ignoring centric projections and 
 systematic absences. 
; 
  
_computing_data_collection        'Bruker APEX3' 
_computing_cell_refinement        'Bruker SAINT' 
_computing_data_reduction         'Bruker SAINT' 
_computing_structure_solution     'SHELXS-97 (Sheldrick 2008)' 
_computing_structure_refinement 'SHELXL-2014/7 (Sheldrick, 2014)' 
_computing_molecular_graphics     'Bruker SHELXTL' 
_computing_publication_material   'Bruker SHELXTL' 
_refine_special_details           ? 
_refine_ls_structure_factor_coef  Fsqd 
_refine_ls_matrix_type            full 
_refine_ls_weighting_scheme       calc 
_refine_ls_weighting_details 
'w=1/[\s^2^(Fo^2^)+(0.0437P)^2^] where P=(Fo^2^+2Fc^2^)/3' 
_atom_sites_solution_primary      ? 
_atom_sites_solution_secondary    ? 
_atom_sites_solution_hydrogens    geom 
_refine_ls_hydrogen_treatment     constr 
_refine_ls_extinction_method      'SHELXL-2014/7 (Sheldrick 2014' 
_refine_ls_extinction_coef        0.0069(14) 
_refine_ls_extinction_expression 
 'Fc^*^=kFc[1+0.001xFc^2^\l^3^/sin(2\q)]^-1/4^' 
_refine_ls_abs_structure_details 
; 
 Flack x determined using 726 quotients [(I+)-(I-)]/[(I+)+(I-)] 
 (Parsons, Flack and Wagner, Acta Cryst. B69 (2013) 249-259). 
; 
_refine_ls_abs_structure_Flack    0.02(6) 
_chemical_absolute_configuration  'ad' 
_refine_ls_number_reflns          1841 
_refine_ls_number_parameters      139 
_refine_ls_number_restraints      0 
_refine_ls_R_factor_all           0.0311 
_refine_ls_R_factor_gt            0.0305 
_refine_ls_wR_factor_ref          0.0827 
_refine_ls_wR_factor_gt           0.0823 
_refine_ls_goodness_of_fit_ref    1.503 
_refine_ls_restrained_S_all       1.503 
_refine_ls_shift/su_max           0.000 
_refine_ls_shift/su_mean          0.000 
  
loop_ 
 _atom_site_label 
 _atom_site_type_symbol 
 _atom_site_fract_x 
 _atom_site_fract_y 
 _atom_site_fract_z 
 _atom_site_U_iso_or_equiv 
 _atom_site_adp_type 
 _atom_site_occupancy 
 _atom_site_site_symmetry_order 
 _atom_site_calc_flag 
 _atom_site_refinement_flags_posn 
 _atom_site_refinement_flags_adp 
 _atom_site_refinement_flags_occupancy 
 _atom_site_disorder_assembly 
 _atom_site_disorder_group 
O1 O 0.3120(2) 0.57621(16) 0.19964(7) 0.0340(4) Uani 1 1 d . . . . . 
O2 O 0.15068(18) 0.76100(15) 0.27663(7) 0.0290(3) Uani 1 1 d . . . . . 
O3 O 0.1853(2) 0.45995(13) 0.52133(7) 0.0286(3) Uani 1 1 d . . . . . 
H3 H 0.1887 0.4622 0.5762 0.043 Uiso 1 1 calc R U . . . 
O4 O 0.21751(17) 0.97671(13) 0.56503(7) 0.0265(3) Uani 1 1 d . . . . . 
C1 C 0.4370(3) 0.4930(2) 0.25612(11) 0.0346(4) Uani 1 1 d . . . . . 
H1A H 0.5143 0.5597 0.2930 0.042 Uiso 1 1 calc R U . . . 
H1B H 0.5231 0.4293 0.2215 0.042 Uiso 1 1 calc R U . . . 
C2 C 0.3045(3) 0.4011(2) 0.31144(10) 0.0315(4) Uani 1 1 d . . . . . 
H2A H 0.3654 0.3711 0.3670 0.038 Uiso 1 1 calc R U . . . 
H2B H 0.2615 0.3119 0.2797 0.038 Uiso 1 1 calc R U . . . 
C3 C 0.1396(2) 0.5081(2) 0.32753(9) 0.0231(4) Uani 1 1 d . . . . . 
H3A H 0.0152 0.4556 0.3330 0.028 Uiso 1 1 calc R U . . . 
C4 C 0.1452(2) 0.6112(2) 0.24670(10) 0.0270(4) Uani 1 1 d . . . . . 
H4 H 0.0306 0.5947 0.2093 0.032 Uiso 1 1 calc R U . . . 
C5 C 0.1693(2) 0.61803(18) 0.39956(9) 0.0192(3) Uani 1 1 d . . . . . 
C6 C 0.1869(2) 0.59992(17) 0.48966(10) 0.0195(3) Uani 1 1 d . . . . . 
C7 C 0.2028(2) 0.72386(19) 0.54285(9) 0.0201(3) Uani 1 1 d . . . . . 
H7 H 0.2134 0.7125 0.6044 0.024 Uiso 1 1 calc R U . . . 
C8 C 0.2033(2) 0.86431(18) 0.50616(10) 0.0195(3) Uani 1 1 d . . . . . 
C9 C 0.1895(2) 0.88622(18) 0.41609(11) 0.0214(3) Uani 1 1 d . . . . . 
H9 H 0.1919 0.9818 0.3906 0.026 Uiso 1 1 calc R U . . . 
C10 C 0.17217(19) 0.7589(2) 0.36639(10) 0.0209(4) Uani 1 1 d . . . . . 
C11 C 0.2158(3) 1.1243(2) 0.53238(12) 0.0322(4) Uani 1 1 d . . . . . 
H11A H 0.3243 1.1388 0.4932 0.048 Uiso 1 1 calc R U . . . 
H11B H 0.2245 1.1937 0.5813 0.048 Uiso 1 1 calc R U . . . 
H11C H 0.0975 1.1417 0.5002 0.048 Uiso 1 1 calc R U . . . 
  
loop_ 
 _atom_site_aniso_label 
 _atom_site_aniso_U_11 
 _atom_site_aniso_U_22 
 _atom_site_aniso_U_33 
 _atom_site_aniso_U_23 
 _atom_site_aniso_U_13 
 _atom_site_aniso_U_12 
O1 0.0473(7) 0.0408(8) 0.0140(5) -0.0016(5) 0.0051(5) 0.0038(6) 
O2 0.0434(6) 0.0293(7) 0.0145(5) 0.0030(4) -0.0030(4) 0.0050(5) 
O3 0.0535(7) 0.0181(6) 0.0141(5) 0.0018(4) -0.0008(5) -0.0028(5) 
O4 0.0387(6) 0.0169(6) 0.0239(5) -0.0043(4) 0.0000(4) -0.0005(5) 
C1 0.0342(9) 0.0447(11) 0.0248(7) -0.0051(8) 0.0042(6) 0.0053(8) 
C2 0.0445(9) 0.0299(9) 0.0201(6) -0.0041(6) 0.0006(7) 0.0072(8) 
C3 0.0284(7) 0.0258(9) 0.0152(7) -0.0032(6) -0.0007(5) -0.0028(6) 
C4 0.0324(8) 0.0329(10) 0.0157(7) -0.0032(6) -0.0048(6) 0.0011(7) 
C5 0.0222(6) 0.0196(8) 0.0160(7) -0.0021(6) 0.0002(5) -0.0003(6) 
C6 0.0242(7) 0.0183(8) 0.0159(6) 0.0011(5) -0.0005(5) -0.0006(6) 
C7 0.0249(7) 0.0220(9) 0.0134(6) -0.0001(5) -0.0005(5) 0.0003(6) 
C8 0.0184(6) 0.0187(8) 0.0213(7) -0.0024(6) 0.0005(5) 0.0004(6) 
C9 0.0244(7) 0.0179(8) 0.0219(7) 0.0034(5) 0.0015(6) 0.0032(5) 
C10 0.0201(6) 0.0268(8) 0.0156(7) 0.0026(6) 0.0003(5) 0.0006(6) 
C11 0.0423(10) 0.0167(8) 0.0377(9) -0.0034(7) 0.0020(7) 0.0013(7) 
  
_geom_special_details 
; 
 All esds (except the esd in the dihedral angle between two l.s. planes) 
 are estimated using the full covariance matrix.  The cell esds are taken 
 into account individually in the estimation of esds in distances, angles 
 and torsion angles; correlations between esds in cell parameters are only 
 used when they are defined by crystal symmetry.  An approximate (isotropic) 
 treatment of cell esds is used for estimating esds involving l.s. planes. 
; 
  
loop_ 
 _geom_bond_atom_site_label_1 
 _geom_bond_atom_site_label_2 
 _geom_bond_distance 
 _geom_bond_site_symmetry_2 
 _geom_bond_publ_flag 
O1 C4 1.414(2) . ? 
O1 C1 1.445(2) . ? 
O2 C10 1.3815(18) . ? 
O2 C4 1.433(2) . ? 
O3 C6 1.3573(19) . ? 
O3 H3 0.8400 . ? 
O4 C8 1.363(2) . ? 
O4 C11 1.427(2) . ? 
C1 C2 1.510(3) . ? 
C1 H1A 0.9900 . ? 
C1 H1B 0.9900 . ? 
C2 C3 1.532(2) . ? 
C2 H2A 0.9900 . ? 
C2 H2B 0.9900 . ? 
C3 C5 1.500(2) . ? 
C3 C4 1.550(2) . ? 
C3 H3A 1.0000 . ? 
C4 H4 1.0000 . ? 
C5 C10 1.373(2) . ? 
C5 C6 1.393(2) . ? 
C6 C7 1.391(2) . ? 
C7 C8 1.390(2) . ? 
C7 H7 0.9500 . ? 
C8 C9 1.395(2) . ? 
C9 C10 1.387(2) . ? 
C9 H9 0.9500 . ? 
C11 H11A 0.9800 . ? 
C11 H11B 0.9800 . ? 
C11 H11C 0.9800 . ? 
  
loop_ 
 _geom_angle_atom_site_label_1 
 _geom_angle_atom_site_label_2 
 _geom_angle_atom_site_label_3 
 _geom_angle 
 _geom_angle_site_symmetry_1 
 _geom_angle_site_symmetry_3 
 _geom_angle_publ_flag 
C4 O1 C1 108.56(12) . . ? 
C10 O2 C4 107.92(12) . . ? 
C6 O3 H3 109.5 . . ? 
C8 O4 C11 117.90(12) . . ? 
O1 C1 C2 104.26(14) . . ? 
O1 C1 H1A 110.9 . . ? 
C2 C1 H1A 110.9 . . ? 
O1 C1 H1B 110.9 . . ? 
C2 C1 H1B 110.9 . . ? 
H1A C1 H1B 108.9 . . ? 
C1 C2 C3 102.08(15) . . ? 
C1 C2 H2A 111.4 . . ? 
C3 C2 H2A 111.4 . . ? 
C1 C2 H2B 111.4 . . ? 
C3 C2 H2B 111.4 . . ? 
H2A C2 H2B 109.2 . . ? 
C5 C3 C2 115.62(13) . . ? 
C5 C3 C4 100.53(13) . . ? 
C2 C3 C4 103.52(12) . . ? 
C5 C3 H3A 112.1 . . ? 
C2 C3 H3A 112.1 . . ? 
C4 C3 H3A 112.1 . . ? 
O1 C4 O2 110.65(14) . . ? 
O1 C4 C3 106.99(14) . . ? 
O2 C4 C3 108.44(12) . . ? 
O1 C4 H4 110.2 . . ? 
O2 C4 H4 110.2 . . ? 
C3 C4 H4 110.2 . . ? 
C10 C5 C6 118.26(14) . . ? 
C10 C5 C3 110.33(13) . . ? 
C6 C5 C3 131.37(14) . . ? 
O3 C6 C7 123.08(13) . . ? 
O3 C6 C5 117.53(13) . . ? 
C7 C6 C5 119.39(14) . . ? 
C8 C7 C6 120.16(13) . . ? 
C8 C7 H7 119.9 . . ? 
C6 C7 H7 119.9 . . ? 
O4 C8 C7 114.64(13) . . ? 
O4 C8 C9 123.45(14) . . ? 
C7 C8 C9 121.91(14) . . ? 
C10 C9 C8 115.42(14) . . ? 
C10 C9 H9 122.3 . . ? 
C8 C9 H9 122.3 . . ? 
C5 C10 O2 112.23(14) . . ? 
C5 C10 C9 124.84(13) . . ? 
O2 C10 C9 122.90(15) . . ? 
O4 C11 H11A 109.5 . . ? 
O4 C11 H11B 109.5 . . ? 
H11A C11 H11B 109.5 . . ? 
O4 C11 H11C 109.5 . . ? 
H11A C11 H11C 109.5 . . ? 
H11B C11 H11C 109.5 . . ? 
  
loop_ 
 _geom_hbond_atom_site_label_D 
 _geom_hbond_atom_site_label_H 
 _geom_hbond_atom_site_label_A 
 _geom_hbond_distance_DH 
 _geom_hbond_distance_HA 
 _geom_hbond_distance_DA 
 _geom_hbond_angle_DHA 
 _geom_hbond_site_symmetry_A 
O3 H3 O1  0.84 1.92 2.7473(15) 168.0 2_565 
C1 H1A O4  0.99 2.62 3.385(2) 134.0 4_566 
  
_refine_diff_density_max    0.240 
_refine_diff_density_min   -0.206 
_refine_diff_density_rms    0.078 
  
_shelx_res_file 
; 
  
    ic17676.res created by SHELXL-2014/7 
  
  
TITL ic17676 in P2(1)2(1)2(1) 
CELL 1.54178   7.03970   9.05810  15.29740  90.0000  90.0000  90.0000 
ZERR    4.00   0.00020   0.00030   0.00050   0.0000   0.0000   0.0000 
LATT -1 
SYMM 0.5-X, -Y, 0.5+Z 
SYMM -X, 0.5+Y, 0.5-Z 
SYMM 0.5+X, 0.5-Y, -Z 
SFAC C  H  O 
UNIT 44  48  16 
OMIT -3 140 
L.S. 10 
EQIV $1 -x+1/2, -y+1, z+1/2 
HTAB O3 O1_$1 
EQIV $2 x+1/2, -y+3/2, -z+1 
HTAB C1 O4_$2 
ACTA 
BOND $H 
FMAP 2 
PLAN 20 
SIZE 0.15 0.22 0.24 
TEMP -73.150 
WGHT    0.043700 
EXTI    0.006907 
FVAR       0.21699 
O1    3    0.312036    0.576215    0.199638    11.00000    0.04729    0.04079 = 
         0.01402   -0.00157    0.00506    0.00383 
O2    3    0.150680    0.761000    0.276631    11.00000    0.04336    0.02928 = 
         0.01450    0.00302   -0.00304    0.00501 
O3    3    0.185300    0.459950    0.521329    11.00000    0.05350    0.01805 = 
         0.01413    0.00176   -0.00078   -0.00282 
AFIX 147 
H3    2    0.188715    0.462241    0.576201    11.00000   -1.50000 
AFIX   0 
O4    3    0.217505    0.976711    0.565030    11.00000    0.03872    0.01688 = 
         0.02385   -0.00431   -0.00004   -0.00045 
C1    1    0.437026    0.492991    0.256124    11.00000    0.03420    0.04473 = 
         0.02484   -0.00508    0.00422    0.00528 
AFIX  23 
H1A   2    0.514286    0.559746    0.293026    11.00000   -1.20000 
H1B   2    0.523107    0.429321    0.221518    11.00000   -1.20000 
AFIX   0 
C2    1    0.304452    0.401079    0.311439    11.00000    0.04451    0.02993 = 
         0.02008   -0.00413    0.00056    0.00723 
AFIX  23 
H2A   2    0.365444    0.371109    0.366987    11.00000   -1.20000 
H2B   2    0.261515    0.311853    0.279714    11.00000   -1.20000 
AFIX   0 
C3    1    0.139594    0.508117    0.327533    11.00000    0.02836    0.02582 = 
         0.01515   -0.00317   -0.00071   -0.00279 
AFIX  13 
H3A   2    0.015204    0.455622    0.333044    11.00000   -1.20000 
AFIX   0 
C4    1    0.145178    0.611207    0.246698    11.00000    0.03235    0.03293 = 
         0.01568   -0.00316   -0.00482    0.00114 
AFIX  13 
H4    2    0.030572    0.594744    0.209325    11.00000   -1.20000 
AFIX   0 
C5    1    0.169318    0.618031    0.399565    11.00000    0.02217    0.01956 = 
         0.01595   -0.00212    0.00019   -0.00030 
C6    1    0.186932    0.599925    0.489661    11.00000    0.02417    0.01826 = 
         0.01594    0.00110   -0.00053   -0.00062 
C7    1    0.202847    0.723864    0.542855    11.00000    0.02491    0.02200 = 
         0.01343   -0.00006   -0.00052    0.00028 
AFIX  43 
H7    2    0.213434    0.712524    0.604400    11.00000   -1.20000 
AFIX   0 
C8    1    0.203299    0.864309    0.506163    11.00000    0.01845    0.01875 = 
         0.02134   -0.00236    0.00051    0.00035 
C9    1    0.189549    0.886217    0.416089    11.00000    0.02445    0.01786 = 
         0.02190    0.00341    0.00152    0.00323 
AFIX  43 
H9    2    0.191934    0.981810    0.390566    11.00000   -1.20000 
AFIX   0 
C10   1    0.172167    0.758911    0.366388    11.00000    0.02010    0.02684 = 
         0.01562    0.00259    0.00026    0.00061 
C11   1    0.215806    1.124284    0.532380    11.00000    0.04229    0.01670 = 
         0.03771   -0.00340    0.00201    0.00131 
AFIX 137 
H11A  2    0.324290    1.138792    0.493163    11.00000   -1.50000 
H11B  2    0.224452    1.193738    0.581338    11.00000   -1.50000 
H11C  2    0.097508    1.141665    0.500216    11.00000   -1.50000 
  
AFIX   0 
HKLF 4 
  
REM  ic17676 in P2(1)2(1)2(1) 
REM R1 =  0.0305 for    1800 Fo > 4sig(Fo)  and  0.0311 for all    1841 data 
REM    139 parameters refined using      0 restraints 
  
END 
  
WGHT      0.0479      0.1370 
  
REM Highest difference peak  0.240,  deepest hole -0.206,  1-sigma level  0.078 
Q1    1   0.2231  0.6015  0.4264  11.00000  0.05    0.24 
Q2    1   0.2162  0.8335  0.3962  11.00000  0.05    0.22 
Q3    1   0.1829  0.5553  0.3772  11.00000  0.05    0.21 
Q4    1   0.2316  0.4536  0.3205  11.00000  0.05    0.21 
Q5    1   0.2401  0.6954  0.3786  11.00000  0.05    0.21 
Q6    1   0.2213  0.6657  0.5150  11.00000  0.05    0.20 
Q7    1   0.2423  0.9916  0.2997  11.00000  0.05    0.20 
Q8    1   0.2478  1.0777  0.3006  11.00000  0.05    0.20 
Q9    1   0.1579  0.8742  0.4644  11.00000  0.05    0.19 
Q10   1   0.2418  0.2939  0.3812  11.00000  0.05    0.19 
Q11   1   0.2362  1.1034  0.6814  11.00000  0.05    0.18 
Q12   1   0.2443  0.8741  0.4603  11.00000  0.05    0.18 
Q13   1  -0.2187  0.5631  0.2542  11.00000  0.05    0.18 
Q14   1   0.2515  1.0705  0.3571  11.00000  0.05    0.17 
Q15   1   0.1722  0.5549  0.2867  11.00000  0.05    0.17 
Q16   1   0.2491  0.7901  0.5229  11.00000  0.05    0.17 
Q17   1   0.2677  0.9001  0.2412  11.00000  0.05    0.17 
Q18   1   0.2329  0.1921  0.3553  11.00000  0.05    0.17 
Q19   1   0.2481  0.7317  0.6330  11.00000  0.05    0.16 
Q20   1   0.7297  0.4532  0.3141  11.00000  0.05    0.16 
; 
_shelx_res_checksum   78272 
  
_shelx_hkl_file 
; 
   2   0 -18    1.01    0.06 
   1   1 -18    2.84    0.11 
   2   1 -18    1.13    0.06 
   1   2 -18    2.25    0.09 
   1  -1 -17    1.22    0.06 
   2  -1 -17    2.39    0.09 
   3  -1 -17    0.79    0.06 
   0   0 -17    0.00    0.02 
   1   0 -17    2.14    0.09 
   2   0 -17    0.81    0.05 
   3   0 -17    1.39    0.06 
   0   1 -17    1.12    0.07 
   1   1 -17    1.24    0.07 
   2   1 -17    2.35    0.10 
   3   1 -17    0.96    0.05 
   0   2 -17    4.21    0.17 
   1   2 -17    1.71    0.08 
   2   2 -17    1.75    0.08 
   3   2 -17    3.31    0.12 
   1   3 -17    0.00    0.03 
   2   3 -17    3.53    0.14 
   1   4 -17    2.95    0.12 
  -1  -5 -16    7.23    0.25 
   0  -5 -16    0.04    0.03 
   1  -5 -16    7.06    0.25 
   2  -5 -16    0.79    0.05 
   0  -4 -16    0.39    0.06 
   1  -4 -16    1.11    0.07 
   2  -4 -16    0.97    0.08 
   3  -4 -16    1.42    0.07 
   1  -3 -16    2.36    0.12 
   2  -3 -16    4.97    0.20 
   3  -3 -16    3.09    0.13 
   1  -2 -16   10.83    0.38 
   2  -2 -16    2.46    0.10 
   3  -2 -16    0.38    0.04 
   0  -1 -16   10.04    0.35 
   1  -1 -16    0.91    0.06 
   2  -1 -16    0.45    0.05 
   3  -1 -16    4.22    0.16 
   4  -1 -16    1.28    0.06 
   0   0 -16    3.32    0.14 
   1   0 -16    2.98    0.12 
   2   0 -16    0.56    0.05 
   3   0 -16    0.90    0.06 
   4   0 -16    0.35    0.04 
   0   1 -16    9.90    0.35 
   1   1 -16    0.82    0.06 
   2   1 -16    0.47    0.05 
   3   1 -16    4.30    0.16 
   4   1 -16    1.31    0.06 
  -4   2 -16    2.69    0.13 
  -3   2 -16    0.46    0.07 
   0   2 -16    7.38    0.28 
   1   2 -16   10.81    0.39 
   2   2 -16    2.55    0.11 
   3   2 -16    0.35    0.04 
   4   2 -16    3.14    0.12 
  -3   3 -16    2.98    0.13 
   0   3 -16    7.06    0.26 
   1   3 -16    2.48    0.11 
   2   3 -16    5.18    0.19 
   3   3 -16    3.08    0.12 
  -3   4 -16    1.47    0.09 
  -2   4 -16    1.15    0.09 
   0   4 -16    0.39    0.06 
   1   4 -16    1.27    0.08 
   2   4 -16    1.16    0.07 
   3   4 -16    1.32    0.07 
  -2  -6 -15    0.97    0.06 
  -1  -6 -15    0.81    0.06 
   0  -6 -15    2.01    0.09 
   1  -6 -15    0.85    0.05 
   2  -6 -15    1.07    0.06 
  -3  -5 -15    3.79    0.15 
  -2  -5 -15    0.33    0.05 
  -1  -5 -15    6.29    0.23 
   0  -5 -15    0.17    0.03 
   1  -5 -15    6.28    0.23 
   2  -5 -15    0.22    0.03 
   3  -5 -15    3.20    0.16 
  -3  -4 -15    0.21    0.06 
  -2  -4 -15    0.63    0.07 
  -1  -4 -15    1.11    0.08 
   0  -4 -15    1.23    0.08 
   1  -4 -15    1.07    0.07 
   2  -4 -15    0.61    0.06 
   3  -4 -15    0.30    0.05 
   4  -4 -15    0.12    0.02 
  -2  -3 -15    0.49    0.08 
  -1  -3 -15    0.24    0.05 
   0  -3 -15    0.28    0.05 
   1  -3 -15    0.29    0.05 
   2  -3 -15    0.46    0.03 
   3  -3 -15    1.75    0.09 
   4  -3 -15    3.42    0.14 
   0  -2 -15    0.65    0.05 
   1  -2 -15   11.28    0.30 
   2  -2 -15    1.39    0.06 
   3  -2 -15    8.75    0.22 
   4  -2 -15    1.28    0.05 
   0  -1 -15    0.18    0.03 
   1  -1 -15    6.84    0.26 
   3  -1 -15    2.58    0.11 
   4  -1 -15    1.65    0.07 
   5  -1 -15    0.58    0.04 
  -5   0 -15    1.96    0.10 
  -4   0 -15    0.05    0.04 
  -3   0 -15    0.83    0.10 
  -1   0 -15    0.63    0.06 
   0   0 -15    0.02    0.02 
   1   0 -15    0.68    0.06 
   2   0 -15    0.04    0.03 
   3   0 -15    0.70    0.06 
   4   0 -15    0.10    0.03 
   5   0 -15    2.22    0.09 
  -5   1 -15    0.56    0.06 
  -4   1 -15    1.67    0.09 
  -3   1 -15    2.45    0.13 
  -1   1 -15    7.35    0.27 
   0   1 -15    0.22    0.04 
   1   1 -15    6.70    0.26 
   3   1 -15    2.62    0.12 
   4   1 -15    1.62    0.08 
   5   1 -15    0.59    0.05 
  -4   2 -15    1.26    0.08 
  -3   2 -15    8.67    0.32 
  -2   2 -15    1.28    0.11 
  -1   2 -15   13.32    0.45 
   0   2 -15    0.64    0.07 
   1   2 -15   11.82    0.43 
   2   2 -15    1.27    0.08 
   3   2 -15    8.79    0.32 
   4   2 -15    1.23    0.07 
  -4   3 -15    3.44    0.14 
  -3   3 -15    1.83    0.10 
  -2   3 -15    0.42    0.06 
  -1   3 -15    0.22    0.03 
   0   3 -15    0.15    0.04 
   2   3 -15    0.54    0.07 
   3   3 -15    1.67    0.09 
   4   3 -15    3.54    0.14 
  -4   4 -15    0.16    0.03 
  -3   4 -15    0.30    0.06 
  -2   4 -15    0.65    0.07 
  -1   4 -15    1.19    0.10 
   0   4 -15    1.13    0.09 
   1   4 -15    1.15    0.08 
   2   4 -15    0.68    0.07 
   3   4 -15    0.33    0.06 
   4   4 -15    0.09    0.03 
  -3   5 -15    4.17    0.16 
  -2   5 -15    0.30    0.06 
  -1   5 -15    6.29    0.24 
   0   5 -15    0.20    0.06 
   1   5 -15    6.32    0.26 
   2   5 -15    0.30    0.06 
   3   5 -15    3.86    0.16 
  -1   6 -15    0.73    0.07 
   0   6 -15    1.90    0.11 
  -1  -7 -14    0.81    0.05 
   0  -7 -14    0.11    0.03 
   1  -7 -14    0.78    0.05 
  -3  -6 -14    1.41    0.07 
  -2  -6 -14    1.17    0.07 
  -1  -6 -14    1.40    0.08 
   0  -6 -14    1.89    0.09 
   1  -6 -14    1.38    0.07 
   2  -6 -14    1.18    0.06 
   3  -6 -14    1.44    0.07 
  -3  -5 -14    0.53    0.06 
  -2  -5 -14    1.85    0.09 
  -1  -5 -14    2.57    0.12 
   0  -5 -14    0.20    0.04 
   1  -5 -14    2.58    0.11 
   2  -5 -14    1.80    0.09 
   3  -5 -14    0.47    0.05 
  -3  -4 -14    0.16    0.04 
  -2  -4 -14    1.58    0.09 
  -1  -4 -14    0.14    0.04 
   0  -4 -14    1.02    0.11 
   1  -4 -14    0.11    0.04 
   2  -4 -14    1.47    0.09 
   3  -4 -14    0.07    0.03 
   4  -4 -14    1.11    0.06 
  -5  -3 -14    1.18    0.08 
  -4  -3 -14    0.68    0.08 
  -3  -3 -14    0.51    0.09 
  -2  -3 -14    7.01    0.26 
  -1  -3 -14    0.11    0.04 
   0  -3 -14    1.37    0.09 
   1  -3 -14    0.03    0.02 
   2  -3 -14    6.22    0.25 
   3  -3 -14    0.29    0.03 
   4  -3 -14    0.68    0.06 
   5  -3 -14    1.24    0.07 
  -5  -2 -14    3.86    0.16 
  -4  -2 -14    6.11    0.23 
  -1  -2 -14    3.94    0.19 
   0  -2 -14    3.82    0.14 
   1  -2 -14    4.39    0.13 
   2  -2 -14    1.33    0.06 
   3  -2 -14   14.11    0.35 
   4  -2 -14    6.14    0.16 
   5  -2 -14    4.64    0.16 
  -5  -1 -14    0.76    0.07 
  -4  -1 -14    0.70    0.08 
  -3  -1 -14    1.13    0.10 
  -1  -1 -14   17.33    0.59 
   0  -1 -14    0.15    0.03 
   1  -1 -14   16.76    0.59 
   2  -1 -14    1.06    0.06 
   3  -1 -14    1.28    0.06 
   4  -1 -14    0.87    0.05 
   5  -1 -14    0.83    0.04 
  -5   0 -14    0.36    0.05 
  -4   0 -14    1.24    0.09 
  -3   0 -14   -0.01    0.05 
  -1   0 -14    7.01    0.27 
   0   0 -14    0.88    0.07 
   1   0 -14    7.22    0.27 
   2   0 -14    0.75    0.07 
   3   0 -14    0.00    0.03 
   4   0 -14    1.23    0.07 
   5   0 -14    0.33    0.04 
  -5   1 -14    0.86    0.06 
  -4   1 -14    0.83    0.08 
  -3   1 -14    1.24    0.11 
  -2   1 -14    0.99    0.11 
  -1   1 -14   17.32    0.60 
   0   1 -14    0.11    0.03 
   1   1 -14   16.87    0.60 
   2   1 -14    1.13    0.08 
   3   1 -14    1.27    0.08 
   4   1 -14    0.92    0.06 
   5   1 -14    0.84    0.05 
  -5   2 -14    3.94    0.16 
  -4   2 -14    6.23    0.24 
  -3   2 -14   13.92    0.50 
  -2   2 -14    1.28    0.11 
  -1   2 -14    4.18    0.14 
   0   2 -14    4.15    0.21 
   1   2 -14    4.52    0.19 
   2   2 -14    1.34    0.09 
   3   2 -14   14.09    0.50 
   4   2 -14    6.00    0.23 
   5   2 -14    4.12    0.16 
  -5   3 -14    1.24    0.08 
  -4   3 -14    0.77    0.07 
  -3   3 -14    0.34    0.06 
  -2   3 -14    6.89    0.30 
  -1   3 -14    0.04    0.04 
   0   3 -14    1.54    0.10 
   1   3 -14    0.03    0.04 
   3   3 -14    0.34    0.06 
   4   3 -14    0.73    0.06 
   5   3 -14    1.39    0.07 
  -4   4 -14    1.13    0.07 
  -3   4 -14    0.18    0.04 
  -2   4 -14    1.58    0.10 
  -1   4 -14    0.08    0.05 
   0   4 -14    0.97    0.09 
   1   4 -14    0.06    0.04 
   2   4 -14    1.67    0.10 
   3   4 -14    0.15    0.04 
   4   4 -14    1.03    0.07 
  -4   5 -14    0.25    0.04 
  -3   5 -14    0.54    0.06 
  -2   5 -14    1.85    0.10 
   0   5 -14    0.16    0.06 
   1   5 -14    2.61    0.14 
   2   5 -14    1.67    0.11 
   3   5 -14    0.48    0.08 
  -3   6 -14    1.44    0.08 
  -2   6 -14    1.13    0.08 
  -2  -7 -13    1.27    0.07 
  -1  -7 -13    0.56    0.05 
   0  -7 -13    4.88    0.18 
   1  -7 -13    0.69    0.05 
   2  -7 -13    1.19    0.06 
  -4  -6 -13    0.01    0.02 
  -3  -6 -13    0.42    0.05 
  -2  -6 -13    0.55    0.06 
  -1  -6 -13    0.22    0.04 
   0  -6 -13    0.01    0.03 
   1  -6 -13    0.26    0.04 
   2  -6 -13    0.53    0.05 
   3  -6 -13    0.43    0.05 
   4  -6 -13    0.01    0.03 
  -4  -5 -13    2.11    0.07 
  -3  -5 -13    1.20    0.08 
  -2  -5 -13    2.76    0.12 
  -1  -5 -13    0.47    0.08 
   0  -5 -13    0.39    0.06 
   2  -5 -13    2.70    0.12 
   3  -5 -13    1.28    0.07 
   4  -5 -13    1.97    0.09 
  -5  -4 -13    0.71    0.06 
  -4  -4 -13    1.07    0.06 
  -3  -4 -13    7.88    0.21 
  -2  -4 -13    0.16    0.04 
  -1  -4 -13   10.62    0.38 
   0  -4 -13    0.08    0.04 
   1  -4 -13   10.74    0.38 
   2  -4 -13    0.09    0.04 
   3  -4 -13    7.98    0.29 
   4  -4 -13    1.05    0.07 
   5  -4 -13    0.81    0.05 
  -5  -3 -13    6.20    0.17 
  -4  -3 -13    7.92    0.21 
  -3  -3 -13    1.05    0.10 
  -2  -3 -13   23.55    0.82 
  -1  -3 -13   21.06    0.74 
   0  -3 -13   21.84    0.52 
   1  -3 -13   21.59    0.52 
   2  -3 -13   23.78    0.58 
   3  -3 -13    0.87    0.07 
   4  -3 -13    7.94    0.20 
   5  -3 -13    6.65    0.24 
  -5  -2 -13    0.58    0.06 
  -4  -2 -13    2.99    0.14 
  -3  -2 -13    9.67    0.27 
  -2  -2 -13    1.73    0.12 
  -1  -2 -13    2.86    0.09 
   0  -2 -13    5.88    0.16 
   1  -2 -13    3.03    0.09 
   2  -2 -13    1.62    0.06 
   3  -2 -13    9.97    0.25 
   4  -2 -13    3.12    0.09 
   5  -2 -13    0.66    0.04 
  -6  -1 -13    3.15    0.13 
  -5  -1 -13    1.43    0.08 
  -4  -1 -13    2.34    0.12 
  -3  -1 -13    2.75    0.14 
  -1  -1 -13    1.94    0.09 
   0  -1 -13   11.93    0.42 
   1  -1 -13    1.79    0.07 
   2  -1 -13    6.48    0.17 
   3  -1 -13    2.82    0.09 
   4  -1 -13    2.21    0.11 
   5  -1 -13    1.47    0.05 
   6  -1 -13    3.22    0.09 
  -6   0 -13    0.03    0.03 
  -5   0 -13    0.34    0.06 
  -4   0 -13    1.67    0.12 
  -3   0 -13    4.22    0.20 
  -2   0 -13    0.82    0.12 
  -1   0 -13    0.24    0.04 
   0   0 -13   -0.01    0.03 
   1   0 -13    0.19    0.04 
   2   0 -13    0.74    0.07 
   4   0 -13    1.75    0.08 
   5   0 -13    0.48    0.04 
   6   0 -13    0.02    0.02 
  -6   1 -13    3.59    0.14 
  -5   1 -13    1.37    0.09 
  -4   1 -13    2.21    0.13 
  -3   1 -13    2.57    0.14 
  -2   1 -13    6.61    0.27 
  -1   1 -13    1.84    0.09 
   0   1 -13   11.99    0.43 
   1   1 -13    1.95    0.10 
   2   1 -13    6.42    0.25 
   3   1 -13    2.82    0.13 
   5   1 -13    1.40    0.08 
   6   1 -13    3.23    0.12 
  -5   2 -13    0.87    0.07 
  -4   2 -13    3.02    0.15 
  -3   2 -13    9.99    0.37 
  -2   2 -13    1.79    0.12 
  -1   2 -13    2.88    0.14 
   0   2 -13    5.98    0.23 
   1   2 -13    2.87    0.14 
   2   2 -13    2.01    0.11 
   3   2 -13    9.70    0.37 
   4   2 -13    2.98    0.14 
   5   2 -13    0.72    0.06 
  -5   3 -13    6.58    0.25 
  -4   3 -13    8.58    0.31 
  -3   3 -13    0.79    0.07 
  -1   3 -13   22.16    0.75 
   0   3 -13   20.83    0.74 
   1   3 -13   22.14    0.75 
   2   3 -13   23.76    0.83 
   3   3 -13    0.96    0.11 
   4   3 -13    7.79    0.30 
   5   3 -13    6.81    0.24 
  -5   4 -13    0.70    0.06 
  -4   4 -13    1.02    0.08 
  -3   4 -13    8.33    0.31 
  -1   4 -13   10.38    0.39 
   0   4 -13    0.03    0.04 
   1   4 -13   10.17    0.39 
   3   4 -13    8.24    0.30 
   4   4 -13    1.11    0.08 
   5   4 -13    0.59    0.06 
  -4   5 -13    1.97    0.08 
  -3   5 -13    1.23    0.09 
   1   5 -13    0.34    0.07 
   2   5 -13    2.64    0.15 
   3   5 -13    1.31    0.11 
   4   5 -13    2.07    0.12 
  -4   6 -13    0.04    0.04 
  -3   6 -13    0.43    0.06 
  -2  -8 -12    2.51    0.10 
  -1  -8 -12    0.92    0.06 
   0  -8 -12    5.19    0.19 
   1  -8 -12    0.96    0.06 
  -3  -7 -12    0.36    0.04 
  -2  -7 -12    0.76    0.06 
  -1  -7 -12    1.45    0.08 
   0  -7 -12    0.05    0.03 
   1  -7 -12    1.54    0.08 
   2  -7 -12    0.80    0.06 
   3  -7 -12    0.39    0.04 
  -4  -6 -12    0.41    0.04 
  -3  -6 -12    0.26    0.03 
  -2  -6 -12    0.66    0.06 
  -1  -6 -12    1.74    0.09 
   1  -6 -12    1.73    0.09 
   2  -6 -12    0.66    0.06 
   3  -6 -12    0.29    0.04 
   4  -6 -12    0.41    0.04 
  -5  -5 -12    1.07    0.07 
  -4  -5 -12    6.35    0.17 
  -3  -5 -12    1.32    0.06 
  -2  -5 -12    9.74    0.36 
  -1  -5 -12    0.26    0.04 
   0  -5 -12   14.37    0.49 
   1  -5 -12    0.43    0.06 
   2  -5 -12   10.32    0.36 
   3  -5 -12    1.29    0.08 
   4  -5 -12    6.17    0.23 
   5  -5 -12    0.94    0.06 
  -5  -4 -12    6.76    0.17 
  -4  -4 -12    3.81    0.09 
  -3  -4 -12    4.05    0.13 
  -1  -4 -12    6.55    0.25 
   0  -4 -12   11.96    0.43 
   1  -4 -12    6.82    0.25 
   3  -4 -12    3.62    0.16 
   4  -4 -12    3.60    0.15 
   5  -4 -12    6.41    0.24 
  -6  -3 -12    4.63    0.12 
  -5  -3 -12   11.47    0.42 
  -4  -3 -12   30.44    0.74 
  -3  -3 -12   41.20    1.02 
  -2  -3 -12   47.85    1.61 
  -1  -3 -12   15.53    0.54 
   0  -3 -12   34.00    0.80 
   1  -3 -12   15.46    0.38 
   2  -3 -12   46.94    1.14 
   3  -3 -12   41.77    1.02 
   4  -3 -12   30.44    1.04 
   5  -3 -12   12.03    0.29 
   6  -3 -12    4.95    0.17 
  -6  -2 -12    2.10    0.09 
  -5  -2 -12    3.37    0.15 
  -4  -2 -12   15.33    0.55 
  -3  -2 -12    0.91    0.07 
  -2  -2 -12   15.10    0.53 
  -1  -2 -12    9.06    0.23 
   0  -2 -12   27.67    0.66 
   1  -2 -12    9.07    0.23 
   2  -2 -12   14.91    0.37 
   3  -2 -12    1.00    0.05 
   4  -2 -12   16.04    0.39 
   5  -2 -12    3.47    0.10 
   6  -2 -12    1.97    0.06 
  -6  -1 -12    1.41    0.08 
  -5  -1 -12    2.30    0.12 
  -4  -1 -12    2.69    0.14 
  -3  -1 -12    7.21    0.28 
  -2  -1 -12    0.86    0.12 
  -1  -1 -12    0.02    0.03 
   0  -1 -12    1.74    0.07 
   1  -1 -12    0.03    0.02 
   2  -1 -12    0.72    0.05 
   3  -1 -12    7.12    0.19 
   4  -1 -12    2.64    0.09 
   5  -1 -12    2.25    0.08 
   6  -1 -12    1.49    0.05 
  -6   0 -12    0.03    0.03 
  -5   0 -12    0.09    0.04 
  -4   0 -12    1.81    0.11 
  -3   0 -12    0.71    0.09 
  -2   0 -12    1.00    0.06 
  -1   0 -12    1.35    0.08 
   0   0 -12    2.37    0.11 
   1   0 -12    1.31    0.08 
   2   0 -12    0.81    0.07 
   3   0 -12    0.80    0.06 
   4   0 -12    1.72    0.07 
   5   0 -12    0.03    0.02 
   6   0 -12    0.07    0.02 
  -6   1 -12    1.52    0.08 
  -5   1 -12    2.25    0.12 
  -4   1 -12    2.45    0.14 
  -3   1 -12    7.16    0.28 
  -2   1 -12    0.82    0.06 
  -1   1 -12    0.05    0.03 
   0   1 -12    1.67    0.10 
   1   1 -12   -0.03    0.03 
   2   1 -12    0.87    0.07 
   3   1 -12    7.03    0.27 
   4   1 -12    2.70    0.13 
   5   1 -12    2.25    0.08 
   6   1 -12    1.51    0.08 
  -6   2 -12    1.96    0.10 
  -5   2 -12    3.58    0.16 
  -4   2 -12   15.19    0.56 
  -3   2 -12    1.03    0.06 
  -2   2 -12   14.76    0.53 
  -1   2 -12    9.03    0.34 
   0   2 -12   27.42    0.95 
   1   2 -12    9.36    0.34 
   2   2 -12   15.13    0.53 
   3   2 -12    0.92    0.08 
   4   2 -12   15.38    0.55 
   5   2 -12    3.48    0.15 
   6   2 -12    1.92    0.09 
  -6   3 -12    4.37    0.17 
  -5   3 -12   12.30    0.43 
  -4   3 -12   31.86    1.04 
  -1   3 -12   15.33    0.54 
   0   3 -12   34.12    1.14 
   1   3 -12   15.53    0.55 
   2   3 -12   48.64    1.62 
   3   3 -12   42.56    1.45 
   4   3 -12   31.43    1.06 
   5   3 -12   11.95    0.43 
   6   3 -12    4.09    0.17 
  -5   4 -12    6.56    0.25 
  -4   4 -12    3.66    0.11 
  -3   4 -12    3.91    0.18 
  -1   4 -12    6.06    0.26 
   0   4 -12   11.97    0.44 
   1   4 -12    6.40    0.26 
   2   4 -12   16.02    0.57 
   3   4 -12    3.93    0.21 
   4   4 -12    3.70    0.16 
   5   4 -12    6.86    0.25 
  -5   5 -12    1.01    0.07 
  -4   5 -12    6.63    0.17 
   2   5 -12   10.19    0.38 
   3   5 -12    1.34    0.12 
   4   5 -12    6.02    0.25 
  -4   6 -12    0.38    0.04 
  -3   6 -12    0.18    0.04 
  -3   7 -12    0.31    0.05 
  -3  -8 -11    0.26    0.04 
  -2  -8 -11    0.50    0.05 
  -1  -8 -11    0.45    0.05 
   0  -8 -11    0.03    0.03 
   1  -8 -11    0.39    0.05 
   2  -8 -11    0.58    0.05 
   3  -8 -11    0.18    0.03 
  -4  -7 -11    1.50    0.06 
  -3  -7 -11    0.49    0.04 
  -2  -7 -11    2.01    0.10 
  -1  -7 -11    3.18    0.14 
   0  -7 -11    0.01    0.03 
   1  -7 -11    3.12    0.13 
   2  -7 -11    1.86    0.09 
   3  -7 -11    0.49    0.05 
   4  -7 -11    1.53    0.07 
  -5  -6 -11    0.61    0.05 
  -4  -6 -11    1.12    0.05 
  -3  -6 -11    0.40    0.04 
  -2  -6 -11    5.34    0.23 
  -1  -6 -11    2.07    0.10 
   0  -6 -11    0.02    0.03 
   1  -6 -11    1.93    0.10 
   2  -6 -11    5.76    0.22 
   3  -6 -11    0.37    0.05 
   4  -6 -11    1.25    0.07 
   5  -6 -11    0.63    0.04 
  -5  -5 -11    0.30    0.04 
  -4  -5 -11    6.40    0.14 
  -3  -5 -11    1.03    0.08 
  -2  -5 -11   14.69    0.38 
  -1  -5 -11   13.68    0.49 
   0  -5 -11   39.06    1.31 
   1  -5 -11   13.57    0.49 
   3  -5 -11    1.00    0.07 
   4  -5 -11    6.60    0.24 
   5  -5 -11    0.31    0.04 
  -6  -4 -11    3.67    0.10 
  -5  -4 -11    0.79    0.04 
  -4  -4 -11   23.35    0.79 
  -3  -4 -11    0.72    0.13 
  -2  -4 -11   19.74    0.49 
  -1  -4 -11    2.10    0.11 
   0  -4 -11    8.02    0.29 
   1  -4 -11    2.25    0.07 
   2  -4 -11   19.68    0.48 
   4  -4 -11   23.44    0.80 
   5  -4 -11    0.77    0.06 
   6  -4 -11    3.71    0.14 
  -6  -3 -11    7.68    0.28 
  -5  -3 -11    0.99    0.07 
  -4  -3 -11   16.15    0.40 
  -3  -3 -11    5.16    0.16 
  -2  -3 -11   17.83    0.62 
  -1  -3 -11   12.74    0.45 
   0  -3 -11   48.24    1.13 
   1  -3 -11   12.87    0.31 
   2  -3 -11   17.69    0.43 
   3  -3 -11    5.48    0.15 
   4  -3 -11   16.48    0.40 
   5  -3 -11    1.03    0.05 
   6  -3 -11    7.70    0.28 
  -6  -2 -11    1.86    0.09 
  -5  -2 -11    1.88    0.11 
  -4  -2 -11    8.40    0.38 
  -3  -2 -11   12.49    0.31 
  -2  -2 -11   30.56    1.03 
  -1  -2 -11    5.18    0.14 
   0  -2 -11    5.22    0.20 
   1  -2 -11    5.09    0.19 
   2  -2 -11   30.10    0.72 
   3  -2 -11   12.22    0.31 
   4  -2 -11   10.25    0.37 
   5  -2 -11    1.83    0.07 
   6  -2 -11    1.93    0.06 
  -6  -1 -11    0.71    0.06 
  -5  -1 -11    0.27    0.06 
  -4  -1 -11   12.98    0.46 
  -3  -1 -11    2.26    0.13 
  -2  -1 -11    9.75    0.37 
  -1  -1 -11    7.04    0.31 
   0  -1 -11    6.77    0.18 
   1  -1 -11    6.94    0.26 
   2  -1 -11   10.12    0.36 
   3  -1 -11    2.25    0.08 
   4  -1 -11   12.77    0.32 
   5  -1 -11    0.21    0.04 
   6  -1 -11    0.84    0.04 
  -6   0 -11    0.07    0.04 
  -5   0 -11    3.10    0.15 
  -4   0 -11    0.01    0.05 
  -3   0 -11   15.68    0.57 
  -2   0 -11    0.46    0.05 
  -1   0 -11    1.97    0.10 
   0   0 -11    0.02    0.03 
   1   0 -11    1.85    0.10 
   2   0 -11    0.54    0.05 
   3   0 -11   15.57    0.39 
   4   0 -11    0.05    0.03 
   5   0 -11    2.92    0.14 
   6   0 -11    0.11    0.02 
  -6   1 -11    0.74    0.07 
  -5   1 -11    0.13    0.05 
  -4   1 -11   12.58    0.46 
  -3   1 -11    2.31    0.09 
  -2   1 -11   10.16    0.26 
  -1   1 -11    6.76    0.25 
   0   1 -11    6.74    0.25 
   1   1 -11    5.59    0.26 
   2   1 -11    9.97    0.36 
   3   1 -11    2.39    0.12 
   4   1 -11   12.69    0.32 
   5   1 -11    0.24    0.04 
   6   1 -11    0.67    0.05 
  -6   2 -11    1.96    0.10 
  -5   2 -11    1.76    0.15 
  -4   2 -11    9.67    0.42 
  -3   2 -11   12.41    0.45 
  -2   2 -11   29.99    1.03 
   0   2 -11    5.07    0.23 
   1   2 -11    5.13    0.21 
   2   2 -11   30.65    1.03 
   3   2 -11   12.06    0.44 
   5   2 -11    1.77    0.10 
   6   2 -11    1.94    0.10 
  -6   3 -11    7.67    0.29 
  -5   3 -11    0.97    0.06 
  -4   3 -11   16.61    0.40 
  -2   3 -11   17.46    0.63 
  -1   3 -11   12.60    0.45 
   0   3 -11   46.63    1.61 
   1   3 -11   12.73    0.46 
   2   3 -11   17.91    0.63 
   3   3 -11    5.82    0.23 
   4   3 -11   15.49    0.57 
   5   3 -11    1.05    0.08 
   6   3 -11    7.88    0.28 
  -6   4 -11    3.74    0.15 
  -5   4 -11    0.83    0.05 
  -4   4 -11   24.05    0.81 
  -1   4 -11    2.02    0.14 
   0   4 -11    7.16    0.30 
   1   4 -11    2.09    0.14 
   2   4 -11   19.62    0.70 
   3   4 -11    0.81    0.11 
   4   4 -11   22.71    0.80 
   5   4 -11    0.71    0.08 
   6   4 -11    3.55    0.15 
  -5   5 -11    0.27    0.03 
  -4   5 -11    6.36    0.25 
   3   5 -11    0.84    0.13 
   4   5 -11    6.31    0.26 
   5   5 -11    0.24    0.06 
  -5   6 -11    0.53    0.04 
  -4   6 -11    1.27    0.06 
  -4   7 -11    1.58    0.06 
  -1  -9 -10    1.10    0.06 
   0  -9 -10   -0.01    0.02 
  -3  -8 -10    0.37    0.04 
  -2  -8 -10    0.90    0.06 
  -1  -8 -10    0.09    0.03 
   0  -8 -10    1.07    0.07 
   1  -8 -10    0.07    0.03 
   2  -8 -10    0.98    0.06 
   3  -8 -10    0.39    0.04 
  -4  -7 -10    3.24    0.09 
  -3  -7 -10    0.25    0.03 
  -2  -7 -10    2.31    0.08 
  -1  -7 -10    1.99    0.12 
   0  -7 -10    1.61    0.09 
   1  -7 -10    1.95    0.12 
   2  -7 -10    2.33    0.11 
   3  -7 -10    0.27    0.05 
   4  -7 -10    3.16    0.13 
  -5  -6 -10    5.00    0.11 
  -4  -6 -10    1.03    0.05 
  -3  -6 -10    1.72    0.10 
  -2  -6 -10    1.13    0.06 
  -1  -6 -10    1.95    0.12 
   0  -6 -10    7.90    0.28 
   1  -6 -10    1.89    0.12 
   2  -6 -10    1.19    0.08 
   3  -6 -10    1.92    0.11 
   4  -6 -10    0.91    0.07 
   5  -6 -10    5.02    0.19 
  -6  -5 -10    6.53    0.16 
  -5  -5 -10    2.74    0.07 
  -4  -5 -10   12.70    0.33 
  -3  -5 -10   13.69    0.35 
  -2  -5 -10   21.86    0.53 
  -1  -5 -10   12.29    0.44 
   0  -5 -10   28.91    0.99 
   1  -5 -10   12.58    0.44 
   2  -5 -10   21.66    0.75 
   3  -5 -10   13.98    0.49 
   5  -5 -10    2.76    0.12 
   6  -5 -10    6.83    0.23 
  -6  -4 -10    2.62    0.08 
  -5  -4 -10    0.58    0.05 
  -4  -4 -10    2.29    0.09 
  -3  -4 -10    2.41    0.09 
  -2  -4 -10   18.38    0.63 
  -1  -4 -10   17.95    0.60 
   0  -4 -10   55.58    1.83 
   1  -4 -10   16.63    0.43 
   2  -4 -10   18.21    0.44 
   3  -4 -10    2.46    0.08 
   4  -4 -10    2.34    0.08 
   5  -4 -10    0.62    0.06 
   6  -4 -10    2.36    0.11 
  -6  -3 -10    5.31    0.21 
  -5  -3 -10    0.15    0.05 
  -4  -3 -10    7.76    0.21 
  -3  -3 -10    7.24    0.20 
  -2  -3 -10   14.51    0.51 
  -1  -3 -10    5.73    0.24 
   0  -3 -10   27.14    0.65 
   1  -3 -10    6.49    0.23 
   2  -3 -10   14.63    0.36 
   3  -3 -10    7.23    0.19 
   4  -3 -10    7.92    0.20 
   5  -3 -10    0.13    0.03 
   6  -3 -10    5.60    0.14 
  -7  -2 -10    1.25    0.07 
  -6  -2 -10    3.59    0.16 
  -5  -2 -10   15.76    0.56 
  -4  -2 -10    0.26    0.04 
  -3  -2 -10    6.14    0.17 
  -2  -2 -10    7.25    0.21 
  -1  -2 -10   17.02    0.41 
   0  -2 -10    2.05    0.07 
   1  -2 -10   16.58    0.41 
   2  -2 -10    8.10    0.21 
   3  -2 -10    5.85    0.16 
   4  -2 -10    0.24    0.03 
   5  -2 -10   16.14    0.39 
   6  -2 -10    3.76    0.11 
   7  -2 -10    1.26    0.04 
  -7  -1 -10    2.01    0.09 
  -6  -1 -10    1.14    0.08 
  -5  -1 -10    0.46    0.07 
  -4  -1 -10    1.02    0.07 
  -3  -1 -10   19.57    0.71 
  -2  -1 -10    4.73    0.12 
  -1  -1 -10   19.70    0.48 
   0  -1 -10   17.89    0.44 
   1  -1 -10   19.18    0.48 
   2  -1 -10    4.96    0.14 
   3  -1 -10   20.17    0.50 
   4  -1 -10    0.94    0.06 
   5  -1 -10    0.54    0.05 
   6  -1 -10    1.16    0.05 
   7  -1 -10    1.94    0.06 
  -7   0 -10    0.03    0.03 
  -6   0 -10    5.65    0.23 
  -5   0 -10    0.04    0.04 
  -4   0 -10    0.09    0.05 
  -3   0 -10    2.09    0.13 
  -2   0 -10   14.86    0.37 
  -1   0 -10    1.93    0.08 
   0   0 -10   13.24    0.47 
   1   0 -10    1.88    0.10 
   2   0 -10   14.25    0.36 
   3   0 -10    2.07    0.11 
   4   0 -10    0.04    0.03 
   5   0 -10    0.01    0.03 
   6   0 -10    5.96    0.16 
   7   0 -10    0.05    0.02 
  -7   1 -10    2.00    0.09 
  -6   1 -10    1.23    0.08 
  -5   1 -10    0.53    0.07 
  -4   1 -10    1.09    0.07 
  -3   1 -10   20.87    0.50 
  -2   1 -10    5.29    0.20 
  -1   1 -10   19.78    0.68 
   0   1 -10   18.34    0.63 
   1   1 -10   20.44    0.68 
   2   1 -10    4.91    0.20 
   3   1 -10   20.43    0.70 
   4   1 -10    0.83    0.08 
   5   1 -10    0.57    0.07 
   6   1 -10    1.06    0.07 
   7   1 -10    1.96    0.06 
  -7   2 -10    1.30    0.08 
  -6   2 -10    3.56    0.12 
  -5   2 -10   15.14    0.40 
  -4   2 -10    0.26    0.04 
  -3   2 -10    6.17    0.25 
  -2   2 -10    7.30    0.28 
  -1   2 -10   17.12    0.59 
   0   2 -10    2.04    0.11 
   1   2 -10   17.01    0.59 
   2   2 -10    7.92    0.29 
   3   2 -10    5.93    0.24 
   4   2 -10    0.26    0.05 
   5   2 -10   15.98    0.56 
   6   2 -10    3.78    0.11 
   7   2 -10    1.07    0.08 
  -6   3 -10    5.10    0.15 
  -5   3 -10    0.20    0.05 
  -4   3 -10    7.31    0.30 
  -1   3 -10    6.38    0.25 
   0   3 -10   26.04    0.94 
   1   3 -10    6.65    0.26 
   2   3 -10   14.72    0.52 
   3   3 -10    7.52    0.29 
   4   3 -10    7.88    0.30 
   5   3 -10    0.18    0.05 
   6   3 -10    5.49    0.21 
  -6   4 -10    2.50    0.09 
  -5   4 -10    0.60    0.05 
  -4   4 -10    2.28    0.13 
   0   4 -10   49.99    1.85 
   1   4 -10   16.35    0.62 
   2   4 -10   17.43    0.64 
   3   4 -10    2.18    0.14 
   4   4 -10    2.29    0.14 
   5   4 -10    0.50    0.08 
   6   4 -10    2.52    0.13 
  -6   5 -10    5.81    0.24 
  -5   5 -10    2.87    0.09 
   4   5 -10   13.12    0.48 
   5   5 -10    2.77    0.16 
  -5   6 -10    5.00    0.14 
  -4   6 -10    1.05    0.09 
  -4   7 -10    3.31    0.14 
  -2  -9  -9    0.64    0.05 
  -1  -9  -9    3.04    0.12 
   0  -9  -9    0.02    0.03 
   1  -9  -9    2.99    0.12 
   2  -9  -9    0.56    0.06 
  -4  -8  -9    0.98    0.04 
  -3  -8  -9    0.38    0.04 
  -2  -8  -9    0.44    0.04 
  -1  -8  -9    0.64    0.06 
   0  -8  -9    0.08    0.03 
   1  -8  -9    0.60    0.06 
   2  -8  -9    0.41    0.05 
   3  -8  -9    0.42    0.05 
   4  -8  -9    1.01    0.06 
  -5  -7  -9    0.28    0.04 
  -4  -7  -9    0.92    0.05 
  -3  -7  -9    0.88    0.05 
  -2  -7  -9    8.66    0.23 
  -1  -7  -9    0.21    0.03 
   1  -7  -9    0.24    0.04 
   2  -7  -9    8.56    0.32 
   3  -7  -9    0.90    0.07 
   4  -7  -9    0.86    0.06 
   5  -7  -9    0.38    0.07 
  -5  -6  -9    3.73    0.09 
  -4  -6  -9    3.34    0.08 
  -3  -6  -9    7.23    0.20 
  -2  -6  -9   13.02    0.33 
  -1  -6  -9    8.26    0.22 
   0  -6  -9    4.36    0.18 
   1  -6  -9    8.16    0.31 
   2  -6  -9   13.17    0.46 
   3  -6  -9    7.96    0.28 
   4  -6  -9    3.28    0.14 
   5  -6  -9    3.89    0.15 
  -6  -5  -9    6.32    0.17 
  -5  -5  -9    2.18    0.06 
  -4  -5  -9   20.69    0.42 
  -3  -5  -9    8.81    0.19 
  -2  -5  -9   39.49    0.95 
  -1  -5  -9    9.25    0.25 
   0  -5  -9    5.10    0.21 
   1  -5  -9    9.65    0.35 
   2  -5  -9   40.43    1.34 
   3  -5  -9    9.11    0.33 
   4  -5  -9   21.81    0.72 
   5  -5  -9    2.13    0.10 
   6  -5  -9    6.71    0.23 
  -6  -4  -9    5.80    0.16 
  -5  -4  -9    2.33    0.15 
  -4  -4  -9    7.37    0.20 
  -3  -4  -9    2.43    0.09 
  -2  -4  -9    6.66    0.25 
  -1  -4  -9    5.54    0.19 
   0  -4  -9    1.66    0.09 
   1  -4  -9    5.97    0.16 
   2  -4  -9    6.33    0.17 
   3  -4  -9    2.33    0.08 
   4  -4  -9    7.34    0.19 
   5  -4  -9    2.19    0.07 
   6  -4  -9    6.18    0.22 
  -7  -3  -9    3.32    0.09 
  -6  -3  -9    2.09    0.11 
  -5  -3  -9    4.10    0.13 
  -4  -3  -9    6.36    0.18 
  -3  -3  -9    2.10    0.08 
  -2  -3  -9   14.98    0.38 
  -1  -3  -9    1.25    0.09 
   0  -3  -9    0.70    0.04 
   1  -3  -9    1.22    0.05 
   2  -3  -9   15.24    0.37 
   3  -3  -9    2.10    0.07 
   4  -3  -9    6.33    0.17 
   5  -3  -9    4.32    0.12 
   6  -3  -9    2.08    0.07 
   7  -3  -9    3.22    0.13 
  -7  -2  -9    0.69    0.05 
  -6  -2  -9    2.38    0.12 
  -5  -2  -9    1.03    0.11 
  -4  -2  -9    1.15    0.07 
  -3  -2  -9    0.21    0.04 
  -2  -2  -9   14.67    0.37 
  -1  -2  -9    4.01    0.11 
   0  -2  -9    2.20    0.08 
   1  -2  -9    3.97    0.11 
   2  -2  -9   14.40    0.36 
   3  -2  -9    0.25    0.04 
   4  -2  -9    1.27    0.08 
   6  -2  -9    2.42    0.08 
   7  -2  -9    0.66    0.03 
  -7  -1  -9    0.97    0.07 
  -6  -1  -9    3.69    0.16 
  -5  -1  -9    6.43    0.26 
  -4  -1  -9   12.16    0.32 
  -3  -1  -9    5.81    0.17 
  -2  -1  -9    4.45    0.11 
  -1  -1  -9    1.12    0.07 
   0  -1  -9   25.66    0.85 
   1  -1  -9    1.22    0.08 
   2  -1  -9    4.48    0.13 
   3  -1  -9    5.87    0.22 
   4  -1  -9   12.64    0.45 
   5  -1  -9    6.51    0.25 
   6  -1  -9    3.50    0.15 
   7  -1  -9    0.95    0.04 
  -7   0  -9    2.44    0.11 
  -6   0  -9    0.15    0.05 
  -5   0  -9    0.15    0.05 
  -4   0  -9   14.65    0.54 
  -3   0  -9    2.23    0.13 
  -2   0  -9   16.03    0.39 
  -1   0  -9    0.52    0.06 
   0   0  -9    0.02    0.04 
   1   0  -9    0.64    0.07 
   2   0  -9   16.09    0.39 
   3   0  -9    2.44    0.12 
   4   0  -9   15.13    0.53 
   5   0  -9    0.01    0.03 
   6   0  -9    0.15    0.04 
   7   0  -9    2.22    0.07 
  -7   1  -9    0.85    0.06 
  -6   1  -9    3.53    0.12 
  -5   1  -9    6.06    0.18 
  -4   1  -9   12.74    0.32 
  -3   1  -9    5.86    0.24 
  -2   1  -9    4.77    0.19 
  -1   1  -9    1.06    0.08 
   0   1  -9   25.19    0.72 
   1   1  -9    1.24    0.09 
   2   1  -9    4.61    0.19 
   3   1  -9    5.72    0.23 
   4   1  -9   12.63    0.45 
   5   1  -9    6.67    0.25 
   6   1  -9    3.44    0.15 
   7   1  -9    0.93    0.04 
  -7   2  -9    0.74    0.05 
  -6   2  -9    2.43    0.13 
  -4   2  -9    1.20    0.10 
  -2   2  -9   14.61    0.51 
  -1   2  -9    3.85    0.17 
   0   2  -9    2.18    0.12 
   1   2  -9    3.68    0.17 
   2   2  -9   14.64    0.52 
   4   2  -9    1.09    0.09 
   6   2  -9    2.48    0.12 
   7   2  -9    0.63    0.04 
  -7   3  -9    3.20    0.11 
  -6   3  -9    2.02    0.08 
  -5   3  -9    4.38    0.13 
  -4   3  -9    6.33    0.26 
  -2   3  -9   14.63    0.54 
  -1   3  -9    1.03    0.12 
   0   3  -9    0.59    0.08 
   1   3  -9    1.12    0.12 
   2   3  -9   15.66    0.54 
   3   3  -9    1.96    0.13 
   4   3  -9    6.82    0.26 
   5   3  -9    4.33    0.19 
   6   3  -9    2.18    0.11 
   7   3  -9    3.27    0.13 
  -6   4  -9    5.78    0.16 
  -5   4  -9    1.95    0.09 
  -4   4  -9    7.33    0.29 
   3   4  -9    2.50    0.15 
   4   4  -9    6.99    0.31 
   5   4  -9    2.43    0.13 
   6   4  -9    5.63    0.23 
  -6   5  -9    6.36    0.17 
  -5   5  -9    2.21    0.08 
  -5   6  -9    3.85    0.11 
  -4   6  -9    3.31    0.16 
  -5   7  -9    0.40    0.04 
  -4   7  -9    0.85    0.08 
  -4   8  -9    0.99    0.05 
  -3  -9  -8    0.44    0.04 
  -2  -9  -8    1.16    0.07 
  -1  -9  -8    0.03    0.03 
   0  -9  -8    3.44    0.14 
   1  -9  -8    0.08    0.03 
   2  -9  -8    1.34    0.07 
  -4  -8  -8    1.40    0.05 
  -3  -8  -8    1.69    0.06 
  -2  -8  -8    0.55    0.05 
  -1  -8  -8    5.69    0.16 
   0  -8  -8    4.54    0.19 
   1  -8  -8    5.58    0.21 
   2  -8  -8    0.63    0.06 
   3  -8  -8    1.66    0.08 
   4  -8  -8    1.23    0.07 
  -5  -7  -8    1.34    0.07 
  -4  -7  -8    7.06    0.19 
  -3  -7  -8    6.98    0.29 
  -2  -7  -8   10.39    0.26 
  -1  -7  -8    4.91    0.25 
   0  -7  -8    1.02    0.08 
   2  -7  -8    9.84    0.37 
   4  -7  -8    7.36    0.26 
   5  -7  -8    1.36    0.07 
  -6  -6  -8    1.53    0.08 
  -5  -6  -8    0.94    0.04 
  -4  -6  -8    2.00    0.07 
  -3  -6  -8    3.16    0.19 
  -2  -6  -8    1.59    0.07 
  -1  -6  -8    1.84    0.08 
   0  -6  -8    0.20    0.04 
   1  -6  -8    1.72    0.10 
   2  -6  -8    1.57    0.09 
   4  -6  -8    2.17    0.11 
   5  -6  -8    1.07    0.07 
   6  -6  -8    1.64    0.08 
  -6  -5  -8    0.73    0.04 
  -5  -5  -8    8.78    0.19 
  -4  -5  -8    6.34    0.26 
  -3  -5  -8    1.49    0.06 
  -2  -5  -8    6.67    0.19 
  -1  -5  -8    0.23    0.03 
   0  -5  -8   11.35    0.40 
   1  -5  -8    0.21    0.04 
   2  -5  -8    7.38    0.26 
   3  -5  -8    1.41    0.10 
   5  -5  -8    8.80    0.32 
   6  -5  -8    0.73    0.06 
  -7  -4  -8    0.74    0.04 
  -6  -4  -8    0.42    0.06 
  -5  -4  -8    3.29    0.11 
  -4  -4  -8    0.82    0.06 
  -3  -4  -8    7.24    0.20 
  -2  -4  -8    6.97    0.28 
  -1  -4  -8    2.56    0.09 
   0  -4  -8    5.23    0.20 
   1  -4  -8    2.40    0.12 
   2  -4  -8    6.67    0.25 
   3  -4  -8    7.20    0.19 
   4  -4  -8    0.82    0.05 
   5  -4  -8    3.54    0.10 
   6  -4  -8    0.45    0.06 
   7  -4  -8    0.83    0.05 
  -7  -3  -8    0.20    0.02 
  -6  -3  -8    0.06    0.04 
  -5  -3  -8    7.29    0.29 
  -4  -3  -8    1.36    0.07 
  -3  -3  -8    5.16    0.21 
  -2  -3  -8    2.78    0.10 
  -1  -3  -8   12.00    0.42 
   0  -3  -8    5.86    0.15 
   1  -3  -8   11.86    0.29 
   2  -3  -8    2.84    0.09 
   3  -3  -8    5.21    0.14 
   4  -3  -8    1.33    0.06 
   5  -3  -8    6.17    0.30 
   6  -3  -8    0.04    0.02 
   7  -3  -8    0.21    0.02 
  -7  -2  -8    1.40    0.08 
  -6  -2  -8    1.58    0.13 
  -5  -2  -8    1.89    0.08 
  -4  -2  -8    0.10    0.03 
  -3  -2  -8    4.73    0.14 
  -2  -2  -8   21.98    0.52 
  -1  -2  -8   13.18    0.45 
   1  -2  -8   12.93    0.47 
   2  -2  -8   21.06    0.51 
   3  -2  -8    4.60    0.18 
   4  -2  -8    0.01    0.03 
   5  -2  -8    2.06    0.10 
   7  -2  -8    1.22    0.05 
  -7  -1  -8    0.09    0.03 
  -6  -1  -8    0.17    0.04 
  -5  -1  -8    2.16    0.12 
  -4  -1  -8    7.16    0.28 
  -3  -1  -8   15.28    0.39 
  -2  -1  -8   18.94    0.64 
   2  -1  -8   18.30    0.64 
   3  -1  -8   15.67    0.55 
   4  -1  -8    6.97    0.27 
   5  -1  -8    2.23    0.11 
   6  -1  -8    0.14    0.04 
   7  -1  -8    0.08    0.03 
  -7   0  -8    2.02    0.08 
  -6   0  -8    1.79    0.11 
  -5   0  -8    0.30    0.05 
  -4   0  -8   10.21    0.27 
  -3   0  -8    4.94    0.14 
  -2   0  -8    7.52    0.25 
  -1   0  -8   64.00    2.54 
   0   0  -8    2.52    0.28 
   1   0  -8   71.79    2.58 
   2   0  -8    7.05    0.27 
   3   0  -8    4.50    0.19 
   4   0  -8   10.29    0.37 
   5   0  -8    0.44    0.07 
   6   0  -8    1.84    0.10 
   7   0  -8    2.03    0.10 
  -7   1  -8    0.11    0.03 
  -6   1  -8    0.11    0.04 
  -5   1  -8    2.22    0.09 
  -4   1  -8    7.32    0.20 
  -3   1  -8   15.72    0.56 
  -2   1  -8   18.15    0.57 
  -1   1  -8   10.67    0.75 
   0   1  -8    5.63    0.56 
   1   1  -8    9.98    0.80 
   2   1  -8   19.25    0.58 
   3   1  -8   15.99    0.55 
   4   1  -8    7.10    0.27 
   5   1  -8    2.07    0.12 
   6   1  -8    0.16    0.04 
   7   1  -8    0.12    0.03 
  -7   2  -8    1.19    0.06 
  -6   2  -8    1.88    0.11 
  -5   2  -8    1.98    0.08 
  -4   2  -8    0.08    0.05 
  -2   2  -8   20.26    0.65 
  -1   2  -8   13.30    1.00 
   0   2  -8   27.17    1.52 
   1   2  -8   11.06    1.05 
   2   2  -8   21.69    0.67 
   3   2  -8    4.66    0.20 
   4   2  -8    0.03    0.04 
   5   2  -8    1.79    0.11 
   6   2  -8    1.95    0.12 
   7   2  -8    1.24    0.07 
  -7   3  -8    0.24    0.03 
  -6   3  -8    0.08    0.03 
  -5   3  -8    8.11    0.22 
  -4   3  -8    1.28    0.11 
  -2   3  -8    2.45    0.17 
  -1   3  -8   11.38    1.23 
   0   3  -8    5.51    0.92 
   1   3  -8   11.27    1.64 
   2   3  -8    2.55    0.16 
   3   3  -8    5.41    0.22 
   4   3  -8    1.25    0.11 
   5   3  -8    7.24    0.34 
   6   3  -8    0.05    0.04 
   7   3  -8    0.22    0.04 
  -7   4  -8    0.82    0.05 
  -6   4  -8    0.46    0.05 
  -5   4  -8    3.66    0.11 
   3   4  -8    7.44    0.31 
   4   4  -8    0.79    0.12 
   5   4  -8    2.96    0.17 
   6   4  -8    0.35    0.06 
   7   4  -8    0.97    0.08 
  -6   5  -8    0.68    0.07 
  -5   5  -8    9.00    0.23 
  -6   6  -8    1.56    0.06 
  -5   6  -8    0.91    0.06 
  -5   7  -8    1.42    0.06 
  -4   7  -8    7.14    0.27 
  -4   8  -8    1.18    0.09 
  -3   9  -8    0.35    0.06 
  -3  -9  -7    1.08    0.05 
  -2  -9  -7    2.83    0.09 
  -1  -9  -7    0.52    0.04 
   0  -9  -7    5.99    0.22 
   1  -9  -7    0.48    0.06 
   2  -9  -7    2.88    0.12 
  -4  -8  -7    0.17    0.02 
  -3  -8  -7    4.35    0.12 
  -2  -8  -7    2.91    0.09 
  -1  -8  -7    2.56    0.12 
   0  -8  -7   10.33    0.37 
   1  -8  -7    2.52    0.12 
   2  -8  -7    2.79    0.13 
   3  -8  -7    4.18    0.17 
   4  -8  -7    0.16    0.03 
  -5  -7  -7    5.59    0.21 
  -4  -7  -7    3.29    0.08 
  -3  -7  -7    0.24    0.03 
  -1  -7  -7   14.30    0.36 
   0  -7  -7    5.49    0.16 
   1  -7  -7   15.31    0.51 
   3  -7  -7    0.18    0.04 
   4  -7  -7    3.32    0.14 
   5  -7  -7    5.32    0.20 
  -6  -6  -7    1.30    0.05 
  -5  -6  -7    1.18    0.05 
  -4  -6  -7    1.21    0.05 
  -3  -6  -7   10.60    0.22 
  -2  -6  -7    6.91    0.16 
  -1  -6  -7    9.96    0.26 
   0  -6  -7   27.60    0.94 
   1  -6  -7   10.30    0.36 
   2  -6  -7    7.43    0.27 
   3  -6  -7   10.97    0.38 
   4  -6  -7    1.07    0.08 
   5  -6  -7    1.18    0.08 
   6  -6  -7    1.46    0.07 
  -6  -5  -7    1.93    0.07 
  -5  -5  -7    0.98    0.05 
  -4  -5  -7    0.61    0.05 
  -3  -5  -7    0.46    0.05 
  -2  -5  -7   15.77    0.33 
  -1  -5  -7    1.74    0.08 
   0  -5  -7    9.30    0.33 
   1  -5  -7    1.96    0.10 
   2  -5  -7   16.03    0.56 
   3  -5  -7    0.49    0.07 
   4  -5  -7    0.72    0.08 
   5  -5  -7    0.95    0.08 
   6  -5  -7    2.03    0.10 
  -7  -4  -7    1.01    0.04 
  -6  -4  -7    1.38    0.08 
  -5  -4  -7    0.04    0.03 
  -4  -4  -7    2.23    0.09 
  -3  -4  -7    8.55    0.32 
  -2  -4  -7    5.58    0.16 
  -1  -4  -7   27.15    0.92 
   0  -4  -7   11.16    0.40 
   1  -4  -7   27.27    0.92 
   2  -4  -7    5.86    0.23 
   3  -4  -7    8.73    0.22 
   4  -4  -7    2.17    0.08 
   5  -4  -7    0.06    0.03 
   6  -4  -7    1.31    0.05 
   7  -4  -7    0.92    0.06 
  -7  -3  -7    1.32    0.08 
  -6  -3  -7    0.86    0.10 
  -5  -3  -7    2.62    0.09 
  -4  -3  -7    2.40    0.09 
  -3  -3  -7    6.21    0.17 
  -2  -3  -7    8.82    0.32 
  -1  -3  -7   14.17    0.49 
   1  -3  -7   13.87    0.49 
   2  -3  -7    8.54    0.22 
   3  -3  -7    6.11    0.23 
   4  -3  -7    2.60    0.11 
   5  -3  -7    2.59    0.12 
   7  -3  -7    1.39    0.05 
  -7  -2  -7    1.10    0.07 
  -6  -2  -7    2.07    0.11 
  -5  -2  -7    1.89    0.08 
  -4  -2  -7    1.99    0.09 
  -3  -2  -7    0.99    0.07 
   3  -2  -7    1.14    0.07 
   4  -2  -7    1.91    0.10 
   5  -2  -7    1.75    0.10 
   6  -2  -7    2.13    0.10 
   7  -2  -7    1.10    0.06 
  -7  -1  -7    2.54    0.09 
  -6  -1  -7    0.17    0.04 
  -5  -1  -7    7.52    0.23 
  -4  -1  -7   12.02    0.33 
  -3  -1  -7    5.83    0.17 
  -2  -1  -7    3.10    0.42 
   3  -1  -7    6.14    0.23 
   4  -1  -7   12.32    0.46 
   5  -1  -7    8.17    0.30 
   6  -1  -7    0.18    0.04 
   7  -1  -7    2.54    0.11 
  -7   0  -7    1.35    0.07 
  -6   0  -7    0.26    0.04 
  -5   0  -7   47.43    1.19 
  -4   0  -7    1.06    0.06 
  -3   0  -7  148.04    2.93 
  -1   0  -7   20.13    0.94 
   0   0  -7   -0.02    0.08 
   1   0  -7   22.73    1.00 
   3   0  -7  143.93    4.83 
   4   0  -7    0.96    0.08 
   5   0  -7   50.72    1.68 
   6   0  -7    0.37    0.06 
   7   0  -7    1.34    0.08 
  -7   1  -7    2.56    0.09 
  -6   1  -7    0.14    0.03 
  -5   1  -7    8.14    0.22 
  -4   1  -7   13.06    0.33 
  -3   1  -7    6.11    0.24 
  -1   1  -7   36.35    1.53 
   0   1  -7    0.01    0.12 
   1   1  -7   31.51    1.57 
   2   1  -7    3.51    0.53 
   3   1  -7    5.96    0.23 
   4   1  -7   12.83    0.45 
   5   1  -7    8.51    0.31 
   6   1  -7    0.21    0.05 
   7   1  -7    2.55    0.12 
  -7   2  -7    1.10    0.06 
  -6   2  -7    1.83    0.08 
  -5   2  -7    1.89    0.08 
  -4   2  -7    1.79    0.12 
  -2   2  -7    3.25    0.61 
  -1   2  -7   32.49    1.56 
   0   2  -7    2.68    0.44 
   1   2  -7   28.53    1.62 
   2   2  -7    3.01    0.69 
   3   2  -7    1.02    0.10 
   5   2  -7    1.85    0.11 
   6   2  -7    2.16    0.11 
   7   2  -7    1.06    0.07 
  -7   3  -7    1.40    0.06 
  -5   3  -7    2.72    0.10 
  -4   3  -7    2.38    0.13 
  -1   3  -7   14.68    1.13 
   0   3  -7    6.90    0.80 
   1   3  -7   12.87    1.19 
   3   3  -7    6.03    0.26 
   4   3  -7    2.50    0.14 
   5   3  -7    2.54    0.14 
   6   3  -7    1.06    0.09 
   7   3  -7    1.24    0.08 
  -7   4  -7    0.88    0.05 
  -6   4  -7    1.27    0.06 
  -5   4  -7    0.03    0.04 
   4   4  -7    2.19    0.15 
   5   4  -7    0.00    0.06 
   6   4  -7    1.38    0.11 
   7   4  -7    1.03    0.09 
  -6   5  -7    1.98    0.08 
  -5   5  -7    1.07    0.06 
  -6   6  -7    1.40    0.06 
  -5   6  -7    1.28    0.07 
  -5   7  -7    5.56    0.15 
  -4   8  -7    0.16    0.05 
  -2 -10  -6    0.91    0.06 
  -1 -10  -6    1.39    0.08 
  -4  -9  -6    1.23    0.07 
  -3  -9  -6    1.50    0.06 
  -2  -9  -6    1.97    0.07 
  -1  -9  -6    0.19    0.03 
   0  -9  -6    1.16    0.06 
   1  -9  -6    0.14    0.04 
   2  -9  -6    1.98    0.10 
  -5  -8  -6    1.88    0.09 
  -4  -8  -6    1.03    0.05 
  -3  -8  -6    2.28    0.08 
  -2  -8  -6    1.18    0.06 
  -1  -8  -6    1.04    0.06 
   0  -8  -6    2.54    0.09 
   1  -8  -6    0.97    0.07 
   3  -8  -6    2.24    0.11 
   4  -8  -6    1.18    0.07 
  -6  -7  -6    3.30    0.14 
  -5  -7  -6    0.24    0.03 
  -4  -7  -6    1.18    0.05 
  -3  -7  -6    0.14    0.03 
  -2  -7  -6    6.94    0.19 
  -1  -7  -6    2.82    0.10 
   0  -7  -6   15.47    0.38 
   1  -7  -6    2.92    0.13 
   2  -7  -6    6.95    0.26 
   3  -7  -6    0.14    0.04 
   4  -7  -6    1.13    0.08 
   5  -7  -6    0.22    0.04 
  -6  -6  -6    0.87    0.04 
  -5  -6  -6    0.57    0.04 
  -4  -6  -6    6.26    0.14 
  -3  -6  -6    0.18    0.03 
  -2  -6  -6    3.73    0.10 
  -1  -6  -6    0.02    0.03 
   0  -6  -6    0.30    0.04 
   1  -6  -6    0.07    0.04 
   2  -6  -6    3.73    0.16 
   3  -6  -6    0.25    0.05 
   4  -6  -6    6.23    0.24 
   5  -6  -6    0.64    0.07 
   6  -6  -6    0.80    0.06 
  -7  -5  -6    2.19    0.07 
  -6  -5  -6    2.27    0.08 
  -5  -5  -6    3.50    0.09 
  -4  -5  -6    2.53    0.09 
  -3  -5  -6    3.70    0.12 
  -2  -5  -6    3.30    0.09 
  -1  -5  -6    5.16    0.15 
   1  -5  -6    5.00    0.20 
   2  -5  -6    3.15    0.15 
   3  -5  -6    4.03    0.17 
   4  -5  -6    2.63    0.13 
   5  -5  -6    3.42    0.15 
   6  -5  -6    2.38    0.11 
   7  -5  -6    2.09    0.09 
  -7  -4  -6    0.90    0.04 
  -6  -4  -6    8.84    0.30 
  -5  -4  -6    1.61    0.07 
  -4  -4  -6   27.87    0.65 
  -3  -4  -6    6.94    0.18 
  -2  -4  -6   24.89    0.60 
  -1  -4  -6    1.29    0.08 
   0  -4  -6    6.34    0.23 
   1  -4  -6    1.17    0.08 
   2  -4  -6   25.31    0.85 
   3  -4  -6    6.50    0.18 
   4  -4  -6   27.78    0.65 
   5  -4  -6    1.62    0.08 
   6  -4  -6    7.54    0.20 
   7  -4  -6    0.94    0.06 
  -7  -3  -6    3.48    0.14 
  -6  -3  -6    0.05    0.03 
  -5  -3  -6   20.08    0.48 
  -4  -3  -6    2.03    0.08 
  -3  -3  -6   33.00    0.77 
  -2  -3  -6    5.55    0.21 
   2  -3  -6    5.62    0.21 
   3  -3  -6   31.32    1.07 
   4  -3  -6    1.78    0.11 
   5  -3  -6   19.42    0.66 
   6  -3  -6    0.03    0.03 
   7  -3  -6    3.51    0.10 
  -7  -2  -6    1.42    0.06 
  -6  -2  -6    4.95    0.15 
  -5  -2  -6    0.75    0.05 
  -4  -2  -6   10.81    0.28 
  -3  -2  -6    2.05    0.08 
  -2  -2  -6    7.02    0.52 
   3  -2  -6    1.92    0.10 
   4  -2  -6   10.47    0.38 
   5  -2  -6    0.75    0.07 
   6  -2  -6    4.97    0.20 
   7  -2  -6    1.42    0.07 
  -8  -1  -6    0.94    0.05 
  -7  -1  -6    0.72    0.05 
  -5  -1  -6    2.08    0.10 
  -4  -1  -6    4.73    0.12 
  -3  -1  -6   21.62    0.66 
  -2  -1  -6   13.06    0.78 
  -1  -1  -6   55.55    1.45 
   3  -1  -6   21.54    0.74 
   4  -1  -6    4.99    0.19 
   5  -1  -6    2.43    0.11 
   7  -1  -6    0.71    0.06 
   8  -1  -6    0.96    0.04 
  -8   0  -6    0.14    0.04 
  -7   0  -6    4.32    0.13 
  -6   0  -6    0.91    0.08 
  -5   0  -6    0.10    0.03 
  -4   0  -6    0.60    0.05 
  -3   0  -6   41.57    1.16 
  -1   0  -6  162.13    6.00 
   0   0  -6    0.14    0.09 
   1   0  -6  162.47    6.06 
   3   0  -6   41.86    1.39 
   4   0  -6    0.49    0.06 
   5   0  -6    0.04    0.03 
   6   0  -6    0.90    0.08 
   7   0  -6    4.21    0.17 
   8   0  -6    0.10    0.02 
  -8   1  -6    0.95    0.05 
  -7   1  -6    0.65    0.06 
  -5   1  -6    2.37    0.09 
  -4   1  -6    5.29    0.14 
  -1   1  -6   61.68    2.31 
   0   1  -6    0.24    0.17 
   1   1  -6   53.00    2.34 
   2   1  -6   13.97    0.91 
   3   1  -6   22.20    0.75 
   4   1  -6    4.72    0.20 
   5   1  -6    2.26    0.12 
   7   1  -6    0.63    0.07 
   8   1  -6    1.04    0.06 
  -7   2  -6    1.32    0.05 
  -6   2  -6    4.74    0.15 
  -5   2  -6    0.72    0.06 
  -4   2  -6   10.86    0.40 
  -1   2  -6   21.46    1.11 
   0   2  -6    5.14    0.50 
   1   2  -6   17.83    1.13 
   2   2  -6    6.37    0.76 
   3   2  -6    1.93    0.13 
   4   2  -6   10.94    0.40 
   5   2  -6    0.81    0.09 
   6   2  -6    5.28    0.21 
   7   2  -6    1.30    0.09 
  -7   3  -6    3.33    0.09 
  -6   3  -6    0.07    0.03 
  -5   3  -6   19.63    0.48 
  -2   3  -6    5.41    0.78 
  -1   3  -6   51.04    2.28 
   0   3  -6    0.88    0.40 
   1   3  -6   45.97    2.34 
   2   3  -6    4.75    0.88 
   3   3  -6   31.05    1.09 
   4   3  -6    1.89    0.13 
   5   3  -6   19.29    0.68 
   6   3  -6    0.01    0.04 
   7   3  -6    3.52    0.15 
  -7   4  -6    0.79    0.05 
  -6   4  -6    7.49    0.21 
  -5   4  -6    1.71    0.08 
   0   4  -6    5.91    0.89 
   4   4  -6   25.38    0.93 
   5   4  -6    1.43    0.14 
   6   4  -6    7.78    0.30 
   7   4  -6    1.11    0.09 
  -7   5  -6    1.98    0.08 
  -6   5  -6    2.28    0.09 
  -5   5  -6    3.65    0.12 
  -6   6  -6    0.79    0.07 
  -5   6  -6    0.64    0.06 
  -6   7  -6    3.35    0.15 
  -5   7  -6    0.24    0.04 
  -5   8  -6    1.94    0.10 
  -4   8  -6    1.14    0.10 
  -4   9  -6    1.09    0.08 
  -2 -10  -5    1.02    0.06 
  -1 -10  -5    0.43    0.05 
   0 -10  -5   -0.01    0.06 
  -4  -9  -5    0.82    0.06 
  -3  -9  -5    0.55    0.04 
  -2  -9  -5    0.08    0.03 
  -1  -9  -5    1.03    0.06 
   0  -9  -5    0.03    0.03 
   1  -9  -5    1.06    0.06 
  -5  -8  -5    0.40    0.04 
  -4  -8  -5    3.32    0.10 
  -3  -8  -5    0.17    0.03 
  -2  -8  -5    5.31    0.15 
  -1  -8  -5    0.25    0.04 
   1  -8  -5    0.26    0.04 
   2  -8  -5    5.30    0.21 
   3  -8  -5    0.14    0.04 
   4  -8  -5    3.04    0.14 
  -6  -7  -5    1.90    0.08 
  -5  -7  -5    4.03    0.12 
  -4  -7  -5    3.91    0.11 
  -3  -7  -5    2.36    0.11 
  -2  -7  -5    0.11    0.03 
  -1  -7  -5    9.37    0.24 
   0  -7  -5    0.19    0.03 
   1  -7  -5    9.34    0.24 
   2  -7  -5    0.08    0.04 
   4  -7  -5    4.01    0.18 
   5  -7  -5    4.01    0.16 
  -6  -6  -5    0.20    0.03 
  -4  -6  -5    3.68    0.10 
  -3  -6  -5    3.87    0.10 
  -2  -6  -5    4.13    0.10 
  -1  -6  -5    8.64    0.31 
   0  -6  -5    1.30    0.07 
   1  -6  -5    8.02    0.22 
   2  -6  -5    4.17    0.17 
   3  -6  -5    3.76    0.17 
   4  -6  -5    3.55    0.16 
   5  -6  -5    0.08    0.04 
   6  -6  -5    0.22    0.04 
  -7  -5  -5    0.12    0.02 
  -6  -5  -5    0.01    0.02 
  -5  -5  -5    0.37    0.04 
  -4  -5  -5    3.39    0.11 
  -3  -5  -5    3.65    0.11 
  -2  -5  -5   28.04    0.56 
  -1  -5  -5    7.86    0.21 
   0  -5  -5    4.56    0.13 
   1  -5  -5    7.77    0.29 
   2  -5  -5   28.49    0.96 
   3  -5  -5    3.72    0.16 
   4  -5  -5    3.77    0.16 
   5  -5  -5    0.47    0.07 
   6  -5  -5   -0.07    0.03 
   7  -5  -5    0.17    0.06 
  -7  -4  -5    0.93    0.05 
  -6  -4  -5    4.09    0.13 
  -5  -4  -5    5.26    0.13 
  -4  -4  -5    1.18    0.06 
  -3  -4  -5   26.66    0.63 
  -2  -4  -5   23.90    0.57 
  -1  -4  -5   39.80    1.21 
   2  -4  -5   22.84    0.80 
   3  -4  -5   25.15    0.62 
   4  -4  -5    1.31    0.07 
   5  -4  -5    5.07    0.19 
   6  -4  -5    3.67    0.18 
   7  -4  -5    0.86    0.04 
  -7  -3  -5    3.39    0.10 
  -6  -3  -5    3.94    0.12 
  -5  -3  -5    6.75    0.15 
  -4  -3  -5    1.39    0.07 
  -3  -3  -5   31.03    0.67 
  -2  -3  -5   56.21    2.22 
   3  -3  -5   30.59    1.02 
   4  -3  -5    1.35    0.08 
   5  -3  -5    6.11    0.24 
   6  -3  -5    3.84    0.16 
   7  -3  -5    3.34    0.13 
  -8  -2  -5    0.38    0.04 
  -7  -2  -5    1.33    0.06 
  -6  -2  -5    1.07    0.10 
  -5  -2  -5    1.79    0.07 
  -4  -2  -5    5.46    0.13 
  -3  -2  -5    3.62    0.11 
  -2  -2  -5    1.80    0.31 
  -1  -2  -5   58.05    2.02 
   4  -2  -5    5.19    0.20 
   5  -2  -5    1.93    0.10 
   6  -2  -5    1.12    0.08 
   7  -2  -5    1.51    0.08 
   8  -2  -5    0.38    0.03 
  -8  -1  -5    1.39    0.05 
  -7  -1  -5    0.20    0.03 
  -6  -1  -5    1.30    0.08 
  -5  -1  -5    5.75    0.18 
  -4  -1  -5    7.39    0.16 
  -2  -1  -5   12.01    0.71 
  -1  -1  -5   13.23    0.58 
   4  -1  -5    7.46    0.27 
   5  -1  -5    6.40    0.24 
   6  -1  -5    1.38    0.09 
   7  -1  -5    0.15    0.03 
   8  -1  -5    1.30    0.07 
  -8   0  -5    0.32    0.04 
  -7   0  -5    8.46    0.23 
  -6   0  -5    0.01    0.03 
  -5   0  -5   12.27    0.32 
  -4   0  -5   10.79    0.23 
  -3   0  -5    7.48    0.72 
   0   0  -5    0.01    0.05 
   1   0  -5   24.62    1.05 
   4   0  -5   10.73    0.39 
   5   0  -5   13.02    0.45 
   6   0  -5    0.05    0.03 
   7   0  -5    8.79    0.32 
   8   0  -5    0.28    0.04 
  -8   1  -5    1.38    0.06 
  -7   1  -5    0.19    0.04 
  -6   1  -5    1.37    0.07 
  -5   1  -5    6.16    0.17 
  -4   1  -5    7.63    0.20 
   0   1  -5   25.03    1.10 
   1   1  -5   11.88    0.74 
   2   1  -5   11.95    0.81 
   4   1  -5    7.57    0.28 
   5   1  -5    6.36    0.24 
   6   1  -5    1.46    0.09 
   7   1  -5    0.10    0.03 
   8   1  -5    1.44    0.07 
  -8   2  -5    0.43    0.07 
  -7   2  -5    1.20    0.05 
  -6   2  -5    1.17    0.08 
  -5   2  -5    1.84    0.08 
  -4   2  -5    5.21    0.22 
  -1   2  -5   61.16    2.37 
   0   2  -5    8.14    0.59 
   1   2  -5   56.92    2.44 
   2   2  -5    1.42    0.42 
   3   2  -5    3.49    0.70 
   4   2  -5    5.39    0.22 
   5   2  -5    1.77    0.11 
   7   2  -5    1.37    0.09 
   8   2  -5    0.38    0.05 
  -7   3  -5    3.29    0.09 
  -6   3  -5    3.98    0.12 
  -5   3  -5    6.49    0.18 
  -1   3  -5   62.67    2.60 
   0   3  -5  148.76    5.56 
   1   3  -5   58.40    2.67 
   2   3  -5   48.47    2.62 
   4   3  -5    1.37    0.12 
   5   3  -5    6.68    0.26 
   6   3  -5    3.92    0.18 
   7   3  -5    3.42    0.15 
  -7   4  -5    0.80    0.06 
  -6   4  -5    4.16    0.13 
  -5   4  -5    5.40    0.15 
  -1   4  -5   35.01    1.93 
   0   4  -5   38.11    2.03 
   1   4  -5   32.48    2.00 
   3   4  -5   24.47    0.88 
   5   4  -5    4.83    0.23 
   6   4  -5    4.37    0.20 
   7   4  -5    0.90    0.12 
  -7   5  -5    0.09    0.03 
  -6   5  -5   -0.04    0.03 
  -5   5  -5    0.54    0.07 
  -6   6  -5    0.26    0.05 
  -5   6  -5    0.02    0.04 
  -6   7  -5    1.83    0.10 
  -5   7  -5    4.03    0.13 
  -4   8  -5    3.35    0.16 
  -4   9  -5    0.71    0.07 
  -2 -10  -4    0.94    0.06 
  -1 -10  -4    0.47    0.05 
   0 -10  -4    0.11    0.04 
  -4  -9  -4    1.31    0.07 
  -3  -9  -4    0.33    0.04 
  -2  -9  -4    0.86    0.05 
  -1  -9  -4    0.07    0.03 
   0  -9  -4    0.46    0.05 
   1  -9  -4    0.03    0.04 
  -5  -8  -4    4.02    0.16 
  -4  -8  -4    8.31    0.22 
  -3  -8  -4    7.46    0.29 
  -2  -8  -4    2.64    0.09 
  -1  -8  -4    6.00    0.17 
   0  -8  -4    1.07    0.06 
   1  -8  -4    5.99    0.17 
   2  -8  -4    2.71    0.13 
   3  -8  -4    7.33    0.28 
  -6  -7  -4    0.73    0.05 
  -5  -7  -4    0.85    0.05 
  -4  -7  -4    5.00    0.12 
  -3  -7  -4    5.14    0.12 
  -2  -7  -4    5.40    0.15 
  -1  -7  -4   11.03    0.29 
   0  -7  -4    0.13    0.03 
   1  -7  -4   11.05    0.28 
   2  -7  -4    5.22    0.16 
   3  -7  -4    5.20    0.21 
   4  -7  -4    4.90    0.22 
   5  -7  -4    0.83    0.08 
  -6  -6  -4    2.29    0.08 
  -5  -6  -4    0.07    0.02 
  -4  -6  -4    4.37    0.11 
  -3  -6  -4    4.14    0.10 
  -2  -6  -4    3.15    0.08 
  -1  -6  -4    7.60    0.20 
   0  -6  -4    2.27    0.08 
   1  -6  -4    7.82    0.20 
   3  -6  -4    4.22    0.18 
   4  -6  -4    4.18    0.18 
   6  -6  -4    2.33    0.11 
  -7  -5  -4    0.25    0.03 
  -6  -5  -4    1.68    0.06 
  -5  -5  -4    8.89    0.19 
  -4  -5  -4    6.59    0.15 
  -3  -5  -4   24.42    0.83 
  -2  -5  -4    1.16    0.05 
  -1  -5  -4    6.74    0.18 
   0  -5  -4    4.98    0.20 
   1  -5  -4    6.67    0.25 
   2  -5  -4    1.05    0.09 
   3  -5  -4   24.69    0.82 
   4  -5  -4    6.44    0.25 
   5  -5  -4    9.11    0.34 
   6  -5  -4    1.68    0.10 
   7  -5  -4    0.28    0.04 
  -7  -4  -4    2.79    0.07 
  -6  -4  -4    0.62    0.06 
  -5  -4  -4    7.64    0.17 
  -4  -4  -4    0.61    0.06 
  -3  -4  -4    0.92    0.06 
  -2  -4  -4   12.28    0.38 
   2  -4  -4   11.74    0.42 
   3  -4  -4    0.93    0.07 
   4  -4  -4    0.44    0.05 
   5  -4  -4    7.40    0.28 
   6  -4  -4    0.75    0.06 
   7  -4  -4    2.71    0.08 
  -8  -3  -4    0.36    0.05 
  -7  -3  -4    0.76    0.04 
  -6  -3  -4    1.56    0.09 
  -5  -3  -4    2.78    0.08 
  -4  -3  -4   11.22    0.23 
  -3  -3  -4    4.53    0.13 
  -2  -3  -4   10.84    0.70 
   4  -3  -4   11.02    0.39 
   5  -3  -4    2.57    0.12 
   6  -3  -4    1.48    0.11 
   7  -3  -4    0.74    0.06 
   8  -3  -4    0.34    0.03 
  -8  -2  -4    3.09    0.08 
  -7  -2  -4    1.07    0.06 
  -6  -2  -4    3.35    0.11 
  -5  -2  -4    1.34    0.06 
  -4  -2  -4   10.12    0.22 
  -3  -2  -4    0.17    0.47 
  -2  -2  -4    9.06    0.62 
  -1  -2  -4    1.44    0.16 
   4  -2  -4   10.26    0.36 
   5  -2  -4    1.31    0.08 
   6  -2  -4    3.30    0.14 
   7  -2  -4    0.96    0.07 
   8  -2  -4    2.91    0.12 
  -8  -1  -4    0.32    0.03 
  -7  -1  -4    1.96    0.08 
  -6  -1  -4    0.75    0.06 
  -5  -1  -4    1.03    0.07 
  -4  -1  -4    7.98    0.18 
  -2  -1  -4   19.68    0.98 
  -1  -1  -4   36.19    1.37 
   4  -1  -4    8.36    0.30 
   5  -1  -4    1.08    0.07 
   6  -1  -4    0.73    0.07 
   7  -1  -4    2.15    0.11 
   8  -1  -4    0.24    0.04 
  -8   0  -4    1.18    0.08 
  -7   0  -4    0.74    0.06 
  -6   0  -4    0.02    0.03 
  -5   0  -4    0.28    0.06 
  -4   0  -4    0.08    0.03 
   0   0  -4  331.38   11.67 
   1   0  -4  183.26    6.88 
   4   0  -4    0.06    0.04 
   5   0  -4    0.24    0.04 
   6   0  -4    0.08    0.04 
   7   0  -4    0.79    0.11 
   8   0  -4    1.26    0.07 
  -8   1  -4    0.30    0.04 
  -7   1  -4    1.72    0.06 
  -6   1  -4    0.80    0.06 
  -5   1  -4    1.23    0.07 
  -4   1  -4    8.85    0.22 
   0   1  -4    2.30    0.23 
   1   1  -4   35.37    1.54 
   2   1  -4   20.64    1.06 
   4   1  -4    8.58    0.31 
   5   1  -4    1.17    0.09 
   6   1  -4    0.73    0.08 
   7   1  -4    1.93    0.10 
   8   1  -4    0.31    0.04 
  -8   2  -4    2.95    0.13 
  -7   2  -4    0.95    0.05 
  -6   2  -4    3.23    0.11 
  -5   2  -4    1.25    0.07 
  -4   2  -4   10.25    0.37 
   0   2  -4   20.78    1.01 
   1   2  -4    1.46    0.29 
   2   2  -4    8.40    0.74 
   3   2  -4    0.18    0.27 
   4   2  -4   10.03    0.26 
   5   2  -4    1.29    0.10 
   6   2  -4    3.28    0.15 
   7   2  -4    1.01    0.08 
   8   2  -4    3.17    0.13 
  -8   3  -4    0.38    0.06 
  -7   3  -4    0.68    0.05 
  -6   3  -4    1.41    0.11 
  -5   3  -4    2.65    0.10 
  -1   3  -4   40.21    1.81 
   0   3  -4    1.43    0.33 
   1   3  -4   37.84    1.88 
   2   3  -4    9.10    0.91 
   3   3  -4    4.42    0.18 
   4   3  -4   10.96    0.29 
   5   3  -4    2.67    0.15 
   6   3  -4    1.20    0.10 
   7   3  -4    0.85    0.08 
   8   3  -4    0.38    0.06 
  -7   4  -4    2.70    0.10 
  -6   4  -4    0.87    0.07 
  -5   4  -4    8.11    0.21 
  -2   4  -4   11.43    1.07 
   0   4  -4    3.36    0.57 
   1   4  -4  104.59    4.37 
   2   4  -4   10.18    1.28 
   3   4  -4    0.95    0.08 
   4   4  -4    0.43    0.06 
   6   4  -4    0.91    0.12 
   7   4  -4    2.97    0.15 
  -7   5  -4    0.25    0.04 
  -6   5  -4    1.75    0.08 
   2   5  -4    1.03    0.10 
   3   5  -4   23.12    0.82 
   4   5  -4    6.40    0.25 
  -6   6  -4    2.46    0.12 
  -5   6  -4    0.14    0.04 
   2   6  -4    3.04    0.15 
   3   6  -4    3.88    0.17 
  -6   7  -4    0.70    0.07 
  -5   7  -4    0.72    0.08 
  -5   8  -4    4.29    0.17 
  -4   8  -4    8.26    0.33 
  -4   9  -4    1.31    0.09 
  -3 -10  -3    0.95    0.06 
  -2 -10  -3    0.10    0.03 
  -1 -10  -3    1.29    0.07 
   0 -10  -3    0.57    0.06 
   1 -10  -3    1.26    0.08 
  -4  -9  -3    1.66    0.08 
  -3  -9  -3    0.29    0.05 
  -2  -9  -3    2.90    0.10 
   1  -9  -3    0.11    0.04 
   2  -9  -3    2.97    0.14 
  -5  -8  -3    1.91    0.09 
  -4  -8  -3    1.26    0.06 
  -3  -8  -3    4.12    0.13 
  -2  -8  -3    5.71    0.25 
  -1  -8  -3   36.27    0.87 
   0  -8  -3   12.68    0.32 
   1  -8  -3   36.15    0.87 
   2  -8  -3    5.65    0.24 
  -6  -7  -3    2.40    0.10 
  -5  -7  -3    4.76    0.13 
  -4  -7  -3    0.02    0.02 
  -3  -7  -3   19.17    0.39 
  -2  -7  -3    2.53    0.09 
  -1  -7  -3    6.53    0.18 
   0  -7  -3    5.69    0.16 
   1  -7  -3    6.39    0.18 
   2  -7  -3    2.56    0.09 
   3  -7  -3   18.36    0.66 
   4  -7  -3   -0.08    0.05 
  -7  -6  -3    0.31    0.05 
  -6  -6  -3    0.17    0.02 
  -5  -6  -3    5.39    0.15 
  -4  -6  -3    0.20    0.03 
  -3  -6  -3    3.47    0.09 
  -2  -6  -3    3.44    0.11 
  -1  -6  -3    6.56    0.18 
   0  -6  -3   16.07    0.40 
   1  -6  -3    6.54    0.18 
   2  -6  -3    3.72    0.12 
   3  -6  -3    3.48    0.16 
   4  -6  -3    0.13    0.05 
   5  -6  -3    5.07    0.22 
   6  -6  -3    0.21    0.04 
  -7  -5  -3    0.81    0.04 
  -6  -5  -3    2.57    0.09 
  -5  -5  -3    1.05    0.05 
  -4  -5  -3    6.68    0.13 
  -3  -5  -3    4.83    0.10 
  -2  -5  -3    1.72    0.06 
  -1  -5  -3   27.77    0.66 
   2  -5  -3    1.69    0.11 
   3  -5  -3    5.16    0.20 
   4  -5  -3    6.75    0.18 
   5  -5  -3    1.02    0.05 
   6  -5  -3    2.43    0.08 
   7  -5  -3    0.78    0.09 
  -7  -4  -3    0.41    0.04 
  -6  -4  -3    0.34    0.03 
  -5  -4  -3   15.02    0.31 
  -4  -4  -3   12.41    0.45 
  -3  -4  -3   42.82    0.93 
   3  -4  -3   45.93    1.43 
   4  -4  -3   12.31    0.42 
   5  -4  -3   14.81    0.51 
   6  -4  -3    0.32    0.05 
   7  -4  -3    0.41    0.04 
  -8  -3  -3    2.32    0.07 
  -7  -3  -3    3.09    0.08 
  -6  -3  -3    6.22    0.18 
  -5  -3  -3    1.89    0.07 
  -4  -3  -3    1.42    0.06 
  -3  -3  -3    1.52    0.07 
  -2  -3  -3   19.86    1.04 
  -1  -3  -3   31.79    1.31 
   4  -3  -3    1.51    0.08 
   5  -3  -3    1.90    0.09 
   6  -3  -3    6.41    0.24 
   7  -3  -3    3.28    0.13 
   8  -3  -3    2.15    0.07 
  -8  -2  -3    0.16    0.04 
  -7  -2  -3    0.95    0.06 
  -6  -2  -3    0.86    0.06 
  -5  -2  -3    0.38    0.05 
  -4  -2  -3    5.04    0.12 
  -3  -2  -3    2.46    0.60 
  -2  -2  -3    8.84    0.62 
  -1  -2  -3   69.42    2.59 
   4  -2  -3    5.15    0.19 
   5  -2  -3    0.39    0.05 
   6  -2  -3    0.97    0.07 
   7  -2  -3    0.83    0.07 
   8  -2  -3    0.30    0.04 
  -8  -1  -3    1.68    0.06 
  -6  -1  -3    6.67    0.19 
  -5  -1  -3    0.67    0.07 
  -4  -1  -3    7.44    0.17 
  -2  -1  -3   15.02    0.83 
  -1  -1  -3    1.74    0.18 
   4  -1  -3    7.74    0.28 
   6  -1  -3    6.81    0.25 
   7  -1  -3    0.94    0.07 
   8  -1  -3    1.77    0.08 
  -8   0  -3    8.02    0.21 
  -7   0  -3    0.26    0.04 
  -6   0  -3   26.76    0.55 
  -5   0  -3    0.02    0.03 
  -4   0  -3   16.78    0.40 
   0   0  -3    0.01    0.03 
   1   0  -3    1.21    0.16 
   4   0  -3   16.92    0.56 
   5   0  -3    0.03    0.03 
   6   0  -3   28.76    0.94 
   7   0  -3    0.14    0.03 
   8   0  -3    7.47    0.28 
  -8   1  -3    1.67    0.09 
  -7   1  -3    0.86    0.06 
  -6   1  -3    6.11    0.18 
  -5   1  -3    0.92    0.09 
  -4   1  -3    8.07    0.20 
   0   1  -3    2.97    0.24 
   1   1  -3    1.66    0.24 
   2   1  -3   16.70    0.90 
   4   1  -3    7.38    0.20 
   5   1  -3    0.78    0.07 
   6   1  -3    6.87    0.26 
   8   1  -3    1.66    0.08 
  -8   2  -3    0.15    0.04 
  -7   2  -3    0.89    0.05 
  -6   2  -3    0.90    0.07 
  -5   2  -3    0.44    0.08 
  -4   2  -3    5.28    0.21 
   0   2  -3   17.45    0.84 
   1   2  -3   69.58    2.81 
   2   2  -3    8.62    0.72 
   3   2  -3    2.65    0.52 
   4   2  -3    4.89    0.14 
   5   2  -3    0.40    0.05 
   6   2  -3    0.80    0.08 
   7   2  -3    0.99    0.08 
   8   2  -3    0.21    0.04 
  -8   3  -3    2.49    0.11 
  -7   3  -3    2.91    0.11 
  -6   3  -3    6.53    0.20 
  -5   3  -3    1.99    0.09 
  -1   3  -3   33.38    1.51 
   0   3  -3   67.80    2.64 
   1   3  -3   31.82    1.57 
   2   3  -3   16.41    1.18 
   3   3  -3    1.78    0.63 
   4   3  -3    1.44    0.07 
   5   3  -3    1.86    0.08 
   7   3  -3    2.92    0.14 
   8   3  -3    2.40    0.11 
  -7   4  -3    0.38    0.05 
  -6   4  -3    0.43    0.05 
  -5   4  -3   14.86    0.38 
  -1   4  -3    2.65    0.48 
   0   4  -3    5.87    0.64 
   1   4  -3    2.76    0.56 
   2   4  -3   29.25    1.94 
   3   4  -3   42.30    1.43 
   5   4  -3   14.52    0.52 
   7   4  -3    0.52    0.08 
  -7   5  -3    0.75    0.05 
  -6   5  -3    2.55    0.13 
  -5   5  -3    1.01    0.08 
   0   5  -3   10.21    1.08 
   3   5  -3    4.74    0.20 
   4   5  -3    6.84    0.26 
   5   5  -3    1.05    0.07 
  -7   6  -3    0.34    0.04 
  -6   6  -3    0.16    0.05 
  -5   6  -3    5.56    0.18 
   3   6  -3    3.27    0.15 
   4   6  -3    0.17    0.04 
  -6   7  -3    2.29    0.12 
  -5   7  -3    4.97    0.20 
   2   7  -3    2.63    0.16 
   3   7  -3   18.62    0.66 
  -5   8  -3    1.86    0.11 
  -4   9  -3    1.59    0.11 
  -3 -10  -2    0.72    0.05 
  -2 -10  -2    0.05    0.03 
  -1 -10  -2    1.56    0.08 
   0 -10  -2    1.28    0.07 
   1 -10  -2    1.63    0.09 
   2 -10  -2   -0.04    0.06 
  -4  -9  -2    0.48    0.05 
  -3  -9  -2    0.68    0.06 
  -2  -9  -2    3.21    0.14 
  -1  -9  -2    2.03    0.10 
   0  -9  -2    0.78    0.07 
   2  -9  -2    3.13    0.14 
  -5  -8  -2   12.41    0.43 
  -4  -8  -2    7.30    0.27 
  -3  -8  -2   14.54    0.36 
  -2  -8  -2    9.25    0.34 
  -1  -8  -2   15.12    0.38 
   0  -8  -2    0.79    0.08 
   1  -8  -2   15.15    0.54 
   2  -8  -2    9.14    0.36 
  -6  -7  -2    2.22    0.10 
  -5  -7  -2    7.83    0.21 
  -4  -7  -2    1.14    0.04 
  -3  -7  -2   15.59    0.32 
  -2  -7  -2    6.08    0.14 
  -1  -7  -2   26.87    0.69 
   0  -7  -2   20.39    0.50 
   1  -7  -2   29.26    0.69 
   2  -7  -2    6.03    0.24 
   3  -7  -2   14.99    0.55 
  -7  -6  -2    1.14    0.07 
  -6  -6  -2    1.07    0.04 
  -5  -6  -2    0.12    0.02 
  -4  -6  -2    0.27    0.03 
  -3  -6  -2    1.62    0.05 
  -2  -6  -2    7.12    0.14 
  -1  -6  -2    5.50    0.15 
   0  -6  -2   12.98    0.33 
   1  -6  -2    5.27    0.15 
   2  -6  -2    7.35    0.20 
   3  -6  -2    1.77    0.17 
   4  -6  -2    0.11    0.06 
   5  -6  -2    0.13    0.05 
  -7  -5  -2    1.49    0.05 
  -6  -5  -2    0.79    0.06 
  -5  -5  -2    2.85    0.08 
  -4  -5  -2    1.81    0.06 
  -3  -5  -2    6.75    0.13 
  -2  -5  -2   11.81    0.24 
  -1  -5  -2   18.72    0.64 
   2  -5  -2   11.48    0.44 
   3  -5  -2    6.92    0.27 
   4  -5  -2    1.92    0.08 
   5  -5  -2    2.74    0.09 
   6  -5  -2    0.72    0.05 
   7  -5  -2    1.54    0.13 
  -7  -4  -2    0.68    0.04 
  -6  -4  -2    1.93    0.06 
  -5  -4  -2    1.24    0.07 
  -4  -4  -2   15.28    0.31 
  -3  -4  -2   18.09    0.41 
  -2  -4  -2   19.72    1.16 
   4  -4  -2   14.84    0.52 
   5  -4  -2    1.32    0.07 
   6  -4  -2    1.82    0.09 
   7  -4  -2    0.71    0.04 
  -8  -3  -2    0.44    0.04 
  -7  -3  -2    1.45    0.05 
  -6  -3  -2    0.21    0.03 
  -5  -3  -2    8.61    0.23 
  -4  -3  -2    7.03    0.15 
  -3  -3  -2   30.73    1.73 
  -2  -3  -2    7.16    0.60 
  -1  -3  -2    7.51    0.47 
   4  -3  -2    6.30    0.24 
   5  -3  -2    8.24    0.30 
   6  -3  -2    0.17    0.03 
   7  -3  -2    1.46    0.08 
   8  -3  -2    0.38    0.03 
  -8  -2  -2    0.45    0.06 
  -7  -2  -2    0.76    0.06 
  -6  -2  -2    1.66    0.08 
  -5  -2  -2    0.13    0.06 
  -4  -2  -2    5.75    0.13 
  -3  -2  -2    6.93    0.80 
  -2  -2  -2   45.31    1.99 
  -1  -2  -2   24.96    1.01 
   4  -2  -2    5.59    0.21 
   5  -2  -2    0.11    0.03 
   6  -2  -2    1.64    0.09 
   8  -2  -2    0.38    0.04 
  -8  -1  -2    2.13    0.11 
  -7  -1  -2    0.46    0.08 
  -6  -1  -2    9.22    0.20 
  -5  -1  -2    8.12    0.18 
  -4  -1  -2    4.13    0.11 
  -2  -1  -2   10.04    0.63 
  -1  -1  -2  162.07    6.29 
   4  -1  -2    4.46    0.17 
   5  -1  -2    8.57    0.30 
   6  -1  -2    9.71    0.34 
   7  -1  -2    0.45    0.06 
   8  -1  -2    2.21    0.10 
  -8   0  -2    4.92    0.19 
  -7   0  -2    4.28    0.13 
  -6   0  -2    0.09    0.03 
  -5   0  -2   26.09    0.64 
  -4   0  -2   47.79    1.28 
   0   0  -2   18.76    0.70 
   1   0  -2   26.19    0.96 
   4   0  -2   45.89    1.49 
   5   0  -2   26.98    0.89 
   6   0  -2    0.03    0.03 
   7   0  -2    4.20    0.18 
   8   0  -2    4.55    0.18 
  -8   1  -2    2.40    0.11 
  -7   1  -2    0.37    0.04 
  -6   1  -2    9.44    0.21 
  -5   1  -2    8.48    0.22 
  -4   1  -2    4.98    0.18 
   0   1  -2   50.53    1.93 
   1   1  -2  160.78    6.55 
   2   1  -2   10.80    0.66 
   4   1  -2    4.08    0.19 
   5   1  -2    8.52    0.21 
   6   1  -2    9.09    0.34 
   7   1  -2    0.44    0.07 
   8   1  -2    2.04    0.10 
  -8   2  -2    0.56    0.06 
  -7   2  -2    0.67    0.11 
  -6   2  -2    1.63    0.08 
  -5   2  -2    0.12    0.04 
  -4   2  -2    5.44    0.24 
   0   2  -2    1.28    0.19 
   1   2  -2   22.78    1.12 
   2   2  -2   45.48    2.07 
   3   2  -2    7.68    0.74 
   4   2  -2    5.87    0.16 
   5   2  -2    0.10    0.03 
   6   2  -2    1.47    0.10 
   7   2  -2    0.76    0.08 
   8   2  -2    0.44    0.06 
  -8   3  -2    0.38    0.04 
  -7   3  -2    1.29    0.07 
  -6   3  -2    0.18    0.04 
  -5   3  -2    8.57    0.23 
  -4   3  -2    6.46    0.27 
   0   3  -2   12.92    0.76 
   1   3  -2    6.92    0.59 
   2   3  -2    6.63    0.69 
   3   3  -2   32.90    1.84 
   4   3  -2    6.67    0.25 
   5   3  -2    8.28    0.24 
   6   3  -2    0.22    0.03 
   7   3  -2    1.53    0.10 
   8   3  -2    0.28    0.05 
  -7   4  -2    0.65    0.06 
  -6   4  -2    1.76    0.11 
  -5   4  -2    1.26    0.08 
  -1   4  -2   17.02    1.05 
   0   4  -2   37.64    1.78 
   1   4  -2   16.37    1.12 
   2   4  -2   17.38    1.34 
   3   4  -2   17.00    0.61 
   4   4  -2   14.85    0.53 
   5   4  -2    1.34    0.08 
   6   4  -2    1.81    0.09 
  -7   5  -2    1.30    0.07 
  -5   5  -2    2.82    0.15 
  -1   5  -2   19.19    1.37 
   0   5  -2    0.21    0.34 
   1   5  -2   17.43    1.44 
   3   5  -2    6.44    0.26 
   4   5  -2    1.82    0.10 
   5   5  -2    2.81    0.13 
  -7   6  -2    1.01    0.06 
  -6   6  -2    1.04    0.09 
  -5   6  -2    0.18    0.05 
   3   6  -2    1.55    0.11 
   4   6  -2    0.19    0.04 
   5   6  -2    0.10    0.03 
  -6   7  -2    2.10    0.11 
  -5   7  -2    8.30    0.30 
   3   7  -2   15.19    0.55 
   4   7  -2    1.05    0.08 
  -5   8  -2   12.10    0.44 
   0 -11  -1    3.07    0.12 
  -3 -10  -1    0.31    0.04 
  -2 -10  -1    0.22    0.04 
  -1 -10  -1    0.65    0.06 
   0 -10  -1    0.57    0.06 
   1 -10  -1    0.72    0.06 
   2 -10  -1    0.19    0.04 
  -4  -9  -1    0.06    0.03 
  -3  -9  -1    0.34    0.06 
  -2  -9  -1    1.33    0.10 
  -1  -9  -1    1.10    0.08 
   0  -9  -1    2.48    0.12 
   1  -9  -1    1.17    0.08 
   2  -9  -1    1.29    0.09 
   3  -9  -1    0.40    0.07 
  -5  -8  -1    0.81    0.06 
  -4  -8  -1   12.39    0.30 
  -3  -8  -1   23.25    0.46 
  -2  -8  -1   13.24    0.48 
  -1  -8  -1   22.93    0.80 
   0  -8  -1    3.55    0.16 
   1  -8  -1   23.33    0.80 
   2  -8  -1   13.23    0.48 
   3  -8  -1   22.33    0.79 
  -6  -7  -1    7.83    0.27 
  -5  -7  -1   13.22    0.33 
  -4  -7  -1   14.47    0.30 
  -3  -7  -1    6.87    0.15 
  -2  -7  -1   14.29    0.29 
  -1  -7  -1   16.01    0.41 
   0  -7  -1   18.41    0.65 
   1  -7  -1   17.04    0.58 
   2  -7  -1   14.17    0.51 
   3  -7  -1    6.36    0.26 
  -7  -6  -1    0.22    0.04 
  -6  -6  -1    1.24    0.05 
  -5  -6  -1    0.67    0.04 
  -4  -6  -1    5.72    0.11 
  -3  -6  -1    1.57    0.05 
  -2  -6  -1    3.27    0.08 
  -1  -6  -1   20.79    0.42 
   0  -6  -1    0.51    0.07 
   1  -6  -1   21.69    0.74 
   2  -6  -1    3.43    0.15 
   4  -6  -1    5.47    0.23 
  -7  -5  -1    0.88    0.04 
  -6  -5  -1    1.45    0.07 
  -5  -5  -1    4.25    0.11 
  -4  -5  -1    4.91    0.10 
  -3  -5  -1    0.47    0.04 
  -2  -5  -1    0.29    0.03 
  -1  -5  -1    9.29    0.34 
   2  -5  -1    0.31    0.04 
   3  -5  -1    0.50    0.04 
   4  -5  -1    4.24    0.14 
   5  -5  -1    4.40    0.13 
   6  -5  -1    1.38    0.06 
  -7  -4  -1    1.99    0.06 
  -6  -4  -1    2.96    0.08 
  -5  -4  -1    0.37    0.04 
  -4  -4  -1    0.99    0.05 
  -3  -4  -1   19.17    0.38 
  -2  -4  -1   16.14    1.05 
   3  -4  -1   19.43    0.65 
   4  -4  -1    0.91    0.06 
   5  -4  -1    0.38    0.05 
   6  -4  -1    2.93    0.12 
   7  -4  -1    1.91    0.07 
  -8  -3  -1    0.13    0.02 
  -7  -3  -1    0.08    0.02 
  -6  -3  -1    0.19    0.03 
  -5  -3  -1    0.72    0.06 
  -4  -3  -1    5.76    0.13 
  -3  -3  -1    8.00    0.85 
  -2  -3  -1    2.46    0.37 
  -1  -3  -1    9.73    0.59 
   4  -3  -1    5.60    0.15 
   5  -3  -1    0.56    0.05 
   6  -3  -1    0.14    0.03 
   7  -3  -1    0.08    0.03 
   8  -3  -1    0.14    0.02 
  -8  -2  -1    0.20    0.03 
  -7  -2  -1    0.96    0.05 
  -6  -2  -1    2.07    0.08 
  -5  -2  -1    3.66    0.18 
  -4  -2  -1   11.27    0.23 
  -3  -2  -1   19.00    1.24 
  -2  -2  -1   11.42    0.72 
  -1  -2  -1   48.58    1.79 
   4  -2  -1   10.94    0.38 
   6  -2  -1    2.04    0.10 
   7  -2  -1    0.87    0.07 
   8  -2  -1    0.26    0.04 
  -8  -1  -1    4.76    0.18 
  -7  -1  -1    7.72    0.30 
  -6  -1  -1   15.01    0.30 
  -5  -1  -1   21.39    0.43 
  -4  -1  -1    0.37    0.07 
  -2  -1  -1   42.48    1.79 
  -1  -1  -1  102.51    4.24 
   4  -1  -1    0.37    0.05 
   5  -1  -1   21.56    0.74 
   6  -1  -1   14.65    0.50 
   7  -1  -1    7.75    0.29 
   8  -1  -1    4.48    0.17 
  -8   0  -1    1.12    0.08 
  -7   0  -1   22.13    0.75 
  -6   0  -1   39.37    0.78 
  -5   0  -1    6.02    0.17 
  -4   0  -1  249.97    5.96 
  -2   0  -1  499.96   18.13 
   0   0  -1    0.01    0.01 
   1   0  -1    9.93    0.46 
   5   0  -1    6.02    0.16 
   6   0  -1   39.46    1.33 
   7   0  -1   21.18    0.73 
   8   0  -1    0.98    0.07 
  -8   1  -1    4.63    0.19 
  -7   1  -1    7.86    0.17 
  -6   1  -1   13.47    0.30 
  -5   1  -1   21.89    0.53 
  -4   1  -1    0.41    0.08 
   0   1  -1  140.26    5.27 
   1   1  -1  111.71    4.59 
   2   1  -1   47.10    1.80 
   4   1  -1    0.42    0.06 
   5   1  -1   21.94    0.52 
   6   1  -1   14.33    0.50 
   7   1  -1    7.75    0.29 
   8   1  -1    4.38    0.18 
  -8   2  -1    0.18    0.04 
  -7   2  -1    0.73    0.06 
  -6   2  -1    1.79    0.09 
  -5   2  -1    4.02    0.19 
  -4   2  -1   11.22    0.40 
   0   2  -1   12.99    0.63 
   1   2  -1   46.58    1.87 
   2   2  -1   10.56    0.72 
   3   2  -1   22.58    1.25 
   4   2  -1   11.03    0.38 
   6   2  -1    1.99    0.07 
   7   2  -1    1.06    0.08 
   8   2  -1    0.20    0.04 
  -8   3  -1    0.14    0.04 
  -7   3  -1    0.11    0.03 
  -6   3  -1    0.16    0.05 
  -5   3  -1    0.58    0.06 
  -4   3  -1    5.22    0.24 
   0   3  -1   14.65    0.79 
   1   3  -1    9.27    0.67 
   2   3  -1    2.05    0.41 
   3   3  -1    8.49    0.85 
   4   3  -1    5.44    0.21 
   5   3  -1    0.64    0.05 
   6   3  -1    0.21    0.03 
   7   3  -1    0.10    0.05 
   8   3  -1    0.14    0.05 
  -7   4  -1    1.76    0.08 
  -6   4  -1    3.05    0.15 
  -5   4  -1    0.32    0.06 
  -4   4  -1    1.14    0.21 
  -1   4  -1   48.45    2.09 
   0   4  -1   54.77    2.32 
   1   4  -1   44.29    2.14 
   2   4  -1   14.30    1.16 
   4   4  -1    1.01    0.07 
   5   4  -1    0.33    0.05 
   6   4  -1    3.11    0.13 
  -7   5  -1    0.77    0.06 
  -5   5  -1    4.48    0.20 
  -1   5  -1   10.15    0.96 
   0   5  -1    0.02    0.26 
   1   5  -1    8.90    1.02 
   3   5  -1    0.46    0.08 
   4   5  -1    4.63    0.19 
   5   5  -1    4.42    0.18 
   6   5  -1    1.38    0.08 
  -7   6  -1    0.15    0.03 
  -6   6  -1    1.28    0.10 
  -5   6  -1    0.58    0.09 
   3   6  -1    1.52    0.13 
   4   6  -1    5.52    0.22 
   5   6  -1    0.58    0.06 
   6   6  -1    1.23    0.07 
  -6   7  -1    7.54    0.29 
  -5   7  -1   13.14    0.47 
   3   7  -1    6.58    0.26 
   4   7  -1   14.43    0.51 
   5   7  -1   13.28    0.46 
  -5   8  -1    1.02    0.10 
   3   8  -1   22.70    0.80 
   4   8  -1   11.60    0.42 
   0 -11   0    0.03    0.02 
  -3 -10   0    0.11    0.03 
  -2 -10   0    0.12    0.03 
  -1 -10   0    0.02    0.03 
   0 -10   0    2.41    0.11 
   1 -10   0    0.05    0.03 
   2 -10   0    0.14    0.04 
   3 -10   0    0.17    0.06 
  -4  -9   0    2.12    0.10 
  -3  -9   0    2.40    0.11 
  -2  -9   0    5.52    0.24 
  -1  -9   0    0.01    0.03 
   0  -9   0    0.14    0.04 
   1  -9   0    0.05    0.03 
   2  -9   0    5.12    0.21 
   3  -9   0    2.38    0.12 
  -5  -8   0   11.08    0.28 
  -4  -8   0    1.80    0.07 
  -3  -8   0   10.26    0.38 
  -2  -8   0   14.96    0.53 
  -1  -8   0    1.84    0.11 
   0  -8   0   73.29    2.46 
   1  -8   0    1.50    0.10 
   2  -8   0   14.97    0.53 
   3  -8   0   10.54    0.38 
   4  -8   0    1.55    0.11 
  -6  -7   0    1.02    0.05 
  -5  -7   0    2.06    0.08 
  -4  -7   0   34.44    0.82 
  -3  -7   0   25.77    0.52 
  -2  -7   0   46.35    0.90 
  -1  -7   0   22.76    0.57 
   0  -7   0   -0.03    0.04 
   1  -7   0   23.72    0.80 
   2  -7   0   44.19    1.55 
   3  -7   0   25.83    0.90 
   4  -7   0   33.35    1.15 
  -7  -6   0    0.58    0.05 
  -6  -6   0   12.41    0.31 
  -5  -6   0    4.61    0.11 
  -4  -6   0    2.28    0.06 
  -3  -6   0   24.74    0.43 
  -2  -6   0   15.61    0.28 
  -1  -6   0   11.19    0.29 
   0  -6   0   32.46    1.10 
   1  -6   0   11.05    0.40 
   2  -6   0   16.26    0.39 
   3  -6   0   25.37    0.60 
   4  -6   0    2.33    0.13 
  -7  -5   0    1.42    0.08 
  -6  -5   0    0.67    0.05 
  -5  -5   0    6.27    0.14 
  -4  -5   0    0.98    0.04 
  -3  -5   0    2.70    0.07 
  -2  -5   0    0.25    0.03 
  -1  -5   0   15.19    0.53 
   2  -5   0    0.38    0.04 
   3  -5   0    2.64    0.07 
   4  -5   0    0.98    0.05 
   5  -5   0    6.08    0.17 
  -8  -4   0    1.80    0.08 
  -7  -4   0    1.81    0.07 
  -6  -4   0    1.66    0.06 
  -5  -4   0    6.77    0.15 
  -4  -4   0    2.01    0.06 
  -3  -4   0    4.81    0.10 
  -2  -4   0   10.19    0.83 
   3  -4   0    4.52    0.13 
   4  -4   0    2.17    0.06 
   5  -4   0    6.45    0.24 
   6  -4   0    1.51    0.08 
   7  -4   0    1.95    0.07 
  -8  -3   0    0.04    0.03 
  -7  -3   0    0.57    0.05 
  -6  -3   0    0.05    0.03 
  -5  -3   0    0.35    0.04 
  -4  -3   0    1.21    0.05 
  -3  -3   0    7.62    0.84 
  -2  -3   0    2.31    0.38 
  -1  -3   0   19.10    0.94 
   4  -3   0    1.17    0.05 
   5  -3   0    0.26    0.05 
   6  -3   0    0.04    0.03 
   7  -3   0    0.52    0.05 
   8  -3   0    0.09    0.02 
  -8  -2   0    0.11    0.03 
  -7  -2   0    1.47    0.07 
  -6  -2   0    0.57    0.06 
  -5  -2   0    2.11    0.12 
  -4  -2   0    4.18    0.13 
  -3  -2   0    0.96    0.40 
  -2  -2   0    3.37    0.39 
  -1  -2   0    9.19    0.52 
   4  -2   0    4.03    0.11 
   6  -2   0    0.64    0.06 
   7  -2   0    1.51    0.08 
   8  -2   0    0.09    0.03 
  -8  -1   0    1.01    0.07 
  -7  -1   0    6.09    0.25 
  -6  -1   0    2.64    0.08 
  -5  -1   0   24.36    0.49 
  -4  -1   0   77.99    2.28 
  -2  -1   0  224.26    9.66 
  -1  -1   0  127.98    4.98 
   4  -1   0   85.07    2.75 
   5  -1   0   25.49    0.84 
   6  -1   0    2.73    0.12 
   7  -1   0    6.09    0.23 
   8  -1   0    1.01    0.06 
  -8   0   0   21.59    0.74 
  -7   0   0    0.03    0.03 
  -6   0   0   55.64    1.09 
  -5   0   0    0.07    0.03 
  -4   0   0    2.04    0.13 
  -2   0   0 1000.00   34.99 
  -1   0   0    0.02    0.04 
   5   0   0    0.00    0.02 
   6   0   0   55.97    1.87 
   7   0   0    0.04    0.03 
   8   0   0   21.20    0.73 
  -8   1   0    0.96    0.08 
  -7   1   0    5.68    0.17 
  -6   1   0    2.59    0.09 
  -5   1   0   23.74    0.60 
  -4   1   0   89.68    2.77 
   0   1   0    0.03    0.02 
   1   1   0  140.24    5.26 
   2   1   0  304.31   10.40 
   4   1   0   84.29    2.75 
   5   1   0   25.37    0.59 
   6   1   0    2.56    0.09 
   7   1   0    6.03    0.23 
   8   1   0    1.08    0.07 
  -8   2   0    0.10    0.02 
  -7   2   0    1.32    0.07 
  -6   2   0    0.57    0.09 
  -5   2   0    2.14    0.15 
  -4   2   0    4.24    0.18 
   0   2   0  162.85    6.14 
   1   2   0    8.64    0.54 
   2   2   0    3.35    0.37 
   4   2   0    3.98    0.16 
   5   2   0    2.03    0.12 
   6   2   0    0.56    0.05 
   7   2   0    1.51    0.10 
   8   2   0    0.09    0.04 
  -8   3   0    0.02    0.02 
  -7   3   0    0.52    0.06 
  -6   3   0    0.01    0.05 
  -5   3   0    0.23    0.05 
   0   3   0    0.00    0.08 
   1   3   0   17.57    0.97 
   2   3   0    1.97    0.38 
   3   3   0    7.13    0.77 
   4   3   0    1.26    0.07 
   5   3   0    0.29    0.05 
   6   3   0    0.02    0.03 
   7   3   0    0.70    0.09 
   8   3   0    0.09    0.05 
  -8   4   0    1.71    0.06 
  -7   4   0    1.88    0.08 
  -6   4   0    1.47    0.11 
  -5   4   0    6.64    0.27 
  -1   4   0    0.50    0.26 
   1   4   0    0.43    0.31 
   2   4   0    8.66    0.86 
   4   4   0    1.86    0.10 
   5   4   0    6.59    0.25 
   6   4   0    1.55    0.08 
  -7   5   0    1.16    0.06 
  -6   5   0    0.80    0.15 
  -5   5   0    6.28    0.25 
  -2   5   0    0.31    0.47 
  -1   5   0   15.59    1.13 
   0   5   0    0.02    0.26 
   1   5   0   14.07    1.19 
   2   5   0    0.19    0.47 
   3   5   0    2.65    0.15 
   4   5   0    0.99    0.07 
   5   5   0    5.91    0.23 
   6   5   0    0.59    0.06 
  -7   6   0    0.45    0.05 
  -6   6   0   11.51    0.44 
  -5   6   0    4.76    0.21 
   4   6   0    2.21    0.11 
   5   6   0    4.82    0.19 
   6   6   0   12.34    0.43 
  -6   7   0    1.06    0.09 
  -5   7   0    2.12    0.14 
   3   7   0   27.24    0.92 
   4   7   0   33.07    1.15 
   5   7   0    2.02    0.10 
  -5   8   0   10.96    0.41 
   3   8   0   10.26    0.40 
   4   8   0    1.73    0.10 
   0 -11   1    2.78    0.12 
  -3 -10   1    0.24    0.04 
  -2 -10   1    0.15    0.03 
  -1 -10   1    0.71    0.06 
   0 -10   1    0.56    0.06 
   1 -10   1    0.64    0.06 
   2 -10   1    0.21    0.04 
   3 -10   1    0.37    0.06 
  -4  -9   1    0.05    0.03 
  -3  -9   1    0.32    0.06 
  -2  -9   1    1.52    0.10 
  -1  -9   1    1.10    0.08 
   0  -9   1    2.49    0.12 
   1  -9   1    1.22    0.08 
   2  -9   1    1.51    0.09 
   3  -9   1    0.32    0.06 
  -5  -8   1    0.83    0.05 
  -4  -8   1   12.03    0.30 
  -3  -8   1   23.08    0.56 
  -2  -8   1   13.34    0.34 
  -1  -8   1   22.49    0.80 
   0  -8   1    3.55    0.16 
   1  -8   1   23.05    0.80 
   2  -8   1   13.51    0.48 
   3  -8   1   22.30    0.79 
   4  -8   1   11.96    0.43 
  -6  -7   1    7.76    0.21 
  -5  -7   1   13.03    0.33 
  -4  -7   1   14.92    0.37 
  -3  -7   1    6.66    0.19 
  -2  -7   1   14.28    0.36 
  -1  -7   1   16.34    0.41 
   0  -7   1   18.83    0.65 
   1  -7   1   17.12    0.58 
   2  -7   1   14.21    0.36 
   3  -7   1    6.35    0.26 
   4  -7   1   14.42    0.51 
  -6  -6   1    1.30    0.06 
  -5  -6   1    0.61    0.04 
  -4  -6   1    5.55    0.13 
  -3  -6   1    1.46    0.06 
  -2  -6   1    3.44    0.11 
  -1  -6   1   21.14    0.52 
   0  -6   1    0.59    0.07 
   1  -6   1   21.84    0.52 
   2  -6   1    3.37    0.10 
   3  -6   1    1.68    0.07 
   4  -6   1    5.45    0.12 
   5  -6   1    0.56    0.05 
  -7  -5   1    0.85    0.07 
  -6  -5   1    1.45    0.07 
  -5  -5   1    4.63    0.11 
  -4  -5   1    4.95    0.12 
  -3  -5   1    0.50    0.04 
  -2  -5   1    0.38    0.04 
  -1  -5   1    9.46    0.34 
   2  -5   1    0.39    0.04 
   3  -5   1    0.47    0.04 
   4  -5   1    4.79    0.11 
   5  -5   1    4.19    0.17 
   7  -5   1    0.85    0.05 
  -7  -4   1    2.04    0.10 
  -6  -4   1    2.93    0.08 
  -5  -4   1    0.32    0.03 
  -4  -4   1    1.09    0.05 
  -3  -4   1   19.25    0.33 
  -2  -4   1   17.37    1.13 
   3  -4   1   18.60    0.38 
   4  -4   1    0.97    0.04 
   5  -4   1    0.38    0.04 
   6  -4   1    3.04    0.13 
   7  -4   1    2.00    0.09 
  -8  -3   1    0.11    0.03 
  -7  -3   1    0.08    0.03 
  -6  -3   1    0.19    0.03 
  -5  -3   1    0.59    0.05 
  -4  -3   1    5.99    0.16 
  -3  -3   1    8.51    0.91 
  -1  -3   1   10.32    0.64 
   4  -3   1    5.70    0.13 
   5  -3   1    0.53    0.04 
   6  -3   1    0.17    0.03 
   7  -3   1    0.11    0.03 
   8  -3   1    0.10    0.02 
  -8  -2   1    0.27    0.05 
  -7  -2   1    1.05    0.06 
  -6  -2   1    1.94    0.08 
  -5  -2   1    4.15    0.12 
  -4  -2   1   10.70    0.28 
  -3  -2   1   19.28    1.26 
  -2  -2   1   10.78    0.73 
  -1  -2   1   48.04    1.84 
   4  -2   1   10.70    0.27 
   5  -2   1    4.07    0.16 
   6  -2   1    1.97    0.10 
   7  -2   1    0.87    0.07 
   8  -2   1    0.22    0.04 
  -8  -1   1    4.66    0.18 
  -7  -1   1    7.92    0.21 
  -6  -1   1   14.51    0.30 
  -5  -1   1   21.24    0.43 
  -4  -1   1    0.51    0.06 
  -2  -1   1   39.40    1.80 
  -1  -1   1  127.32    4.76 
   4  -1   1    0.48    0.06 
   5  -1   1   22.52    0.74 
   6  -1   1   14.26    0.50 
   8  -1   1    4.58    0.17 
  -8   0   1    1.17    0.08 
  -7   0   1   20.89    0.52 
  -6   0   1   38.83    0.78 
  -5   0   1    5.73    0.14 
  -4   0   1  229.43    5.95 
  -2   0   1  496.16   18.23 
  -1   0   1    9.25    0.46 
   5   0   1    6.34    0.16 
   6   0   1   40.97    1.33 
   7   0   1   21.25    0.73 
   8   0   1    1.07    0.07 
  -8   1   1    4.44    0.18 
  -7   1   1    7.49    0.21 
  -6   1   1   13.37    0.37 
  -5   1   1   20.48    0.75 
  -4   1   1    0.51    0.07 
  -3   1   1   10.44    0.78 
   0   1   1  136.84    4.91 
   1   1   1  129.55    4.55 
   4   1   1    0.57    0.05 
   5   1   1   22.18    0.52 
   6   1   1   14.74    0.35 
   7   1   1    7.59    0.29 
   8   1   1    4.58    0.18 
  -8   2   1    0.20    0.02 
  -7   2   1    0.84    0.07 
  -6   2   1    1.86    0.09 
  -5   2   1    4.33    0.21 
  -4   2   1   10.56    0.40 
   0   2   1   12.37    0.58 
   1   2   1   42.62    1.79 
   2   2   1   12.27    0.71 
   4   2   1   10.87    0.38 
   5   2   1    4.01    0.18 
   6   2   1    2.00    0.07 
   7   2   1    0.90    0.08 
   8   2   1    0.25    0.04 
  -8   3   1    0.14    0.02 
  -7   3   1    0.08    0.03 
  -6   3   1    0.12    0.05 
  -5   3   1    0.60    0.09 
  -4   3   1    5.70    0.24 
   0   3   1   13.80    0.73 
   1   3   1    8.77    0.61 
   2   3   1    2.00    0.43 
   3   3   1    8.79    0.82 
   4   3   1    5.58    0.21 
   5   3   1    0.54    0.06 
   6   3   1    0.18    0.03 
   7   3   1    0.15    0.06 
   8   3   1    0.25    0.07 
  -7   4   1    1.83    0.08 
  -6   4   1    2.86    0.15 
  -5   4   1    0.29    0.06 
   0   4   1   52.33    2.23 
   2   4   1   15.64    1.10 
   3   4   1   19.54    1.46 
   4   4   1    0.87    0.07 
   5   4   1    0.36    0.05 
   6   4   1    3.00    0.13 
  -7   5   1    0.91    0.06 
  -6   5   1    1.32    0.16 
  -5   5   1    4.49    0.20 
  -2   5   1    0.14    0.37 
  -1   5   1   10.23    0.89 
   0   5   1    0.09    0.23 
   1   5   1    8.41    0.93 
   2   5   1    0.26    0.45 
   4   5   1    4.68    0.19 
   5   5   1    4.28    0.18 
   6   5   1    1.29    0.08 
  -7   6   1    0.18    0.04 
  -6   6   1    1.16    0.10 
  -5   6   1    0.62    0.11 
   4   6   1    5.48    0.22 
   5   6   1    0.59    0.06 
   6   6   1    1.25    0.07 
  -6   7   1    7.27    0.21 
  -5   7   1   13.23    0.48 
   4   7   1   14.06    0.51 
   5   7   1   13.02    0.46 
   6   7   1    7.82    0.27 
   4   8   1   11.57    0.42 
   5   8   1    0.86    0.06 
  -3 -10   2    0.76    0.05 
  -2 -10   2    0.02    0.02 
  -1 -10   2    1.61    0.08 
   0 -10   2    1.09    0.07 
   1 -10   2    1.67    0.09 
   3 -10   2    0.85    0.07 
  -4  -9   2    0.40    0.05 
  -3  -9   2    0.56    0.06 
  -2  -9   2    3.21    0.14 
  -1  -9   2    1.88    0.10 
   0  -9   2    0.85    0.07 
   1  -9   2    1.93    0.10 
   2  -9   2    3.06    0.14 
   3  -9   2    0.67    0.06 
  -5  -8   2   12.57    0.31 
  -4  -8   2    7.07    0.19 
  -3  -8   2   14.55    0.36 
  -2  -8   2    9.15    0.25 
  -1  -8   2   15.78    0.54 
   0  -8   2    0.82    0.08 
   1  -8   2   15.13    0.54 
   2  -8   2    8.82    0.34 
   3  -8   2   13.74    0.51 
   4  -8   2    7.44    0.27 
  -6  -7   2    2.26    0.10 
  -5  -7   2    8.07    0.21 
  -4  -7   2    1.16    0.06 
  -3  -7   2   15.53    0.39 
  -2  -7   2    6.15    0.17 
  -1  -7   2   28.62    0.69 
   0  -7   2   21.14    0.72 
   1  -7   2   28.85    0.97 
   2  -7   2    6.61    0.17 
   3  -7   2   15.77    0.39 
   4  -7   2    1.16    0.09 
  -7  -6   2    1.04    0.07 
  -6  -6   2    0.98    0.06 
  -5  -6   2    0.13    0.03 
  -4  -6   2    0.23    0.03 
  -3  -6   2    1.56    0.07 
  -2  -6   2    7.22    0.20 
  -1  -6   2    5.46    0.15 
   0  -6   2   13.48    0.47 
   1  -6   2    5.69    0.15 
   2  -6   2    7.53    0.19 
   3  -6   2    1.47    0.07 
   4  -6   2    0.20    0.02 
   5  -6   2    0.19    0.03 
  -7  -5   2    1.51    0.08 
  -6  -5   2    0.75    0.08 
  -5  -5   2    2.79    0.08 
  -4  -5   2    1.83    0.06 
  -3  -5   2    6.73    0.13 
  -2  -5   2   11.49    0.24 
  -1  -5   2   18.99    0.45 
   0  -5   2    0.18    0.06 
   1  -5   2   19.34    0.64 
   2  -5   2   11.94    0.29 
   3  -5   2    6.93    0.15 
   4  -5   2    1.93    0.07 
   5  -5   2    2.68    0.08 
   6  -5   2    0.68    0.06 
   7  -5   2    1.50    0.07 
  -7  -4   2    0.81    0.07 
  -6  -4   2    1.85    0.08 
  -5  -4   2    1.33    0.06 
  -4  -4   2   15.49    0.31 
  -3  -4   2   17.27    0.31 
  -2  -4   2   20.07    1.28 
   3  -4   2   17.40    0.35 
   4  -4   2   15.56    0.31 
   5  -4   2    1.30    0.05 
   6  -4   2    1.81    0.09 
   7  -4   2    0.69    0.05 
  -8  -3   2    0.45    0.05 
  -7  -3   2    1.55    0.07 
  -6  -3   2    0.17    0.03 
  -5  -3   2    8.66    0.23 
  -4  -3   2    6.72    0.15 
  -3  -3   2   31.35    1.83 
   4  -3   2    6.46    0.14 
   5  -3   2    8.10    0.21 
   6  -3   2    0.27    0.05 
   7  -3   2    1.51    0.08 
   8  -3   2    0.41    0.04 
  -8  -2   2    0.44    0.05 
  -7  -2   2    0.71    0.09 
  -6  -2   2    1.57    0.08 
  -5  -2   2    0.15    0.03 
  -4  -2   2    5.59    0.13 
  -3  -2   2    7.12    0.78 
  -1  -2   2   24.29    1.09 
   4  -2   2    5.70    0.15 
   5  -2   2    0.09    0.02 
   6  -2   2    1.71    0.09 
   8  -2   2    0.39    0.04 
  -8  -1   2    2.09    0.11 
  -7  -1   2    0.28    0.05 
  -6  -1   2    9.17    0.20 
  -5  -1   2    7.99    0.18 
  -4  -1   2    3.86    0.13 
  -3  -1   2   65.94    2.97 
  -2  -1   2   10.04    0.68 
  -1  -1   2  194.97    6.84 
   4  -1   2    4.73    0.17 
   5  -1   2    8.51    0.21 
   6  -1   2    9.86    0.34 
   7  -1   2    0.36    0.06 
   8  -1   2    2.28    0.10 
  -8   0   2    4.76    0.19 
  -7   0   2    4.12    0.13 
  -6   0   2    0.12    0.03 
  -5   0   2   24.45    0.64 
  -4   0   2   41.43    0.98 
  -3   0   2   23.52    1.34 
  -2   0   2  197.60    7.76 
  -1   0   2   20.93    0.95 
   4   0   2   47.05    1.48 
   5   0   2   27.55    0.63 
   6   0   2    0.03    0.03 
   7   0   2    4.44    0.18 
   8   0   2    4.65    0.18 
  -8   1   2    2.25    0.11 
  -7   1   2    0.42    0.05 
  -6   1   2    8.91    0.25 
  -5   1   2    7.55    0.23 
  -4   1   2    4.14    0.19 
  -3   1   2   73.85    2.94 
  -2   1   2   11.38    0.64 
   0   1   2   47.55    1.74 
   4   1   2    4.30    0.16 
   5   1   2    8.70    0.21 
   6   1   2    9.58    0.24 
   8   1   2    2.06    0.10 
  -8   2   2    0.41    0.04 
  -7   2   2    0.83    0.11 
  -6   2   2    1.54    0.08 
  -4   2   2    5.46    0.24 
  -3   2   2    8.12    0.72 
   1   2   2   23.51    1.01 
   2   2   2   54.13    2.00 
   4   2   2    5.83    0.21 
   5   2   2    0.10    0.03 
   6   2   2    1.60    0.07 
   7   2   2    0.73    0.08 
   8   2   2    0.60    0.07 
  -8   3   2    0.41    0.04 
  -7   3   2    1.31    0.07 
  -6   3   2    0.16    0.04 
  -5   3   2    8.09    0.32 
  -4   3   2    6.41    0.27 
   0   3   2   13.04    0.67 
   1   3   2    6.36    0.49 
   2   3   2    7.85    0.61 
   4   3   2    6.49    0.24 
   5   3   2    8.31    0.30 
   6   3   2    0.08    0.06 
   7   3   2    1.38    0.06 
  -7   4   2    0.63    0.06 
  -6   4   2    1.61    0.12 
  -5   4   2    1.26    0.12 
  -1   4   2   17.07    0.93 
   0   4   2   35.66    1.62 
   1   4   2   14.20    0.95 
   2   4   2   20.11    1.21 
   3   4   2   18.47    1.37 
   4   4   2   14.64    0.53 
   5   4   2    1.27    0.08 
   6   4   2    1.81    0.09 
   7   4   2    0.70    0.05 
  -7   5   2    1.61    0.07 
  -6   5   2    0.76    0.10 
  -5   5   2    2.58    0.16 
  -2   5   2   10.56    1.06 
  -1   5   2   19.24    1.21 
   0   5   2    0.13    0.24 
   1   5   2   16.00    1.23 
   2   5   2   11.12    1.15 
   4   5   2    1.73    0.10 
   5   5   2    2.68    0.12 
   6   5   2    0.56    0.07 
   7   5   2    1.43    0.07 
  -7   6   2    0.92    0.07 
  -6   6   2    1.04    0.07 
  -5   6   2    0.14    0.07 
   4   6   2    0.35    0.06 
   5   6   2    0.11    0.03 
   6   6   2    1.09    0.06 
  -6   7   2    1.89    0.12 
  -5   7   2    7.41    0.32 
   4   7   2    1.06    0.08 
   5   7   2    7.75    0.29 
   6   7   2    2.30    0.09 
   4   8   2    6.91    0.26 
   5   8   2   12.36    0.43 
   4   9   2    0.34    0.05 
  -3 -10   3    1.09    0.08 
  -2 -10   3    0.09    0.03 
  -1 -10   3    1.33    0.07 
   0 -10   3    0.48    0.05 
   1 -10   3    1.31    0.07 
   3 -10   3    0.93    0.08 
  -4  -9   3    1.62    0.08 
  -3  -9   3    0.28    0.05 
  -2  -9   3    2.90    0.13 
   0  -9   3   11.98    0.43 
   1  -9   3    0.07    0.04 
   2  -9   3    3.18    0.14 
   3  -9   3    0.32    0.06 
  -5  -8   3    1.95    0.10 
  -4  -8   3    1.27    0.06 
  -3  -8   3    4.31    0.13 
  -1  -8   3   35.41    1.23 
   0  -8   3   13.29    0.47 
   1  -8   3   37.09    1.24 
   3  -8   3    4.85    0.18 
   4  -8   3    1.45    0.09 
  -6  -7   3    2.60    0.11 
  -5  -7   3    4.50    0.13 
  -4  -7   3    0.01    0.03 
  -3  -7   3   18.86    0.47 
  -2  -7   3    2.60    0.07 
  -1  -7   3    6.64    0.18 
   0  -7   3    5.54    0.22 
   1  -7   3    6.52    0.25 
   2  -7   3    2.62    0.09 
   3  -7   3   19.89    0.47 
   4  -7   3    0.01    0.03 
  -7  -6   3    0.40    0.06 
  -6  -6   3    0.12    0.04 
  -5  -6   3    5.24    0.22 
  -4  -6   3    0.15    0.03 
  -3  -6   3    3.29    0.11 
  -2  -6   3    4.16    0.20 
  -1  -6   3    6.44    0.18 
   0  -6   3   16.03    0.39 
   1  -6   3    6.54    0.14 
   2  -6   3    3.55    0.10 
   3  -6   3    3.36    0.08 
   4  -6   3    0.15    0.02 
   5  -6   3    5.24    0.14 
   6  -6   3    0.13    0.04 
  -7  -5   3    0.87    0.06 
  -6  -5   3    2.47    0.14 
  -5  -5   3    1.02    0.05 
  -4  -5   3    6.71    0.15 
  -3  -5   3    4.83    0.12 
  -2  -5   3    1.41    0.07 
  -1  -5   3   28.10    0.67 
   0  -5   3   10.78    0.27 
   1  -5   3   28.62    0.94 
   2  -5   3    1.82    0.05 
   3  -5   3    4.86    0.11 
   4  -5   3    6.79    0.15 
   5  -5   3    1.03    0.05 
   6  -5   3    2.44    0.10 
   7  -5   3    0.79    0.05 
  -7  -4   3    0.43    0.06 
  -6  -4   3    0.33    0.04 
  -5  -4   3   15.11    0.38 
  -4  -4   3   12.05    0.31 
  -3  -4   3   42.66    0.83 
  -2  -4   3   35.36    1.89 
   3  -4   3   41.37    0.83 
   4  -4   3   12.29    0.31 
   5  -4   3   14.84    0.37 
   6  -4   3    0.34    0.05 
   7  -4   3    0.45    0.04 
  -8  -3   3    2.42    0.10 
  -7  -3   3    3.21    0.14 
  -6  -3   3    6.64    0.26 
  -5  -3   3    1.84    0.08 
  -4  -3   3    1.47    0.07 
  -3  -3   3    1.62    0.10 
   3  -3   3    1.66    0.06 
   4  -3   3    1.34    0.05 
   5  -3   3    1.85    0.07 
   6  -3   3    6.03    0.23 
   7  -3   3    3.20    0.13 
   8  -3   3    2.41    0.09 
  -8  -2   3    0.29    0.05 
  -7  -2   3    1.00    0.09 
  -6  -2   3    0.84    0.07 
  -5  -2   3    0.43    0.04 
  -4  -2   3    5.08    0.12 
  -3  -2   3    2.53    0.58 
  -2  -2   3    9.89    0.71 
  -1  -2   3   71.39    2.75 
   4  -2   3    5.28    0.14 
   5  -2   3    0.47    0.04 
   6  -2   3    0.84    0.07 
   7  -2   3    0.86    0.06 
   8  -2   3    0.23    0.04 
  -8  -1   3    1.76    0.09 
  -7  -1   3    1.00    0.10 
  -6  -1   3    7.15    0.19 
  -5  -1   3    0.68    0.08 
  -4  -1   3    7.44    0.21 
  -3  -1   3    4.50    0.62 
  -2  -1   3   14.94    0.89 
  -1  -1   3    1.84    0.23 
   4  -1   3    7.87    0.28 
   5  -1   3    0.87    0.08 
   6  -1   3    6.70    0.25 
   7  -1   3    0.93    0.08 
   8  -1   3    1.54    0.08 
  -8   0   3    8.15    0.29 
  -7   0   3    0.25    0.05 
  -6   0   3   28.21    0.67 
  -5   0   3    0.02    0.03 
  -4   0   3   14.99    0.41 
  -3   0   3   10.70    0.87 
  -2   0   3    2.34    0.32 
  -1   0   3    1.18    0.17 
   4   0   3   16.70    0.40 
   5   0   3    0.04    0.02 
   6   0   3   27.38    0.66 
   7   0   3    0.23    0.06 
   8   0   3    7.93    0.28 
  -8   1   3    1.83    0.09 
  -7   1   3    0.95    0.09 
  -6   1   3    6.32    0.19 
  -5   1   3    0.71    0.11 
  -4   1   3    7.42    0.30 
  -3   1   3    3.81    0.55 
  -2   1   3   16.93    0.86 
  -1   1   3    1.99    0.18 
   4   1   3    7.58    0.27 
   5   1   3    0.81    0.08 
   6   1   3    6.75    0.18 
   7   1   3    0.98    0.08 
   8   1   3    1.70    0.09 
  -8   2   3    0.24    0.03 
  -7   2   3    0.90    0.06 
  -6   2   3    0.77    0.11 
  -5   2   3    0.36    0.06 
  -4   2   3    5.01    0.23 
  -3   2   3    2.95    0.53 
   0   2   3   16.09    0.66 
   1   2   3   78.77    2.61 
   4   2   3    5.29    0.19 
   5   2   3    0.51    0.04 
   6   2   3    0.91    0.05 
   7   2   3    0.90    0.05 
   8   2   3    0.28    0.04 
  -8   3   3    2.54    0.08 
  -7   3   3    3.07    0.10 
  -6   3   3    5.80    0.19 
  -5   3   3    1.73    0.13 
  -4   3   3    1.16    0.14 
  -3   3   3    1.80    0.56 
   0   3   3   62.98    2.40 
   1   3   3   30.22    1.34 
   2   3   3   21.84    1.06 
   4   3   3    1.42    0.08 
   5   3   3    1.80    0.09 
   6   3   3    6.31    0.23 
   7   3   3    3.09    0.12 
  -7   4   3    0.46    0.05 
  -6   4   3    0.25    0.04 
  -5   4   3   14.32    0.54 
  -1   4   3    2.44    0.34 
   0   4   3    5.62    0.49 
   1   4   3    2.26    0.38 
   2   4   3   38.74    1.74 
   4   4   3   12.16    0.43 
   5   4   3   14.40    0.52 
   6   4   3    0.37    0.05 
   7   4   3    0.49    0.05 
  -7   5   3    0.77    0.07 
  -6   5   3    2.28    0.10 
  -5   5   3    0.81    0.12 
  -2   5   3    1.83    0.79 
  -1   5   3   28.56    1.52 
   0   5   3    9.89    0.86 
   1   5   3   23.68    1.50 
   4   5   3    6.50    0.25 
   5   5   3    1.04    0.07 
   6   5   3    2.62    0.11 
   7   5   3    0.82    0.05 
  -7   6   3    0.30    0.07 
  -6   6   3    0.15    0.04 
   4   6   3    0.14    0.04 
   5   6   3    5.47    0.21 
   6   6   3    0.14    0.03 
  -6   7   3    2.16    0.12 
  -5   7   3    4.25    0.22 
   4   7   3    0.04    0.03 
   5   7   3    4.39    0.18 
   6   7   3    2.40    0.10 
   4   8   3    1.24    0.08 
   5   8   3    1.91    0.09 
   4   9   3    1.63    0.09 
  -3 -10   4    0.11    0.03 
  -2 -10   4    0.80    0.06 
  -1 -10   4    0.45    0.05 
   0 -10   4    0.10    0.03 
   1 -10   4    0.36    0.05 
   2 -10   4    1.09    0.06 
   3 -10   4    0.10    0.03 
  -4  -9   4    1.29    0.08 
  -3  -9   4    0.41    0.05 
  -2  -9   4    0.77    0.07 
  -1  -9   4    0.02    0.03 
   1  -9   4    0.00    0.03 
   2  -9   4    0.89    0.07 
   3  -9   4    0.51    0.06 
  -5  -8   4    4.15    0.16 
  -4  -8   4    8.69    0.22 
  -3  -8   4    7.48    0.29 
  -2  -8   4    2.71    0.09 
  -1  -8   4    5.97    0.24 
   0  -8   4    1.03    0.08 
   1  -8   4    6.11    0.24 
   2  -8   4    2.60    0.09 
   3  -8   4    7.82    0.21 
   4  -8   4    8.50    0.31 
  -6  -7   4    0.72    0.06 
  -5  -7   4    0.98    0.06 
  -4  -7   4    5.25    0.15 
  -3  -7   4    5.03    0.15 
  -2  -7   4    5.47    0.12 
  -1  -7   4   11.26    0.23 
   0  -7   4    0.06    0.03 
   1  -7   4   11.48    0.29 
   2  -7   4    5.47    0.15 
   3  -7   4    5.40    0.15 
   4  -7   4    4.95    0.14 
  -6  -6   4    2.35    0.11 
  -5  -6   4    0.10    0.03 
  -4  -6   4    4.39    0.13 
  -3  -6   4    4.15    0.13 
  -2  -6   4    3.06    0.10 
  -1  -6   4    7.60    0.16 
   0  -6   4    2.19    0.07 
   1  -6   4    7.46    0.16 
   2  -6   4    3.09    0.09 
   3  -6   4    4.20    0.10 
   4  -6   4    4.42    0.10 
   5  -6   4    0.10    0.03 
   6  -6   4    2.30    0.09 
  -7  -5   4    0.25    0.05 
  -6  -5   4    1.93    0.11 
  -5  -5   4    8.73    0.34 
  -4  -5   4    6.55    0.18 
  -3  -5   4   23.55    0.82 
  -2  -5   4    1.09    0.06 
  -1  -5   4    6.85    0.18 
   0  -5   4    5.33    0.12 
   1  -5   4    6.77    0.14 
   2  -5   4    1.21    0.04 
   3  -5   4   23.92    0.81 
   4  -5   4    6.57    0.14 
   5  -5   4    9.13    0.23 
   6  -5   4    1.70    0.08 
   7  -5   4    0.24    0.03 
  -7  -4   4    2.80    0.13 
  -6  -4   4    0.74    0.07 
  -5  -4   4    8.17    0.21 
  -4  -4   4    0.51    0.06 
  -3  -4   4    0.92    0.05 
  -2  -4   4   11.46    0.43 
   2  -4   4   12.36    0.24 
   3  -4   4    0.91    0.04 
   4  -4   4    0.58    0.03 
   5  -4   4    7.78    0.20 
   6  -4   4    0.78    0.04 
   7  -4   4    2.92    0.11 
  -8  -3   4    0.38    0.05 
  -7  -3   4    0.77    0.07 
  -5  -3   4    2.82    0.10 
  -4  -3   4   11.39    0.29 
  -3  -3   4    4.48    0.19 
  -2  -3   4   10.59    0.87 
  -1  -3   4   40.25    1.82 
   3  -3   4    4.31    0.10 
   4  -3   4   11.09    0.23 
   5  -3   4    2.49    0.08 
   6  -3   4    1.32    0.09 
   7  -3   4    0.75    0.06 
   8  -3   4    0.50    0.05 
  -8  -2   4    3.01    0.13 
  -7  -2   4    1.02    0.08 
  -6  -2   4    3.22    0.16 
  -5  -2   4    1.40    0.06 
  -4  -2   4   10.42    0.21 
  -3  -2   4    0.23    0.32 
  -2  -2   4    9.69    0.73 
  -1  -2   4    1.58    0.27 
   4  -2   4   10.08    0.25 
   5  -2   4    1.31    0.06 
   6  -2   4    3.32    0.10 
   7  -2   4    0.94    0.06 
   8  -2   4    2.97    0.12 
  -8  -1   4    0.26    0.05 
  -7  -1   4    1.87    0.11 
  -6  -1   4    0.73    0.06 
  -5  -1   4    1.11    0.06 
  -4  -1   4    8.93    0.23 
  -3  -1   4   15.46    1.11 
  -2  -1   4   19.98    1.07 
  -1  -1   4   38.88    1.51 
   4  -1   4    8.48    0.17 
   5  -1   4    1.12    0.05 
   6  -1   4    0.77    0.07 
   7  -1   4    1.86    0.10 
   8  -1   4    0.29    0.04 
  -8   0   4    1.28    0.08 
  -7   0   4    0.67    0.06 
  -6   0   4    0.06    0.03 
  -5   0   4    0.25    0.05 
  -4   0   4    0.10    0.04 
  -3   0   4   10.79    0.91 
  -2   0   4   24.38    1.20 
  -1   0   4  181.02    6.90 
   4   0   4    0.10    0.02 
   6   0   4    0.00    0.02 
   7   0   4    0.57    0.06 
   8   0   4    1.12    0.07 
  -8   1   4    0.28    0.06 
  -7   1   4    1.87    0.08 
  -6   1   4    0.76    0.06 
  -5   1   4    1.16    0.09 
  -4   1   4    7.82    0.23 
  -3   1   4   14.05    1.04 
  -2   1   4   18.18    0.99 
  -1   1   4   35.79    1.39 
   4   1   4    8.35    0.22 
   5   1   4    1.15    0.05 
   6   1   4    0.80    0.05 
   7   1   4    1.86    0.10 
   8   1   4    0.29    0.05 
  -8   2   4    2.96    0.10 
  -7   2   4    0.89    0.06 
  -6   2   4    3.27    0.17 
  -5   2   4    1.23    0.08 
  -4   2   4    8.84    0.38 
  -3   2   4    0.15    0.27 
  -2   2   4   10.57    0.65 
   4   2   4   10.51    0.36 
   5   2   4    1.36    0.07 
   6   2   4    3.48    0.10 
   7   2   4    0.97    0.05 
   8   2   4    2.84    0.13 
  -8   3   4    0.37    0.04 
  -7   3   4    0.77    0.06 
  -6   3   4    1.41    0.10 
  -5   3   4    2.42    0.11 
  -4   3   4   10.54    0.43 
  -3   3   4    5.14    0.82 
  -2   3   4   11.95    0.74 
  -1   3   4   38.35    1.53 
   1   3   4   40.98    1.55 
   4   3   4   11.15    0.39 
   5   3   4    2.60    0.12 
   6   3   4    1.26    0.10 
   7   3   4    0.74    0.05 
  -7   4   4    2.84    0.10 
  -6   4   4    0.78    0.08 
  -5   4   4    6.82    0.31 
  -1   4   4  104.49    3.86 
   0   4   4    2.96    0.35 
   1   4   4  106.53    3.88 
   5   4   4    7.51    0.28 
   6   4   4    0.75    0.06 
   7   4   4    2.81    0.11 
  -7   5   4    0.26    0.04 
  -6   5   4    1.54    0.09 
   4   5   4    6.28    0.24 
   5   5   4    7.97    0.32 
   6   5   4    1.75    0.08 
   7   5   4    0.21    0.03 
  -6   6   4    2.19    0.13 
  -5   6   4    0.03    0.08 
   4   6   4    4.31    0.18 
   5   6   4    0.07    0.03 
   6   6   4    2.35    0.10 
  -5   7   4    0.77    0.14 
   5   7   4    0.82    0.06 
   6   7   4    0.68    0.05 
   4   8   4    8.36    0.30 
   5   8   4    4.05    0.16 
   4   9   4    1.39    0.08 
  -2 -10   5    0.96    0.06 
  -1 -10   5    0.28    0.04 
   0 -10   5    0.07    0.03 
   2 -10   5    1.11    0.06 
  -3  -9   5    0.57    0.06 
  -2  -9   5    0.07    0.04 
  -1  -9   5    1.07    0.08 
   0  -9   5    0.05    0.03 
   1  -9   5    1.09    0.07 
   2  -9   5    0.13    0.04 
   3  -9   5    0.54    0.06 
  -5  -8   5    0.43    0.05 
  -4  -8   5    3.26    0.10 
  -3  -8   5    0.17    0.02 
  -2  -8   5    5.36    0.22 
  -1  -8   5    0.30    0.06 
   0  -8   5    4.90    0.23 
   1  -8   5    0.24    0.06 
   2  -8   5    5.44    0.15 
   3  -8   5    0.13    0.03 
   4  -8   5    3.31    0.14 
  -6  -7   5    1.98    0.09 
  -5  -7   5    4.07    0.17 
  -4  -7   5    4.40    0.13 
  -3  -7   5    2.13    0.15 
  -2  -7   5    0.06    0.02 
  -1  -7   5    9.42    0.20 
   0  -7   5    0.12    0.02 
   1  -7   5    9.46    0.20 
   2  -7   5    0.03    0.02 
   3  -7   5    2.66    0.10 
   4  -7   5    3.84    0.12 
  -6  -6   5    0.28    0.05 
  -4  -6   5    3.49    0.17 
  -3  -6   5    3.62    0.12 
  -2  -6   5    4.19    0.13 
  -1  -6   5    8.39    0.18 
   0  -6   5    1.37    0.06 
   1  -6   5    8.34    0.17 
   2  -6   5    4.39    0.10 
   3  -6   5    4.06    0.09 
   4  -6   5    3.84    0.09 
   5  -6   5    0.08    0.02 
   6  -6   5    0.20    0.02 
  -7  -5   5    0.13    0.03 
  -6  -5   5    0.00    0.03 
  -5  -5   5    0.53    0.07 
  -4  -5   5    3.27    0.16 
  -3  -5   5    3.51    0.12 
  -2  -5   5   27.74    0.68 
  -1  -5   5    7.74    0.21 
   0  -5   5    4.66    0.11 
   1  -5   5    8.07    0.17 
   2  -5   5   28.77    0.55 
   3  -5   5    3.76    0.09 
   4  -5   5    3.62    0.09 
   5  -5   5    0.39    0.04 
   6  -5   5    0.01    0.02 
  -7  -4   5    0.89    0.07 
  -6  -4   5    3.70    0.17 
  -5  -4   5    5.10    0.22 
  -4  -4   5    1.24    0.09 
  -3  -4   5   25.48    0.89 
  -2  -4   5   22.90    0.81 
   2  -4   5   23.45    0.46 
   3  -4   5   26.32    0.51 
   4  -4   5    1.16    0.04 
   5  -4   5    5.30    0.14 
   6  -4   5    4.00    0.11 
   7  -4   5    0.88    0.05 
  -7  -3   5    3.52    0.15 
  -6  -3   5    4.06    0.18 
  -5  -3   5    6.85    0.26 
  -4  -3   5    1.53    0.08 
  -3  -3   5   31.17    1.04 
  -2  -3   5   57.15    2.58 
   3  -3   5   30.44    0.59 
   4  -3   5    1.31    0.05 
   5  -3   5    6.33    0.17 
   6  -3   5    3.87    0.11 
   7  -3   5    3.52    0.14 
  -8  -2   5    0.39    0.05 
  -7  -2   5    1.38    0.09 
  -6  -2   5    0.97    0.13 
  -5  -2   5    1.87    0.07 
  -4  -2   5    5.65    0.15 
  -3  -2   5    3.75    0.76 
  -2  -2   5    1.81    0.41 
   3  -2   5    3.29    0.08 
   4  -2   5    5.28    0.14 
   5  -2   5    1.76    0.07 
   6  -2   5    1.26    0.08 
   7  -2   5    1.26    0.07 
   8  -2   5    0.37    0.04 
  -8  -1   5    1.42    0.08 
  -7  -1   5    0.21    0.05 
  -6  -1   5    1.47    0.07 
  -5  -1   5    6.54    0.18 
  -4  -1   5    7.52    0.29 
  -3  -1   5   32.96    1.79 
  -2  -1   5   12.36    0.82 
  -1  -1   5   13.71    0.72 
   4  -1   5    7.30    0.15 
   5  -1   5    6.15    0.14 
   6  -1   5    1.30    0.06 
   7  -1   5    0.14    0.03 
   8  -1   5    1.24    0.07 
  -8   0   5    0.20    0.03 
  -7   0   5    8.94    0.23 
  -6   0   5    0.02    0.03 
  -5   0   5   13.05    0.33 
  -4   0   5   10.70    0.29 
  -3   0   5    6.60    0.78 
  -2   0   5   31.33    1.45 
  -1   0   5   24.30    1.03 
   4   0   5   11.42    0.23 
   5   0   5   12.65    0.31 
   6   0   5    0.02    0.02 
   7   0   5    8.65    0.32 
   8   0   5    0.28    0.05 
  -8   1   5    1.48    0.09 
  -7   1   5    0.17    0.03 
  -6   1   5    1.37    0.07 
  -5   1   5    6.11    0.18 
  -4   1   5    6.72    0.21 
  -3   1   5   28.82    1.67 
  -2   1   5   11.36    0.73 
  -1   1   5   14.35    0.59 
   4   1   5    7.07    0.19 
   5   1   5    6.32    0.17 
   6   1   5    1.30    0.06 
   7   1   5    0.22    0.04 
   8   1   5    1.37    0.08 
  -8   2   5    0.32    0.03 
  -7   2   5    1.35    0.06 
  -6   2   5    1.07    0.10 
  -5   2   5    1.74    0.09 
  -4   2   5    4.75    0.17 
  -3   2   5    3.20    0.68 
  -2   2   5    1.65    0.32 
  -1   2   5   56.15    2.04 
   4   2   5    5.66    0.20 
   5   2   5    1.84    0.07 
   6   2   5    1.24    0.07 
   7   2   5    1.34    0.06 
   8   2   5    0.38    0.06 
  -7   3   5    3.46    0.11 
  -6   3   5    3.62    0.13 
  -5   3   5    5.65    0.19 
  -4   3   5    1.20    0.15 
  -3   3   5   28.13    1.78 
  -2   3   5   61.47    2.34 
  -1   3   5   59.83    1.58 
   4   3   5    1.35    0.08 
   5   3   5    6.56    0.24 
   6   3   5    3.83    0.15 
   7   3   5    3.38    0.13 
  -7   4   5    0.85    0.07 
  -6   4   5    4.01    0.19 
  -5   4   5    4.46    0.17 
  -1   4   5   34.50    1.43 
   3   4   5   25.71    0.88 
   4   4   5    1.13    0.08 
   5   4   5    5.18    0.20 
   6   4   5    4.05    0.16 
   7   4   5    0.89    0.05 
  -7   5   5    0.09    0.03 
  -6   5   5    0.00    0.04 
  -5   5   5    0.30    0.08 
   4   5   5    3.31    0.15 
   5   5   5    0.46    0.05 
   6   5   5    0.00    0.02 
   7   5   5    0.08    0.02 
  -6   6   5    0.21    0.05 
  -5   6   5    0.02    0.08 
   4   6   5    3.42    0.17 
   5   6   5    0.07    0.03 
   6   6   5    0.24    0.04 
  -6   7   5    1.79    0.10 
  -5   7   5    3.51    0.20 
   4   7   5    4.20    0.16 
   5   7   5    4.09    0.16 
   6   7   5    1.85    0.08 
   4   8   5    3.29    0.14 
   5   8   5    0.34    0.04 
   4   9   5    0.80    0.07 
  -2 -10   6    0.96    0.06 
  -1 -10   6    1.36    0.07 
   0 -10   6    1.03    0.06 
   1 -10   6    1.58    0.08 
   2 -10   6    1.04    0.06 
  -3  -9   6    1.50    0.08 
  -2  -9   6    2.11    0.10 
  -1  -9   6    0.25    0.04 
   0  -9   6    1.22    0.08 
   2  -9   6    1.94    0.10 
   3  -9   6    1.59    0.08 
  -5  -8   6    2.05    0.09 
  -4  -8   6    1.00    0.04 
  -3  -8   6    2.28    0.06 
  -2  -8   6    1.30    0.12 
  -1  -8   6    0.85    0.08 
   0  -8   6    2.44    0.12 
   1  -8   6    0.95    0.08 
   2  -8   6    1.28    0.06 
   3  -8   6    2.30    0.08 
  -6  -7   6    3.47    0.09 
  -5  -7   6    0.28    0.06 
  -4  -7   6    1.11    0.10 
  -3  -7   6    0.14    0.03 
  -2  -7   6    6.73    0.15 
  -1  -7   6    2.94    0.09 
   0  -7   6   15.40    0.38 
   1  -7   6    2.99    0.07 
   2  -7   6    6.75    0.15 
   3  -7   6    0.15    0.02 
   4  -7   6    1.11    0.04 
  -6  -6   6    0.82    0.07 
  -5  -6   6    0.57    0.07 
  -4  -6   6    5.96    0.25 
  -3  -6   6    0.18    0.04 
  -2  -6   6    3.76    0.12 
  -1  -6   6    0.03    0.02 
   0  -6   6    0.23    0.03 
   1  -6   6    0.04    0.02 
   2  -6   6    3.77    0.09 
   3  -6   6    0.24    0.02 
   4  -6   6    6.14    0.14 
   5  -6   6    0.56    0.04 
   6  -6   6    0.72    0.05 
  -7  -5   6    2.13    0.09 
  -6  -5   6    2.28    0.12 
  -5  -5   6    3.53    0.16 
  -4  -5   6    2.41    0.13 
  -3  -5   6    3.79    0.17 
  -2  -5   6    3.22    0.11 
  -1  -5   6    5.26    0.15 
   0  -5   6    0.07    0.05 
   1  -5   6    5.13    0.11 
   2  -5   6    3.43    0.08 
   3  -5   6    3.84    0.09 
   4  -5   6    2.52    0.07 
   5  -5   6    3.64    0.10 
   6  -5   6    2.30    0.07 
   7  -5   6    2.07    0.08 
  -7  -4   6    0.86    0.07 
  -6  -4   6    7.74    0.30 
  -5  -4   6    1.50    0.10 
  -4  -4   6   26.41    0.93 
  -3  -4   6    6.35    0.26 
  -2  -4   6   23.71    0.85 
  -1  -4   6    1.26    0.10 
   0  -4   6    6.35    0.17 
   1  -4   6    1.36    0.05 
   2  -4   6   24.73    0.49 
   3  -4   6    7.12    0.15 
   4  -4   6   26.87    0.53 
   5  -4   6    1.63    0.06 
   6  -4   6    7.50    0.20 
   7  -4   6    0.94    0.05 
  -7  -3   6    3.66    0.15 
  -6  -3   6    0.06    0.04 
  -5  -3   6   19.88    0.68 
  -4  -3   6    2.04    0.12 
  -3  -3   6   31.39    0.77 
  -2  -3   6    5.54    0.22 
   2  -3   6    5.43    0.12 
   3  -3   6   32.09    0.62 
   4  -3   6    2.10    0.07 
   5  -3   6   18.70    0.47 
   6  -3   6    0.04    0.02 
   7  -3   6    3.54    0.14 
  -7  -2   6    1.35    0.09 
  -6  -2   6    5.02    0.21 
  -5  -2   6    0.72    0.05 
  -4  -2   6   11.13    0.28 
  -3  -2   6    1.84    0.08 
  -2  -2   6    7.16    0.72 
   3  -2   6    1.95    0.06 
   4  -2   6   10.78    0.27 
   5  -2   6    0.62    0.05 
   6  -2   6    4.96    0.14 
   7  -2   6    1.24    0.07 
  -8  -1   6    1.01    0.07 
  -7  -1   6    0.75    0.08 
  -5  -1   6    2.34    0.09 
  -4  -1   6    5.07    0.15 
  -3  -1   6   22.38    0.67 
  -2  -1   6   13.59    0.89 
  -1  -1   6   61.69    2.32 
   3  -1   6   21.36    0.52 
   4  -1   6    5.14    0.11 
   5  -1   6    2.33    0.06 
   6  -1   6    3.62    0.16 
   7  -1   6    0.65    0.06 
   8  -1   6    0.99    0.06 
  -8   0   6    0.11    0.04 
  -7   0   6    4.30    0.12 
  -6   0   6    0.99    0.07 
  -5   0   6    0.01    0.03 
  -4   0   6    0.58    0.06 
  -3   0   6   39.90    1.16 
  -2   0   6    7.96    0.62 
  -1   0   6  163.03    5.94 
   3   0   6   40.50    1.38 
   4   0   6    0.56    0.04 
   5   0   6    0.05    0.02 
   7   0   6    4.25    0.17 
  -8   1   6    0.88    0.11 
  -7   1   6    0.79    0.05 
  -6   1   6    3.84    0.21 
  -5   1   6    2.29    0.10 
  -4   1   6    4.70    0.16 
  -3   1   6   21.64    1.44 
  -2   1   6   13.72    0.80 
  -1   1   6   62.75    2.07 
   3   1   6   22.67    0.74 
   4   1   6    4.98    0.14 
   5   1   6    2.12    0.08 
   6   1   6    4.36    0.18 
   7   1   6    0.68    0.07 
   8   1   6    0.91    0.07 
  -7   2   6    1.42    0.06 
  -6   2   6    5.03    0.15 
  -5   2   6    0.79    0.08 
  -4   2   6   10.09    0.41 
  -3   2   6    1.81    0.72 
  -2   2   6    7.04    0.56 
   3   2   6    1.93    0.10 
   4   2   6   10.88    0.38 
   5   2   6    0.69    0.05 
   6   2   6    4.88    0.14 
   7   2   6    1.26    0.06 
  -7   3   6    3.68    0.15 
  -6   3   6    0.05    0.04 
  -5   3   6   17.86    0.48 
  -4   3   6    1.72    0.16 
  -2   3   6    4.96    0.52 
   3   3   6   30.90    1.07 
   4   3   6    1.88    0.09 
   5   3   6   19.28    0.66 
   6   3   6    0.06    0.03 
   7   3   6    3.60    0.13 
  -7   4   6    0.85    0.06 
  -6   4   6    7.67    0.30 
  -5   4   6    1.28    0.13 
  -4   4   6   23.26    0.93 
   3   4   6    6.17    0.25 
   4   4   6   26.89    0.91 
   5   4   6    1.55    0.08 
   6   4   6    8.01    0.28 
   7   4   6    0.96    0.05 
  -7   5   6    2.01    0.09 
  -6   5   6    2.39    0.13 
  -5   5   6    2.98    0.18 
   4   5   6    2.34    0.11 
   5   5   6    3.53    0.14 
   6   5   6    2.31    0.10 
   7   5   6    2.12    0.09 
  -6   6   6    0.81    0.08 
  -5   6   6    0.60    0.08 
   4   6   6    5.95    0.23 
   5   6   6    0.49    0.05 
   6   6   6    0.83    0.05 
  -6   7   6    3.20    0.14 
  -5   7   6    0.30    0.08 
   4   7   6    1.25    0.08 
   5   7   6    0.33    0.04 
   4   8   6    0.99    0.07 
   5   8   6    1.90    0.08 
   4   9   6    1.08    0.11 
  -1 -10   7    0.52    0.05 
   0 -10   7    1.07    0.06 
   1 -10   7    0.47    0.05 
  -2  -9   7    2.79    0.12 
  -1  -9   7    0.51    0.06 
   0  -9   7    6.02    0.23 
   1  -9   7    0.57    0.06 
   2  -9   7    2.92    0.12 
   3  -9   7    0.97    0.06 
  -3  -8   7    4.39    0.12 
  -2  -8   7    2.87    0.09 
  -1  -8   7    2.64    0.08 
   0  -8   7   10.02    0.37 
   1  -8   7    2.36    0.12 
   2  -8   7    2.80    0.09 
   3  -8   7    4.20    0.12 
  -5  -7   7    5.49    0.14 
  -4  -7   7    3.30    0.15 
  -3  -7   7    0.22    0.03 
  -2  -7   7   12.07    0.47 
  -1  -7   7   14.50    0.36 
   0  -7   7    5.51    0.15 
   1  -7   7   14.59    0.29 
   2  -7   7   11.77    0.45 
   3  -7   7    0.23    0.02 
   4  -7   7    3.21    0.08 
   5  -7   7    5.45    0.20 
  -6  -6   7    1.51    0.08 
  -5  -6   7    1.17    0.09 
  -4  -6   7    1.20    0.09 
  -3  -6   7   10.40    0.28 
  -2  -6   7    7.12    0.20 
  -1  -6   7   10.29    0.21 
   0  -6   7   27.42    0.54 
   1  -6   7    9.88    0.21 
   2  -6   7    7.45    0.15 
   3  -6   7   10.49    0.22 
   4  -6   7    1.22    0.04 
   5  -6   7    1.26    0.05 
  -6  -5   7    2.03    0.11 
  -5  -5   7    1.01    0.09 
  -4  -5   7    0.57    0.08 
  -3  -5   7    0.43    0.07 
  -2  -5   7   15.73    0.40 
  -1  -5   7    1.92    0.07 
   0  -5   7    9.17    0.19 
   1  -5   7    2.13    0.06 
   2  -5   7   16.37    0.32 
   3  -5   7    0.44    0.03 
   4  -5   7    0.66    0.04 
   5  -5   7    1.00    0.05 
   6  -5   7    1.99    0.06 
  -7  -4   7    1.00    0.07 
  -6  -4   7    1.23    0.09 
  -5  -4   7    0.01    0.04 
  -4  -4   7    2.21    0.12 
  -3  -4   7    8.25    0.33 
  -2  -4   7    5.54    0.23 
  -1  -4   7   27.02    0.54 
   0  -4   7   11.18    0.20 
   1  -4   7   27.25    0.53 
   2  -4   7    6.18    0.13 
   3  -4   7    8.80    0.18 
   4  -4   7    2.12    0.07 
   5  -4   7    0.07    0.03 
   6  -4   7    1.19    0.05 
   7  -4   7    0.96    0.05 
  -7  -3   7    1.35    0.08 
  -5  -3   7    2.43    0.13 
  -4  -3   7    2.38    0.13 
  -3  -3   7    5.78    0.16 
  -2  -3   7    8.79    0.33 
   1  -3   7   14.71    0.35 
   2  -3   7    8.86    0.18 
   3  -3   7    6.43    0.13 
   4  -3   7    2.49    0.08 
   5  -3   7    2.63    0.08 
   6  -3   7    0.93    0.05 
   7  -3   7    1.35    0.07 
  -7  -2   7    1.07    0.08 
  -6  -2   7    2.00    0.12 
  -5  -2   7    1.74    0.07 
  -3  -2   7    1.02    0.06 
  -2  -2   7    3.09    0.13 
   2  -2   7    3.10    0.08 
   3  -2   7    1.13    0.04 
   4  -2   7    1.84    0.08 
   5  -2   7    1.85    0.07 
   6  -2   7    1.94    0.07 
   7  -2   7    1.07    0.06 
  -7  -1   7    2.72    0.12 
  -6  -1   7    0.22    0.03 
  -5  -1   7    8.55    0.22 
  -4  -1   7   12.59    0.33 
  -3  -1   7    6.10    0.17 
  -2  -1   7    3.70    0.53 
   3  -1   7    6.03    0.13 
   4  -1   7   12.97    0.26 
   5  -1   7    7.85    0.17 
   6  -1   7    0.23    0.03 
   7  -1   7    2.54    0.11 
  -7   0   7    1.31    0.06 
  -6   0   7    0.31    0.04 
  -5   0   7   51.58    1.19 
  -4   0   7    1.01    0.07 
  -3   0   7  147.61    3.69 
  -2   0   7    1.22    0.34 
   3   0   7  139.12    3.41 
   4   0   7    1.05    0.04 
   5   0   7   49.95    1.18 
   6   0   7    0.24    0.03 
   7   0   7    1.40    0.08 
  -7   1   7    2.49    0.08 
  -6   1   7    0.20    0.03 
  -5   1   7    8.20    0.22 
  -4   1   7   12.44    0.46 
  -3   1   7    5.80    0.24 
  -2   1   7    3.23    0.40 
   3   1   7    5.73    0.22 
   4   1   7   12.86    0.32 
   5   1   7    8.18    0.21 
   6   1   7    0.19    0.03 
   7   1   7    2.46    0.12 
  -7   2   7    1.16    0.07 
  -6   2   7    2.20    0.10 
  -5   2   7    1.86    0.10 
  -3   2   7    0.96    0.14 
  -2   2   7    3.28    0.35 
   3   2   7    1.05    0.07 
   4   2   7    1.97    0.09 
   5   2   7    2.00    0.09 
   6   2   7    2.03    0.08 
   7   2   7    1.19    0.10 
  -7   3   7    1.51    0.08 
  -5   3   7    2.23    0.14 
  -4   3   7    2.31    0.15 
   3   3   7    6.02    0.23 
   4   3   7    2.45    0.11 
   5   3   7    2.74    0.12 
   6   3   7    1.18    0.08 
   7   3   7    1.34    0.07 
  -7   4   7    0.94    0.06 
  -6   4   7    1.37    0.09 
  -5   4   7    0.01    0.05 
  -4   4   7    2.19    0.17 
   3   4   7    8.20    0.31 
   4   4   7    2.30    0.10 
   5   4   7    0.04    0.03 
   6   4   7    1.37    0.07 
   7   4   7    0.97    0.05 
  -6   5   7    2.06    0.11 
  -5   5   7    1.09    0.11 
   3   5   7    0.49    0.07 
   4   5   7    0.67    0.06 
   5   5   7    1.01    0.07 
   6   5   7    2.09    0.09 
  -6   6   7    1.35    0.08 
  -5   6   7    1.10    0.12 
   4   6   7    1.18    0.07 
   5   6   7    1.17    0.07 
   6   6   7    1.39    0.07 
  -5   7   7    5.26    0.22 
   4   7   7    3.12    0.13 
   5   7   7    5.29    0.20 
   4   8   7    0.12    0.03 
  -2  -9   8    1.17    0.09 
  -1  -9   8    0.02    0.03 
   0  -9   8    3.35    0.14 
   1  -9   8    0.03    0.03 
   2  -9   8    1.44    0.08 
  -3  -8   8    1.66    0.07 
  -2  -8   8    0.56    0.04 
  -1  -8   8    5.60    0.15 
   0  -8   8    4.35    0.12 
   1  -8   8    5.60    0.22 
   2  -8   8    0.57    0.04 
   3  -8   8    1.65    0.06 
   4  -8   8    1.37    0.07 
  -5  -7   8    1.39    0.05 
  -4  -7   8    6.91    0.18 
  -3  -7   8    7.31    0.29 
  -2  -7   8   10.33    0.26 
  -1  -7   8    5.97    0.26 
   0  -7   8    1.08    0.05 
   2  -7   8   10.02    0.21 
   3  -7   8    7.36    0.26 
   4  -7   8    6.88    0.18 
   5  -7   8    1.26    0.07 
  -6  -6   8    1.57    0.08 
  -5  -6   8    1.00    0.08 
  -4  -6   8    1.97    0.12 
  -2  -6   8    1.45    0.06 
  -1  -6   8    1.75    0.07 
   0  -6   8    0.18    0.02 
   1  -6   8    1.85    0.06 
   2  -6   8    1.45    0.05 
   3  -6   8    3.80    0.18 
   4  -6   8    1.97    0.07 
   5  -6   8    0.89    0.04 
  -6  -5   8    0.61    0.06 
  -5  -5   8    9.01    0.33 
  -4  -5   8    5.99    0.29 
  -3  -5   8    1.49    0.10 
  -2  -5   8    6.98    0.27 
  -1  -5   8    0.25    0.02 
   0  -5   8   11.19    0.23 
   1  -5   8    0.25    0.03 
   2  -5   8    6.64    0.15 
   3  -5   8    1.46    0.05 
   5  -5   8    8.44    0.22 
   6  -5   8    0.76    0.03 
  -7  -4   8    0.66    0.05 
  -6  -4   8    0.42    0.07 
  -5  -4   8    3.51    0.16 
  -4  -4   8    0.87    0.09 
  -3  -4   8    7.14    0.29 
  -2  -4   8    7.01    0.19 
  -1  -4   8    2.51    0.08 
   0  -4   8    5.23    0.12 
   1  -4   8    2.51    0.07 
   2  -4   8    7.06    0.27 
   3  -4   8    7.54    0.16 
   4  -4   8    0.82    0.05 
   5  -4   8    3.51    0.10 
   6  -4   8    0.44    0.03 
   7  -4   8    0.84    0.04 
  -7  -3   8    0.22    0.04 
  -6  -3   8    0.03    0.04 
  -4  -3   8    1.26    0.10 
  -3  -3   8    5.12    0.14 
  -2  -3   8    2.85    0.09 
  -1  -3   8   11.68    0.30 
   0  -3   8    5.94    0.16 
   1  -3   8   12.08    0.24 
   2  -3   8    2.71    0.07 
   3  -3   8    4.97    0.15 
   4  -3   8    1.31    0.06 
   5  -3   8    6.81    0.29 
   6  -3   8    0.08    0.02 
   7  -3   8    0.21    0.03 
  -7  -2   8    1.31    0.08 
  -6  -2   8    2.22    0.12 
  -5  -2   8    1.92    0.07 
  -4  -2   8   -0.01    0.02 
  -3  -2   8    4.54    0.13 
  -2  -2   8   21.74    0.65 
  -1  -2   8   13.11    0.45 
   1  -2   8   13.72    0.32 
   2  -2   8   21.30    0.36 
   3  -2   8    4.62    0.10 
   4  -2   8    0.02    0.02 
   5  -2   8    2.05    0.07 
   6  -2   8    1.98    0.10 
   7  -2   8    1.22    0.07 
  -7  -1   8    0.12    0.04 
  -6  -1   8    0.14    0.04 
  -5  -1   8    2.13    0.08 
  -4  -1   8    7.33    0.27 
  -3  -1   8   15.77    0.39 
  -2  -1   8   18.68    0.57 
   2  -1   8   18.69    0.37 
   3  -1   8   15.79    0.31 
   4  -1   8    6.96    0.15 
   5  -1   8    2.25    0.06 
   6  -1   8    0.16    0.03 
   7  -1   8    0.08    0.03 
  -7   0   8    2.08    0.07 
  -6   0   8    1.83    0.09 
  -5   0   8    0.37    0.07 
  -4   0   8   10.08    0.27 
  -3   0   8    4.41    0.19 
  -2   0   8    7.24    0.27 
   2   0   8    7.38    0.26 
   3   0   8    5.05    0.11 
   4   0   8   10.38    0.26 
   5   0   8    0.34    0.04 
   6   0   8    1.85    0.11 
   7   0   8    2.09    0.10 
  -7   1   8    0.09    0.03 
  -6   1   8    0.16    0.03 
  -5   1   8    2.24    0.11 
  -4   1   8    7.29    0.28 
  -3   1   8   15.63    0.56 
   2   1   8   18.80    0.64 
   3   1   8   15.77    0.54 
   4   1   8    7.03    0.19 
   5   1   8    2.17    0.08 
   6   1   8    0.15    0.03 
   7   1   8    0.01    0.04 
  -7   2   8    1.30    0.07 
  -5   2   8    1.91    0.12 
  -4   2   8    0.04    0.05 
  -3   2   8    4.32    0.21 
   2   2   8   20.94    0.72 
   3   2   8    4.64    0.18 
   4   2   8    0.04    0.02 
   5   2   8    1.97    0.09 
  -7   3   8    0.17    0.03 
  -6   3   8    0.05    0.04 
  -4   3   8    1.25    0.12 
  -3   3   8    4.55    0.24 
   2   3   8    2.65    0.14 
   3   3   8    5.34    0.20 
   4   3   8    1.48    0.08 
   6   3   8    0.08    0.03 
   7   3   8    0.17    0.03 
  -7   4   8    0.86    0.05 
  -6   4   8    0.46    0.06 
  -5   4   8    3.43    0.17 
  -4   4   8    0.78    0.12 
   3   4   8    7.46    0.27 
   4   4   8    0.84    0.06 
   5   4   8    3.68    0.14 
   6   4   8    0.43    0.04 
   7   4   8    0.74    0.05 
  -6   5   8    0.83    0.07 
  -5   5   8    8.15    0.33 
  -4   5   8    4.99    0.25 
   3   5   8    1.54    0.09 
   4   5   8    5.25    0.22 
   5   5   8    8.48    0.31 
   6   5   8    0.78    0.05 
  -6   6   8    1.65    0.08 
  -5   6   8    1.03    0.10 
   3   6   8    2.82    0.14 
   4   6   8    2.17    0.10 
   5   6   8    0.96    0.06 
   6   6   8    1.62    0.07 
  -5   7   8    1.23    0.10 
   3   7   8    7.85    0.28 
   4   7   8    6.83    0.25 
   5   7   8    1.38    0.07 
   4   8   8    1.31    0.07 
  -1  -9   9    3.27    0.17 
   0  -9   9    0.06    0.03 
   1  -9   9    3.05    0.13 
   2  -9   9    0.58    0.05 
  -3  -8   9    0.42    0.04 
  -2  -8   9    0.44    0.03 
  -1  -8   9    0.56    0.04 
   0  -8   9    0.09    0.02 
   1  -8   9    0.59    0.04 
   2  -8   9    0.42    0.04 
   3  -8   9    0.47    0.05 
  -4  -7   9    0.95    0.04 
  -3  -7   9    0.91    0.05 
  -2  -7   9    8.84    0.23 
  -1  -7   9    0.33    0.04 
   0  -7   9   24.91    0.60 
   1  -7   9    0.24    0.02 
   2  -7   9    9.30    0.24 
   3  -7   9    0.89    0.04 
   4  -7   9    0.84    0.04 
   5  -7   9    0.30    0.04 
  -5  -6   9    3.67    0.16 
  -4  -6   9    3.09    0.15 
  -3  -6   9    7.36    0.20 
  -2  -6   9   12.82    0.33 
  -1  -6   9    8.45    0.22 
   0  -6   9    4.17    0.10 
   1  -6   9    8.32    0.18 
   2  -6   9   12.79    0.26 
   3  -6   9    7.43    0.16 
   4  -6   9    3.34    0.09 
   5  -6   9    3.70    0.10 
  -6  -5   9    6.44    0.24 
  -5  -5   9    2.24    0.11 
  -4  -5   9   20.85    0.73 
  -3  -5   9    8.51    0.33 
  -2  -5   9   38.84    1.34 
  -1  -5   9    9.67    0.17 
   0  -5   9    5.27    0.12 
   1  -5   9    9.48    0.20 
   2  -5   9   39.24    0.77 
   3  -5   9    8.94    0.19 
   4  -5   9   20.45    0.50 
   5  -5   9    2.06    0.07 
   6  -5   9    6.33    0.16 
  -6  -4   9    6.01    0.23 
  -5  -4   9    2.18    0.13 
  -4  -4   9    7.14    0.29 
  -3  -4   9    2.36    0.13 
  -2  -4   9    6.19    0.26 
  -1  -4   9    5.84    0.13 
   0  -4   9    1.59    0.06 
   1  -4   9    6.07    0.17 
   2  -4   9    6.65    0.14 
   3  -4   9    2.37    0.07 
   4  -4   9    7.30    0.19 
   5  -4   9    2.08    0.11 
   6  -4   9    5.92    0.15 
  -7  -3   9    3.40    0.13 
  -6  -3   9    2.20    0.12 
  -5  -3   9    4.23    0.19 
  -4  -3   9    6.34    0.25 
  -3  -3   9    2.02    0.12 
  -2  -3   9   15.21    0.30 
  -1  -3   9    1.31    0.05 
   0  -3   9    0.80    0.04 
   1  -3   9    1.38    0.05 
   2  -3   9   15.16    0.31 
   3  -3   9    1.99    0.07 
   4  -3   9    6.13    0.17 
   5  -3   9    4.16    0.12 
   6  -3   9    2.24    0.07 
   7  -3   9    3.28    0.12 
  -7  -2   9    0.75    0.08 
  -6  -2   9    2.60    0.13 
  -5  -2   9    1.19    0.06 
  -4  -2   9    1.12    0.06 
  -3  -2   9    0.21    0.05 
  -2  -2   9   13.91    0.36 
  -1  -2   9    3.83    0.15 
   0  -2   9    2.23    0.06 
   1  -2   9    3.79    0.08 
   2  -2   9   15.12    0.29 
   3  -2   9    0.20    0.03 
   4  -2   9    1.11    0.05 
   5  -2   9    1.17    0.10 
   6  -2   9    2.43    0.08 
   7  -2   9    0.72    0.05 
  -6  -1   9    3.62    0.11 
  -5  -1   9    6.08    0.18 
  -4  -1   9   12.56    0.32 
  -3  -1   9    5.82    0.22 
  -2  -1   9    4.70    0.18 
  -1  -1   9    1.21    0.07 
   0  -1   9   25.77    0.84 
   1  -1   9    1.16    0.04 
   2  -1   9    4.71    0.10 
   3  -1   9    5.79    0.13 
   4  -1   9   12.71    0.26 
   5  -1   9    6.46    0.17 
   6  -1   9    3.69    0.15 
   7  -1   9    0.89    0.06 
  -6   0   9    0.11    0.03 
  -5   0   9    0.10    0.03 
  -4   0   9   15.60    0.53 
  -3   0   9    2.46    0.12 
  -1   0   9    0.71    0.06 
   1   0   9    0.60    0.04 
   2   0   9   15.71    0.32 
   3   0   9    2.26    0.06 
   4   0   9   14.80    0.30 
   5   0   9    0.06    0.02 
   6   0   9    0.13    0.04 
   7   0   9    2.29    0.10 
  -7   1   9    0.92    0.05 
  -6   1   9    3.61    0.15 
  -5   1   9    6.72    0.25 
  -4   1   9   13.24    0.46 
  -3   1   9    5.73    0.23 
  -2   1   9    4.26    0.19 
  -1   1   9    1.10    0.08 
   1   1   9    1.16    0.08 
   2   1   9    4.60    0.13 
   3   1   9    5.80    0.16 
   4   1   9   12.62    0.32 
   5   1   9    6.85    0.18 
   6   1   9    3.53    0.10 
   7   1   9    0.88    0.08 
  -7   2   9    0.73    0.05 
  -6   2   9    2.56    0.12 
  -4   2   9    1.09    0.10 
  -2   2   9   14.50    0.52 
   1   2   9    3.95    0.17 
   2   2   9   14.50    0.51 
   3   2   9    0.18    0.05 
   4   2   9    1.18    0.07 
   6   2   9    2.52    0.10 
  -7   3   9    3.30    0.12 
  -6   3   9    2.17    0.11 
  -5   3   9    4.21    0.18 
  -4   3   9    6.02    0.26 
  -3   3   9    1.83    0.13 
   2   3   9   15.43    0.53 
   3   3   9    2.05    0.10 
   4   3   9    6.28    0.24 
   5   3   9    4.20    0.17 
   6   3   9    2.15    0.09 
  -6   4   9    6.22    0.22 
  -5   4   9    2.23    0.12 
  -4   4   9    7.16    0.29 
   2   4   9    6.49    0.26 
   3   4   9    2.28    0.11 
   4   4   9    7.42    0.27 
   6   4   9    6.17    0.22 
  -6   5   9    6.99    0.24 
  -5   5   9    1.97    0.11 
   3   5   9    8.50    0.32 
   4   5   9   20.75    0.71 
   5   5   9    2.06    0.10 
   6   5   9    6.77    0.23 
  -5   6   9    3.89    0.16 
   3   6   9    7.08    0.27 
   4   6   9    3.34    0.14 
   5   6   9    3.87    0.15 
   3   7   9    0.91    0.08 
   4   7   9    0.94    0.06 
   4   8   9    0.92    0.06 
   0  -9  10    0.05    0.04 
   1  -9  10    1.32    0.08 
  -3  -8  10    0.34    0.04 
  -2  -8  10    0.90    0.05 
  -1  -8  10    0.05    0.04 
   0  -8  10    0.99    0.04 
   1  -8  10    0.10    0.02 
   2  -8  10    0.86    0.04 
   3  -8  10    0.41    0.05 
  -4  -7  10    3.25    0.12 
  -3  -7  10    0.22    0.04 
  -2  -7  10    2.26    0.10 
  -1  -7  10    1.72    0.11 
   0  -7  10    1.64    0.05 
   1  -7  10    1.81    0.07 
   2  -7  10    2.18    0.06 
   3  -7  10    0.29    0.03 
   4  -7  10    3.10    0.09 
  -5  -6  10    5.18    0.13 
  -4  -6  10    1.01    0.05 
  -3  -6  10    2.00    0.14 
  -2  -6  10    0.96    0.07 
  -1  -6  10    1.67    0.09 
   0  -6  10    7.41    0.16 
   1  -6  10    1.95    0.10 
   2  -6  10    1.16    0.04 
   4  -6  10    0.95    0.04 
   5  -6  10    4.94    0.13 
  -6  -5  10    6.58    0.16 
  -5  -5  10    2.64    0.13 
  -4  -5  10   13.08    0.47 
  -3  -5  10   13.01    0.50 
  -2  -5  10   21.48    0.43 
  -1  -5  10   12.31    0.31 
   0  -5  10   29.01    0.57 
   1  -5  10   12.25    0.25 
   2  -5  10   21.91    0.43 
   3  -5  10   14.96    0.35 
   5  -5  10    2.82    0.08 
   6  -5  10    6.39    0.23 
  -6  -4  10    2.64    0.12 
  -5  -4  10    0.56    0.08 
  -4  -4  10    2.32    0.13 
  -3  -4  10    2.33    0.09 
  -2  -4  10   17.90    0.45 
  -1  -4  10   17.61    0.42 
   0  -4  10   56.37    1.30 
   1  -4  10   17.70    0.35 
   2  -4  10   18.48    0.36 
   3  -4  10    2.29    0.08 
   4  -4  10    2.37    0.08 
   5  -4  10    0.64    0.04 
   6  -4  10    2.65    0.07 
  -6  -3  10    5.66    0.21 
  -4  -3  10    7.45    0.21 
  -3  -3  10    6.92    0.16 
  -2  -3  10   13.95    0.36 
  -1  -3  10    6.56    0.14 
   0  -3  10   27.65    0.53 
   1  -3  10    6.19    0.25 
   2  -3  10   15.25    0.36 
   3  -3  10    7.42    0.19 
   4  -3  10    7.71    0.20 
   5  -3  10    0.12    0.04 
   6  -3  10    5.34    0.14 
  -6  -2  10    3.97    0.17 
  -4  -2  10    0.32    0.04 
  -3  -2  10    5.85    0.17 
  -2  -2  10    7.94    0.28 
  -1  -2  10   17.20    0.41 
   0  -2  10    2.06    0.06 
   1  -2  10   16.88    0.34 
   2  -2  10    7.08    0.19 
   3  -2  10    6.07    0.13 
   4  -2  10    0.27    0.03 
   5  -2  10   15.68    0.39 
   6  -2  10    3.67    0.11 
   7  -2  10    1.18    0.07 
  -6  -1  10    1.03    0.06 
  -5  -1  10    0.47    0.05 
  -4  -1  10    1.00    0.07 
  -3  -1  10   21.10    0.70 
  -2  -1  10    5.02    0.19 
  -1  -1  10   19.18    0.48 
   0  -1  10   18.43    0.44 
   1  -1  10   19.75    0.39 
   2  -1  10    5.07    0.11 
   3  -1  10   20.19    0.40 
   4  -1  10    1.05    0.04 
   5  -1  10    0.50    0.05 
   6  -1  10    1.02    0.07 
  -6   0  10    5.77    0.21 
  -5   0  10    0.11    0.03 
  -4   0  10    0.04    0.03 
  -3   0  10    2.09    0.10 
  -2   0  10   14.70    0.51 
  -1   0  10    1.82    0.09 
   0   0  10   13.55    0.47 
   1   0  10    1.96    0.06 
   2   0  10   14.68    0.29 
   3   0  10    1.92    0.07 
   4   0  10    0.07    0.02 
   5   0  10    0.06    0.02 
   6   0  10    6.14    0.23 
   7   0  10    0.01    0.03 
  -7   1  10    1.88    0.08 
  -6   1  10    1.20    0.07 
  -5   1  10    0.61    0.06 
  -4   1  10    1.02    0.08 
  -3   1  10   20.78    0.70 
  -2   1  10    5.02    0.20 
  -1   1  10   19.90    0.68 
   0   1  10   17.92    0.62 
   1   1  10   19.92    0.48 
   2   1  10    4.72    0.13 
   3   1  10   19.20    0.50 
   4   1  10    1.16    0.06 
   5   1  10    0.50    0.04 
   6   1  10    1.12    0.05 
   7   1  10    2.05    0.11 
  -7   2  10    1.16    0.06 
  -6   2  10    3.91    0.15 
  -5   2  10   16.85    0.56 
  -4   2  10    0.20    0.04 
  -3   2  10    5.87    0.24 
  -2   2  10    7.70    0.29 
  -1   2  10   16.58    0.59 
   0   2  10    1.89    0.11 
   1   2  10   16.30    0.58 
   2   2  10    7.37    0.19 
   3   2  10    6.21    0.23 
   4   2  10    0.23    0.05 
   5   2  10   16.63    0.55 
   6   2  10    3.75    0.14 
  -6   3  10    5.73    0.21 
  -4   3  10    8.16    0.30 
  -3   3  10    7.34    0.28 
  -2   3  10   13.84    0.54 
   0   3  10   27.87    0.97 
   1   3  10    6.03    0.24 
   2   3  10   14.85    0.51 
   3   3  10    7.47    0.27 
   4   3  10    7.99    0.28 
   5   3  10    0.15    0.03 
   6   3  10    5.82    0.20 
  -6   4  10    2.66    0.11 
  -5   4  10    0.50    0.07 
  -4   4  10    2.38    0.13 
  -3   4  10    2.29    0.14 
   2   4  10   18.00    0.63 
   3   4  10    2.56    0.11 
   4   4  10    2.40    0.11 
   5   4  10    0.52    0.05 
   6   4  10    2.68    0.10 
  -6   5  10    6.07    0.24 
  -5   5  10    2.85    0.13 
  -4   5  10   13.86    0.47 
   2   5  10   21.05    0.74 
   3   5  10   13.18    0.48 
   4   5  10   12.73    0.45 
   5   5  10    2.66    0.11 
   6   5  10    6.72    0.23 
  -5   6  10    4.86    0.22 
  -4   6  10    1.07    0.10 
   3   6  10    1.53    0.09 
   4   6  10    0.89    0.06 
   5   6  10    5.12    0.18 
   3   7  10    0.26    0.04 
   4   7  10    3.27    0.13 
   3   8  10    0.29    0.08 
  -1  -8  11    0.49    0.04 
   0  -8  11    0.03    0.02 
   1  -8  11    0.45    0.05 
   2  -8  11    0.52    0.05 
   3  -8  11    0.17    0.03 
  -4  -7  11    1.55    0.07 
  -3  -7  11    0.48    0.04 
  -2  -7  11    2.11    0.09 
  -1  -7  11    3.23    0.13 
   0  -7  11    0.07    0.02 
   1  -7  11    3.15    0.08 
   2  -7  11    1.89    0.06 
   3  -7  11    0.51    0.03 
   4  -7  11    1.51    0.07 
  -5  -6  11    0.61    0.04 
  -4  -6  11    1.27    0.07 
  -3  -6  11    0.29    0.05 
  -2  -6  11    5.84    0.22 
  -1  -6  11    1.82    0.07 
   0  -6  11    0.05    0.02 
   1  -6  11    1.96    0.06 
   2  -6  11    5.43    0.17 
   3  -6  11    0.41    0.03 
   4  -6  11    1.17    0.04 
   5  -6  11    0.55    0.03 
  -5  -5  11    0.31    0.03 
  -4  -5  11    6.41    0.17 
  -3  -5  11    1.02    0.06 
  -2  -5  11   14.85    0.52 
  -1  -5  11   13.85    0.34 
   0  -5  11   38.61    0.76 
   1  -5  11   14.13    0.28 
   2  -5  11   15.92    0.56 
   3  -5  11    1.17    0.05 
   4  -5  11    6.34    0.17 
   5  -5  11    0.33    0.03 
  -6  -4  11    3.56    0.14 
  -5  -4  11    0.59    0.07 
  -4  -4  11   22.85    0.80 
  -3  -4  11    0.97    0.07 
  -2  -4  11   19.97    0.40 
  -1  -4  11    2.36    0.08 
   0  -4  11    7.74    0.20 
   1  -4  11    2.14    0.06 
   2  -4  11   19.76    0.48 
   4  -4  11   22.26    0.56 
   5  -4  11    0.77    0.04 
   6  -4  11    3.80    0.10 
  -5  -3  11    1.09    0.10 
  -4  -3  11   15.41    0.40 
  -3  -3  11    5.31    0.15 
  -2  -3  11   17.85    0.31 
  -1  -3  11   12.65    0.25 
   0  -3  11   47.45    0.92 
   1  -3  11   12.65    0.31 
   2  -3  11   17.61    0.44 
   3  -3  11    5.35    0.15 
   4  -3  11   16.07    0.40 
   5  -3  11    0.95    0.05 
   6  -3  11    7.73    0.20 
  -3  -2  11   12.09    0.43 
  -2  -2  11   29.92    1.02 
  -1  -2  11    4.99    0.13 
   0  -2  11    4.88    0.15 
   1  -2  11    5.03    0.14 
   2  -2  11   29.90    0.59 
   3  -2  11   11.81    0.25 
   5  -2  11    1.92    0.07 
   6  -2  11    1.99    0.07 
  -4  -1  11   12.68    0.44 
  -3  -1  11    2.30    0.11 
  -2  -1  11   10.00    0.35 
  -1  -1  11    6.80    0.26 
   0  -1  11    6.62    0.14 
   1  -1  11    6.48    0.18 
   2  -1  11   10.01    0.20 
   3  -1  11    2.27    0.06 
   4  -1  11   12.60    0.26 
   5  -1  11    0.22    0.03 
   6  -1  11    0.76    0.06 
  -6   0  11    0.13    0.02 
  -5   0  11    3.24    0.13 
  -4   0  11    0.04    0.03 
  -3   0  11   16.91    0.56 
  -2   0  11    0.48    0.06 
  -1   0  11    1.91    0.09 
   0   0  11    0.01    0.02 
   1   0  11    1.88    0.06 
   2   0  11    0.50    0.03 
   3   0  11   15.80    0.32 
   4   0  11    0.03    0.02 
   5   0  11    3.60    0.15 
   6   0  11    0.14    0.04 
  -6   1  11    0.86    0.05 
  -5   1  11    0.25    0.05 
  -4   1  11   13.41    0.45 
  -3   1  11    2.34    0.11 
  -2   1  11   10.15    0.36 
  -1   1  11    6.67    0.25 
   0   1  11    6.65    0.25 
   1   1  11    7.07    0.18 
   2   1  11    9.27    0.25 
   3   1  11    2.30    0.08 
   4   1  11   12.46    0.32 
   5   1  11    0.22    0.04 
   6   1  11    0.82    0.09 
  -6   2  11    1.98    0.09 
  -5   2  11    1.98    0.10 
  -4   2  11    8.46    0.36 
  -3   2  11   12.75    0.44 
  -2   2  11   30.21    1.03 
  -1   2  11    4.72    0.21 
   0   2  11    5.18    0.20 
   1   2  11    4.71    0.19 
   2   2  11   30.19    0.72 
   3   2  11   12.71    0.43 
   4   2  11   10.23    0.37 
   5   2  11    1.86    0.09 
   6   2  11    1.94    0.08 
  -6   3  11    8.19    0.28 
  -5   3  11    1.05    0.07 
  -4   3  11   16.14    0.57 
  -3   3  11    5.64    0.22 
  -2   3  11   18.00    0.62 
  -1   3  11   12.35    0.45 
   0   3  11   47.72    1.63 
   1   3  11   12.21    0.31 
   2   3  11   18.24    0.61 
   3   3  11    5.11    0.20 
   4   3  11   16.95    0.56 
   5   3  11    1.02    0.06 
   6   3  11    7.97    0.27 
  -6   4  11    3.94    0.14 
  -5   4  11    0.67    0.06 
  -4   4  11   23.85    0.79 
  -3   4  11    1.02    0.09 
  -2   4  11   19.92    0.69 
   0   4  11    8.11    0.32 
   1   4  11    2.07    0.11 
   2   4  11   20.37    0.68 
   3   4  11    1.17    0.10 
   4   4  11   22.53    0.80 
   5   4  11    0.84    0.05 
   6   4  11    3.73    0.14 
  -5   5  11    0.41    0.05 
  -4   5  11    6.37    0.24 
  -3   5  11    0.94    0.10 
   2   5  11   14.73    0.52 
   3   5  11    0.99    0.09 
   4   5  11    6.38    0.23 
   5   5  11    0.32    0.04 
  -5   6  11    0.52    0.05 
  -4   6  11    1.33    0.09 
   2   6  11    5.98    0.22 
   3   6  11    0.35    0.05 
   4   6  11    1.08    0.06 
   5   6  11    0.62    0.04 
   3   7  11    0.54    0.05 
   4   7  11    1.57    0.07 
  -3  -7  12    0.39    0.03 
  -2  -7  12    0.80    0.05 
  -1  -7  12    1.49    0.07 
   0  -7  12    0.07    0.02 
   1  -7  12    1.56    0.05 
   2  -7  12    0.86    0.04 
   3  -7  12    0.36    0.03 
  -4  -6  12    0.43    0.04 
  -3  -6  12    0.16    0.03 
  -2  -6  12    0.63    0.05 
  -1  -6  12    1.72    0.06 
   0  -6  12    9.78    0.21 
   1  -6  12    1.64    0.06 
   2  -6  12    0.77    0.04 
   3  -6  12    0.20    0.02 
   4  -6  12    0.39    0.03 
  -5  -5  12    0.97    0.06 
  -4  -5  12    6.08    0.23 
  -3  -5  12    1.33    0.08 
  -2  -5  12    9.59    0.26 
  -1  -5  12    0.26    0.03 
   0  -5  12   13.75    0.34 
   1  -5  12    0.32    0.03 
   2  -5  12   10.01    0.25 
   3  -5  12    1.34    0.05 
   4  -5  12    6.19    0.16 
   5  -5  12    0.94    0.04 
  -5  -4  12    6.71    0.24 
  -4  -4  12    3.75    0.11 
  -3  -4  12    3.69    0.16 
  -1  -4  12    6.57    0.17 
   0  -4  12   12.28    0.30 
   1  -4  12    6.39    0.17 
   3  -4  12    3.87    0.11 
   4  -4  12    3.57    0.10 
   5  -4  12    6.53    0.17 
  -6  -3  12    4.30    0.17 
  -4  -3  12   29.65    1.04 
  -3  -3  12   41.79    1.02 
  -2  -3  12   48.49    1.14 
  -1  -3  12   15.76    0.31 
   0  -3  12   33.18    0.80 
   1  -3  12   14.60    0.38 
   2  -3  12   47.04    1.14 
   3  -3  12   43.82    1.02 
   5  -3  12   12.08    0.30 
   6  -3  12    4.35    0.16 
  -6  -2  12    2.01    0.10 
  -5  -2  12    3.38    0.14 
  -4  -2  12   14.54    0.53 
  -3  -2  12    0.86    0.06 
  -2  -2  12   15.10    0.37 
  -1  -2  12    9.36    0.19 
   0  -2  12   27.68    0.54 
   1  -2  12    8.91    0.19 
   2  -2  12   14.31    0.30 
   3  -2  12    1.04    0.05 
   4  -2  12   15.21    0.38 
   5  -2  12    3.43    0.10 
   6  -2  12    1.99    0.09 
  -5  -1  12    2.27    0.09 
  -4  -1  12    2.52    0.11 
  -3  -1  12    7.31    0.19 
  -2  -1  12    0.71    0.05 
  -1  -1  12    0.03    0.02 
   0  -1  12    1.65    0.05 
   1  -1  12    0.03    0.02 
   2  -1  12    0.93    0.04 
   3  -1  12    6.95    0.15 
   4  -1  12    2.69    0.07 
   5  -1  12    2.32    0.08 
   6  -1  12    1.57    0.08 
  -6   0  12    0.06    0.03 
  -5   0  12    0.06    0.02 
  -4   0  12    1.83    0.09 
  -3   0  12    0.88    0.07 
  -2   0  12    0.95    0.07 
  -1   0  12    1.23    0.07 
   0   0  12    2.36    0.08 
   1   0  12    1.31    0.05 
   2   0  12    0.91    0.04 
   3   0  12    0.76    0.04 
   4   0  12    1.81    0.05 
   5   0  12    0.03    0.02 
   6   0  12    0.00    0.04 
  -6   1  12    1.59    0.07 
  -5   1  12    2.37    0.10 
  -4   1  12    2.70    0.12 
  -3   1  12    7.31    0.27 
  -2   1  12    0.83    0.07 
  -1   1  12    0.00    0.03 
   0   1  12    1.56    0.09 
   1   1  12    0.02    0.02 
   2   1  12    0.81    0.05 
   3   1  12    7.38    0.19 
   4   1  12    2.55    0.11 
   5   1  12    2.29    0.10 
  -6   2  12    2.14    0.08 
  -5   2  12    3.69    0.14 
  -4   2  12   17.14    0.55 
  -3   2  12    1.11    0.08 
  -2   2  12   15.12    0.52 
  -1   2  12    9.17    0.33 
   0   2  12   27.64    0.94 
   1   2  12    9.20    0.23 
   2   2  12   15.22    0.37 
   3   2  12    0.87    0.06 
   4   2  12   16.20    0.54 
   5   2  12    3.44    0.14 
  -6   3  12    4.20    0.16 
  -5   3  12   12.32    0.42 
  -4   3  12   31.67    1.06 
  -3   3  12   43.51    1.44 
  -2   3  12   48.86    1.61 
  -1   3  12   14.70    0.54 
   0   3  12   32.40    1.13 
   1   3  12   15.32    0.38 
   2   3  12   48.01    1.61 
   3   3  12   46.16    1.45 
   5   3  12   12.03    0.42 
   6   3  12    4.27    0.16 
  -5   4  12    6.62    0.24 
  -4   4  12    3.89    0.16 
  -3   4  12    3.48    0.16 
  -2   4  12   13.36    0.53 
  -1   4  12    6.45    0.25 
   0   4  12   12.14    0.43 
   1   4  12    6.51    0.24 
   2   4  12   15.05    0.54 
   3   4  12    4.00    0.15 
   4   4  12    3.83    0.15 
   5   4  12    7.07    0.24 
  -5   5  12    1.08    0.07 
  -4   5  12    6.31    0.23 
  -3   5  12    1.44    0.09 
  -2   5  12   10.42    0.36 
  -1   5  12    0.29    0.05 
   0   5  12   13.74    0.49 
   1   5  12    0.31    0.04 
   3   5  12    1.37    0.07 
   4   5  12    6.46    0.23 
   5   5  12    1.04    0.05 
  -4   6  12    0.43    0.06 
  -3   6  12    0.26    0.05 
   1   6  12    1.63    0.10 
   2   6  12    0.71    0.06 
   4   6  12    0.44    0.04 
   3   7  12    0.33    0.04 
  -2  -7  13    1.30    0.06 
  -1  -7  13    0.63    0.04 
   0  -7  13    4.82    0.18 
   1  -7  13    0.61    0.03 
   2  -7  13    1.34    0.04 
  -4  -6  13    0.03    0.03 
  -3  -6  13    0.41    0.04 
  -2  -6  13    0.50    0.05 
  -1  -6  13    0.24    0.03 
   0  -6  13    0.02    0.02 
   1  -6  13    0.23    0.03 
   2  -6  13    0.54    0.03 
   3  -6  13    0.43    0.03 
   4  -6  13    0.05    0.02 
  -4  -5  13    1.96    0.09 
  -3  -5  13    1.21    0.07 
  -2  -5  13    2.67    0.08 
  -1  -5  13    0.56    0.04 
   0  -5  13    0.36    0.04 
   1  -5  13    0.44    0.06 
   2  -5  13    2.65    0.08 
   3  -5  13    1.22    0.05 
   4  -5  13    2.07    0.06 
  -5  -4  13    0.69    0.05 
  -4  -4  13    1.17    0.07 
  -3  -4  13    7.96    0.21 
  -2  -4  13    0.11    0.02 
  -1  -4  13   10.67    0.27 
   0  -4  13    0.06    0.02 
   1  -4  13   10.42    0.26 
   2  -4  13    0.15    0.02 
   3  -4  13    7.96    0.21 
   4  -4  13    1.11    0.04 
   5  -4  13    0.68    0.03 
  -5  -3  13    6.60    0.24 
  -4  -3  13    7.68    0.21 
  -3  -3  13    0.93    0.08 
  -2  -3  13   23.78    0.58 
  -1  -3  13   21.72    0.53 
   0  -3  13   20.41    0.73 
   1  -3  13   21.74    0.52 
   2  -3  13   24.63    0.58 
   3  -3  13    0.83    0.05 
   4  -3  13    8.37    0.21 
   5  -3  13    6.37    0.17 
  -5  -2  13    0.72    0.07 
  -4  -2  13    3.01    0.10 
  -3  -2  13   10.27    0.21 
  -2  -2  13    1.68    0.05 
  -1  -2  13    2.99    0.07 
   0  -2  13    5.74    0.13 
   1  -2  13    2.74    0.07 
   2  -2  13    1.84    0.05 
   3  -2  13    9.66    0.25 
   4  -2  13    2.92    0.09 
   5  -2  13    0.65    0.04 
  -5  -1  13    1.44    0.05 
  -4  -1  13    2.21    0.08 
  -3  -1  13    2.74    0.09 
  -2  -1  13    6.45    0.18 
  -1  -1  13    1.76    0.06 
   0  -1  13   12.10    0.25 
   1  -1  13    1.81    0.05 
   2  -1  13    6.35    0.14 
   3  -1  13    2.65    0.07 
   4  -1  13    2.33    0.08 
   5  -1  13    1.42    0.06 
   6  -1  13    3.20    0.13 
  -6   0  13    0.10    0.03 
  -5   0  13    0.46    0.04 
  -4   0  13    1.82    0.09 
  -3   0  13    4.99    0.21 
  -2   0  13    0.80    0.06 
  -1   0  13    0.16    0.03 
   0   0  13   -0.01    0.02 
   1   0  13    0.21    0.02 
   2   0  13    0.85    0.04 
   3   0  13    4.27    0.13 
   4   0  13    1.74    0.05 
   5   0  13    0.46    0.07 
   6   0  13   -0.03    0.04 
  -6   1  13    3.17    0.12 
  -5   1  13    1.50    0.07 
  -3   1  13    2.77    0.12 
  -2   1  13    6.61    0.24 
  -1   1  13    1.85    0.09 
   0   1  13   12.00    0.30 
   1   1  13    1.82    0.06 
   2   1  13    6.55    0.17 
   3   1  13    2.72    0.08 
   4   1  13    2.10    0.12 
   5   1  13    1.32    0.07 
  -5   2  13    0.68    0.05 
  -4   2  13    3.27    0.13 
  -3   2  13   10.36    0.36 
  -2   2  13    1.67    0.09 
  -1   2  13    2.91    0.13 
   0   2  13    5.86    0.22 
   1   2  13    2.92    0.09 
   2   2  13    1.71    0.07 
   3   2  13   10.43    0.36 
   4   2  13    3.13    0.12 
   5   2  13    0.72    0.05 
  -5   3  13    6.82    0.24 
  -4   3  13    7.87    0.29 
  -3   3  13    0.76    0.07 
  -2   3  13   23.95    0.82 
  -1   3  13   21.32    0.74 
   0   3  13   21.52    0.73 
   1   3  13   21.01    0.52 
   2   3  13   24.36    0.82 
   3   3  13    0.81    0.06 
   4   3  13    8.53    0.29 
   5   3  13    6.96    0.23 
  -5   4  13    0.75    0.05 
  -4   4  13    1.12    0.07 
  -3   4  13    8.12    0.29 
  -2   4  13    0.14    0.05 
  -1   4  13   10.44    0.38 
   0   4  13    0.06    0.03 
   1   4  13   10.54    0.37 
   3   4  13    8.11    0.29 
   4   4  13    1.11    0.06 
   5   4  13    0.72    0.04 
  -4   5  13    2.04    0.09 
  -3   5  13    1.19    0.08 
  -2   5  13    2.85    0.12 
  -1   5  13    0.49    0.07 
   0   5  13    0.38    0.06 
   1   5  13    0.47    0.06 
   2   5  13    2.62    0.11 
   3   5  13    1.18    0.06 
   4   5  13    2.10    0.09 
  -4   6  13    0.05    0.03 
  -3   6  13    0.40    0.06 
  -2   6  13    0.61    0.07 
  -1   6  13    0.28    0.05 
   1   6  13    0.33    0.05 
   2   6  13    0.56    0.05 
   3   6  13    0.47    0.04 
   4   6  13    0.05    0.02 
   2   7  13    1.21    0.07 
  -1  -7  14    0.67    0.05 
   0  -7  14    0.11    0.02 
   1  -7  14    0.83    0.04 
  -3  -6  14    1.44    0.06 
  -2  -6  14    1.23    0.06 
  -1  -6  14    1.37    0.07 
   0  -6  14    1.78    0.06 
   1  -6  14    1.35    0.05 
   2  -6  14    1.10    0.04 
   3  -6  14    1.33    0.04 
  -3  -5  14    0.53    0.05 
  -2  -5  14    1.84    0.06 
  -1  -5  14    2.47    0.08 
   0  -5  14    0.17    0.02 
   1  -5  14    2.55    0.08 
   2  -5  14    1.79    0.06 
   3  -5  14    0.41    0.03 
   4  -5  14    0.22    0.02 
  -4  -4  14    1.11    0.07 
  -3  -4  14    0.13    0.02 
  -2  -4  14    1.66    0.06 
  -1  -4  14    0.18    0.04 
   0  -4  14    0.84    0.05 
   2  -4  14    1.50    0.06 
   3  -4  14    0.16    0.02 
   4  -4  14    1.04    0.04 
  -5  -3  14    1.12    0.07 
  -4  -3  14    0.66    0.04 
  -3  -3  14    0.33    0.04 
  -2  -3  14    5.60    0.26 
  -1  -3  14    0.01    0.02 
   0  -3  14    1.42    0.09 
   1  -3  14    0.01    0.02 
   2  -3  14    6.60    0.18 
   3  -3  14    0.41    0.04 
   4  -3  14    0.79    0.04 
   5  -3  14    1.31    0.04 
  -5  -2  14    3.89    0.16 
  -4  -2  14    6.22    0.16 
  -3  -2  14   13.46    0.28 
  -2  -2  14    1.32    0.04 
  -1  -2  14    4.42    0.12 
   0  -2  14    4.38    0.17 
   1  -2  14    3.94    0.12 
   2  -2  14    1.24    0.06 
   3  -2  14   13.88    0.35 
   4  -2  14    6.12    0.16 
   5  -2  14    4.20    0.11 
  -5  -1  14    0.81    0.06 
  -4  -1  14    0.91    0.04 
  -3  -1  14    1.16    0.07 
  -2  -1  14    1.12    0.04 
  -1  -1  14   16.82    0.35 
   0  -1  14    0.15    0.02 
   1  -1  14   17.25    0.35 
   2  -1  14    1.01    0.04 
   3  -1  14    1.28    0.05 
   4  -1  14    0.84    0.04 
   5  -1  14    0.84    0.06 
  -5   0  14    0.36    0.03 
  -4   0  14    1.19    0.06 
  -3   0  14    0.05    0.02 
  -2   0  14    0.84    0.06 
  -1   0  14    7.20    0.19 
   0   0  14    0.82    0.04 
   1   0  14    7.49    0.19 
   2   0  14    0.87    0.04 
   3   0  14    0.03    0.02 
   4   0  14    1.21    0.04 
   5   0  14    0.37    0.05 
  -5   1  14    0.81    0.05 
  -4   1  14    0.86    0.06 
  -3   1  14    1.12    0.07 
  -2   1  14    1.04    0.07 
  -1   1  14   17.77    0.59 
   0   1  14    0.11    0.02 
   1   1  14   17.48    0.42 
   2   1  14    1.02    0.05 
   3   1  14    1.17    0.05 
   4   1  14    0.81    0.05 
  -5   2  14    4.25    0.15 
  -4   2  14    6.49    0.23 
  -3   2  14   14.97    0.49 
  -2   2  14    1.31    0.08 
  -1   2  14    4.94    0.19 
   1   2  14    4.48    0.12 
   2   2  14    1.28    0.06 
   3   2  14   15.31    0.50 
   4   2  14    6.51    0.22 
   5   2  14    4.15    0.16 
  -5   3  14    1.25    0.06 
  -4   3  14    0.72    0.05 
  -3   3  14    0.43    0.05 
   0   3  14    1.52    0.06 
   1   3  14    0.04    0.02 
   2   3  14    6.88    0.24 
   3   3  14    0.27    0.04 
   4   3  14    0.71    0.05 
   5   3  14    1.11    0.07 
  -4   4  14    1.09    0.06 
  -3   4  14    0.13    0.03 
  -2   4  14    1.48    0.08 
  -1   4  14    0.09    0.03 
   0   4  14    0.95    0.05 
   1   4  14    0.06    0.03 
   2   4  14    1.56    0.08 
   3   4  14    0.12    0.02 
   4   4  14    1.06    0.06 
  -4   5  14    0.17    0.02 
  -3   5  14    0.51    0.05 
  -2   5  14    1.74    0.09 
  -1   5  14    2.61    0.08 
   0   5  14    0.11    0.03 
   1   5  14    2.53    0.11 
   2   5  14    1.77    0.08 
   3   5  14    0.47    0.04 
   4   5  14    0.26    0.04 
  -3   6  14    1.43    0.07 
  -2   6  14    1.10    0.07 
  -1   6  14    1.36    0.08 
   0   6  14    1.80    0.09 
   1   6  14    1.35    0.07 
   2   6  14    1.13    0.06 
   3   6  14    1.39    0.06 
   1   7  14    0.65    0.07 
  -2  -6  15    0.97    0.06 
  -1  -6  15    0.83    0.05 
   0  -6  15    1.95    0.06 
   1  -6  15    0.74    0.04 
   2  -6  15    1.04    0.05 
  -3  -5  15    3.91    0.14 
  -2  -5  15    0.25    0.03 
  -1  -5  15    6.34    0.16 
   0  -5  15    0.20    0.02 
   1  -5  15    6.47    0.16 
   2  -5  15    0.26    0.03 
   3  -5  15    3.93    0.10 
  -4  -4  15    0.13    0.03 
  -3  -4  15    0.36    0.04 
  -2  -4  15    0.64    0.04 
  -1  -4  15    1.13    0.05 
   0  -4  15    1.25    0.05 
   1  -4  15    1.22    0.05 
   2  -4  15    0.67    0.04 
   3  -4  15    0.27    0.03 
   4  -4  15    0.11    0.02 
  -4  -3  15    3.66    0.17 
  -3  -3  15    1.72    0.06 
  -2  -3  15    0.44    0.04 
  -1  -3  15    0.29    0.03 
   0  -3  15    0.19    0.03 
   1  -3  15    0.18    0.03 
   2  -3  15    0.44    0.04 
   3  -3  15    1.84    0.06 
   4  -3  15    3.56    0.09 
  -4  -2  15    1.30    0.06 
  -3  -2  15    8.54    0.22 
  -2  -2  15    1.38    0.06 
  -1  -2  15   11.31    0.29 
   0  -2  15    0.68    0.04 
   1  -2  15   12.72    0.30 
   2  -2  15    1.35    0.06 
   3  -2  15    8.85    0.22 
   4  -2  15    1.23    0.05 
  -5  -1  15    0.57    0.08 
  -4  -1  15    1.53    0.07 
  -3  -1  15    2.52    0.07 
  -2  -1  15    1.26    0.06 
  -1  -1  15    7.40    0.16 
   0  -1  15    0.20    0.02 
   1  -1  15    6.80    0.18 
   2  -1  15    1.35    0.05 
   3  -1  15    2.56    0.08 
   4  -1  15    1.68    0.06 
   5  -1  15    0.60    0.06 
  -5   0  15    2.10    0.08 
  -4   0  15    0.09    0.02 
  -3   0  15    0.61    0.05 
  -2   0  15    0.07    0.02 
  -1   0  15    0.65    0.04 
   0   0  15    0.01    0.02 
   1   0  15    0.71    0.04 
   2   0  15    0.07    0.04 
   3   0  15    0.63    0.03 
   4   0  15    0.08    0.07 
  -5   1  15    0.58    0.03 
  -4   1  15    1.65    0.07 
  -3   1  15    2.71    0.11 
  -1   1  15    7.09    0.18 
   0   1  15    0.16    0.02 
   1   1  15    7.03    0.18 
   2   1  15    1.39    0.08 
   3   1  15    2.51    0.08 
   4   1  15    1.56    0.07 
  -4   2  15    1.26    0.06 
  -3   2  15    8.99    0.31 
  -2   2  15    1.40    0.07 
  -1   2  15   12.30    0.30 
   0   2  15    0.64    0.04 
   1   2  15   11.47    0.29 
   2   2  15    1.40    0.05 
   3   2  15    8.73    0.31 
   4   2  15    1.34    0.06 
  -4   3  15    3.55    0.13 
  -3   3  15    1.90    0.08 
  -2   3  15    0.47    0.05 
  -1   3  15    0.23    0.03 
   0   3  15    0.21    0.02 
   1   3  15    0.25    0.03 
   2   3  15    0.42    0.04 
   3   3  15    1.78    0.08 
   4   3  15    3.55    0.13 
  -4   4  15    0.15    0.03 
  -3   4  15    0.34    0.04 
  -2   4  15    0.71    0.05 
  -1   4  15    1.17    0.05 
   0   4  15    1.24    0.05 
   1   4  15    1.19    0.06 
   2   4  15    0.62    0.05 
   3   4  15    0.26    0.03 
   4   4  15    0.13    0.03 
  -3   5  15    3.91    0.10 
  -2   5  15    0.22    0.03 
  -1   5  15    6.44    0.23 
   0   5  15    0.16    0.03 
   1   5  15    6.32    0.23 
   2   5  15    0.27    0.03 
   3   5  15    3.93    0.14 
  -2   6  15    1.04    0.06 
  -1   6  15    0.71    0.05 
   0   6  15    2.11    0.09 
   1   6  15    0.89    0.05 
   2   6  15    1.01    0.05 
  -1  -5  16    7.08    0.18 
   0  -5  16    0.04    0.01 
   1  -5  16    7.19    0.18 
   2  -5  16    0.66    0.05 
  -3  -4  16    1.50    0.07 
  -2  -4  16    1.14    0.05 
  -1  -4  16    1.16    0.05 
   0  -4  16    0.32    0.03 
   1  -4  16    1.17    0.04 
   2  -4  16    1.19    0.04 
   3  -4  16    1.43    0.05 
  -3  -3  16    3.03    0.09 
  -2  -3  16    5.01    0.13 
  -1  -3  16    2.38    0.07 
   0  -3  16    7.15    0.18 
   1  -3  16    2.38    0.07 
   2  -3  16    5.00    0.13 
   3  -3  16    3.07    0.09 
  -4  -2  16    2.92    0.11 
  -3  -2  16    0.36    0.03 
  -2  -2  16    2.46    0.08 
  -1  -2  16   10.91    0.27 
   0  -2  16    7.29    0.19 
   1  -2  16   10.90    0.27 
   2  -2  16    2.43    0.08 
   3  -2  16    0.43    0.03 
   4  -2  16    2.82    0.08 
  -3  -1  16    4.19    0.16 
  -2  -1  16    0.45    0.03 
  -1  -1  16    0.81    0.03 
   0  -1  16    9.60    0.20 
   1  -1  16    0.62    0.03 
   2  -1  16    0.48    0.04 
   3  -1  16    4.09    0.11 
   4  -1  16    1.38    0.09 
  -4   0  16    0.39    0.03 
  -3   0  16    0.87    0.04 
  -2   0  16    0.53    0.03 
  -1   0  16    3.03    0.09 
   0   0  16    3.21    0.09 
   1   0  16    2.81    0.08 
   2   0  16    0.54    0.03 
   3   0  16    0.93    0.04 
  -4   1  16    1.34    0.04 
  -3   1  16    4.19    0.11 
  -2   1  16    0.53    0.03 
  -1   1  16    0.82    0.04 
   0   1  16    9.73    0.24 
   1   1  16    0.76    0.04 
   2   1  16    0.47    0.03 
   3   1  16    4.21    0.15 
  -4   2  16    3.05    0.08 
  -3   2  16    0.40    0.03 
  -2   2  16    2.53    0.07 
  -1   2  16   11.13    0.27 
   0   2  16    7.62    0.19 
   1   2  16   10.84    0.27 
   2   2  16    2.46    0.10 
   3   2  16    0.42    0.04 
   4   2  16    2.86    0.11 
  -3   3  16    3.25    0.09 
  -2   3  16    5.06    0.13 
  -1   3  16    2.45    0.07 
   0   3  16    6.94    0.18 
   1   3  16    2.42    0.10 
   2   3  16    5.26    0.19 
   3   3  16    3.17    0.12 
  -3   4  16    1.55    0.07 
  -2   4  16    1.23    0.04 
  -1   4  16    1.18    0.04 
   0   4  16    0.38    0.04 
   1   4  16    1.17    0.06 
   2   4  16    1.14    0.06 
   3   4  16    1.64    0.06 
  -2   5  16    0.73    0.04 
   0   5  16    0.05    0.02 
   1   5  16    7.02    0.25 
   2   5  16    0.79    0.04 
  -1  -4  17    2.87    0.11 
   0  -4  17    0.81    0.04 
   1  -4  17    2.96    0.08 
  -2  -3  17    3.48    0.10 
  -1  -3  17    0.01    0.02 
   0  -3  17    2.05    0.06 
   1  -3  17    0.05    0.02 
   2  -3  17    3.37    0.10 
  -3  -2  17    2.84    0.11 
  -2  -2  17    1.72    0.06 
  -1  -2  17    1.53    0.06 
   0  -2  17    4.31    0.12 
   1  -2  17    1.59    0.06 
   2  -2  17    1.80    0.06 
   3  -2  17    2.60    0.08 
  -3  -1  17    0.92    0.05 
  -2  -1  17    2.36    0.10 
  -1  -1  17    1.15    0.06 
   0  -1  17    1.06    0.05 
   1  -1  17    1.27    0.05 
   2  -1  17    2.40    0.07 
   3  -1  17    0.94    0.04 
  -3   0  17    1.38    0.05 
  -2   0  17    0.87    0.03 
  -1   0  17    2.07    0.06 
   0   0  17    0.02    0.01 
   1   0  17    2.04    0.06 
   2   0  17    0.82    0.04 
  -3   1  17    0.94    0.03 
  -2   1  17    2.37    0.07 
  -1   1  17    1.23    0.04 
   0   1  17    1.10    0.04 
   1   1  17    1.22    0.04 
   2   1  17    2.19    0.07 
  -3   2  17    2.93    0.08 
  -2   2  17    1.76    0.05 
  -1   2  17    1.67    0.05 
   0   2  17    4.32    0.11 
   1   2  17    1.55    0.05 
   2   2  17    1.69    0.07 
   3   2  17    2.76    0.10 
  -2   3  17    3.70    0.10 
  -1   3  17    0.05    0.02 
   0   3  17    2.07    0.06 
   1   3  17    0.05    0.02 
   2   3  17    3.66    0.13 
  -1   4  17    3.04    0.11 
   0   4  17    0.87    0.05 
   1   4  17    3.13    0.11 
  -1  -2  18    2.20    0.07 
   0  -2  18    2.61    0.08 
   1  -2  18    2.18    0.07 
  -1  -1  18    2.88    0.11 
   0  -1  18    4.52    0.16 
   1  -1  18    2.84    0.11 
   2  -1  18    1.07    0.06 
  -2   0  18    1.02    0.05 
  -1   0  18    1.13    0.04 
   0   0  18    3.97    0.10 
   1   0  18    1.04    0.06 
   2   0  18    0.87    0.06 
  -2   1  18    1.17    0.04 
  -1   1  18    2.98    0.08 
   0   1  18    4.48    0.11 
   1   1  18    2.96    0.11 
  -1   2  18    2.25    0.06 
   0   2  18    2.56    0.07 
   1   2  18    2.28    0.09 
   0   0   0    0.00    0.00 
; 
_shelx_hkl_checksum   23392 
  
